# Supplementary material for: Preoperative hypoalbuminemia was associated with acute kidney injury in high-risk patients following non-cardiac surgery: a retrospective cohort study
Source: BMC Anesthesiol. 2019 Sep 2;19:171. doi: 10.1186/s12871-019-0842-3 (PMC6719349; doi:10.1186/s12871-019-0842-3)
Supplement: Supplementary file 7 — Dataset. Relevant data underlying the main results. (XLSX 413 kb) [file 12871_2019_842_MOESM7_ESM.xlsx]

## Sheet: Dataset. Relevant data underlyi
Age (years)	Admission date	Main diagnosis at admission	Height (cm)	Body Weight (Kg)	BMI (kg/m2)	History of hypertension	History of diabetes mellitus	History of coronary heart disease	History of congestive heart failure	History of chronic liver disease	History of chronic lung disease	History of cerebrovascular disease	History of peripheral vascular disease	Malignant neoplasm	History of chronic kidney disease	Stage of CKD	History of kidney transplantation	History of neprhorectomy	Smoke	Preoperative on ACEI/ARB	Preoperative radiocontrast exposure	Preoperative Hb (g/L)	Preoperative albumin (g/L)	Serum creatinine at admission (umol/L)	Serum urea at admission (mmol/L)	Preoperative BNP (pg/ml)	Surgery date	Type of surgery	General surgery	Other	Orthopedic surgery	Thoracic surgery	Neurosurgery	Gynecological surgery	Urologic surgery	ENT surgery	Vascular surgery	Emergency surgery	Open surgery	ASA classification	Duration of surgery (min)	Duration of anesthesia (min)	Volume of intraoperative input (ml)	Artificial colloid infusion	Volume of artificial colloid infusion (ml)	Intraoperative blood transfusion	Volume of intraoperative output (ml)	Intraoperative estimated blood loss (ml)	Intraoperative UO
36-40	2017-07-04	Mediastinum tumor	172	62	20.9573	0	0	0	0	0	0	0	0	1	0		0	0	0	0	0	111	29.8	64.32	5.48	1457	2017-07-11	4	0	0	0	1	0	0	0	0	0	0	2	4	535	607	10200	1	2100	1	3350	3000	350
81-85	2017-07-13	Nasosinusitis	156	55	22.6003	0	1	0	0	0	0	1	0	0	1	2	0	0	0	0	0	119	35.5	74	4.42		2017-07-18	9	0	0	0	0	0	0	0	1	0	0		3	121	192	1500	0		0
61-65	2017-07-13	Arterial stenosis	173			1	0	0	0	0	0	1	1	0	0		0	0	1	0	0	99	30.9	54.3	3.55	47	2017-07-18	10	0	0	0	0	0	0	0	0	1	0		2	104	192	1500	0		0	1050	50	1000
46-50	2017-07-10	Duodenum tumor	169	82	28.7105	0	0	0	0	0	0	0	1	1	0		0	1	1	0	0	59	26.6	81.21	3.97		2017-07-19	5	1	0	0	0	0	0	0	0	0	0	2	2	361	422	3900	1	500	1	900	400	500
86-90	2017-07-13	Biliary stone	178	80	25.2493	1	0	0	0	0	0	0	0	0	0		0	0	0	0	0	174	38.8	84.7	8.74	172	2017-07-18	5	1	0	0	0	0	0	0	0	0	0	2	3	131	188	800	0		0	150	10	150
86-90	2017-07-18	Bladder tumor	163	60	22.5827	1	0	0	0	0	0	0	0	1	0		0	0	0	0	0	133	41.8	105.6	4.92	259	2017-07-20	8	0	0	0	0	0	0	1	0	0	0		3	20	95	500	0
61-65	2017-07-14	Biliary stone	154	45	18.9745	0	0	0	0	0	0	0	0	0	0		0	0	0	0	0	121	33.2	54.5	6.37	15	2017-07-20	5	1	0	0	0	0	0	0	0	0	0	2	2	209	286	2100	1	500	0	1050	100	950
76-80	2017-07-11	Idigitation	150	63	28	1	1	1	0	0	1	0	0	1	1	4	0	0	0	0	0	74	25.2	145.8	11.81	116	2017-07-19	5	1	0	0	0	0	0	0	0	0	0	2	3	139	256	1600	0		0	200		200
76-80	2017-07-20	Bladder tumor	165	60	22.0386	0	0	0	0	0	0	0	0	1	0		0	0	0	0	0	138	38.4	74.7	5.08	171	2017-07-24	8	0	0	0	0	0	0	1	0	0	0	1	2	161	248	3200	1	1000	0	900	400	500
51-55	2017-07-19	Tympanitis	174	93	30.7174	1	0	1	1	0	0	0	0	0	1	4	0	0	1	0	0	138	41.2	220	12.14	80	2017-07-24	9	0	0	0	0	0	0	0	1	0	0		3	173	259	1100	0		0	300	150	150
31-35	2017-07-24	Adrenal tumor	153	43	18.369	0	0	0	0	0	0	0	0	0	0		0	0	0	0	0	116	43	56.87	5.46		2017-07-25	8	0	0	0	0	0	0	1	0	0	0	1	2	99	174	3000	1	500	0	700	100	600
71-75	2017-07-19	Intestinal tumor	166	78	28.306	1	1	1	0	0	0	0	0	0	0		0	0	0	0	1	162	43.6	78.92	4.91	15	2017-07-21	5	1	0	0	0	0	0	0	0	0	0	1	3	249	369	2100	0		0	650	10	650
76-80	2017-07-20	Prolapse of uterus	158	65	26.0375	1	0	1	0	0	0	0	1	0	0		0	0	0	0	0	153	46.5	69.2	3.24	40	2017-07-26	7	0	0	0	0	0	1	0	0	0	0		3	153	221	1000	0		0	1000	100	800
71-75	2017-07-18	Urinary tract infection	158	59	23.634	0	0	0	0	0	0	0	0	0	0		0	0	0	0	0	111	37.8	70.6	3.22		2017-07-26	5	1	0	0	0	0	0	0	0	0	0	2	2	306	390	3100	1	500	0	900	200	700
81-85	2017-07-20	Thyroid tumor	157	55	22.3133	1	0	0	0	0	0	0	0	0	0		0	0	0	0	0	118	36.6	100	10.7		2017-07-24	11	0	1	0	0	0	0	0	0	0	0		2	143	192	1000	0		0
81-85	2017-07-24	Ileus	165	55	20.202	1	1	0	0	0	0	0	0	1	0		0	1	0	0	0	134	33.7	91	5	112	2017-07-24	5	1	0	0	0	0	0	0	0	0	1	2	3	249	323	3200	1	1000	0	1400	50	1350
26-30	2017-07-24	Retroperitoneal tumor	158	44	17.6254	0	0	0	0	0	0	0	0	0	0		0	0	0	0	0	157	32.8	62.31	2.38		2017-07-27	5	1	0	0	0	0	0	0	0	0	0	2	2	243	306	5000	1	500	1	900	800	100
86-90	2017-07-13	Femoral necrosis	175	75	24.4898	0	1	1	0	0	0	1	0	1	0		0	0	0	0	0	125	41.9	97.3	9.63	64	2017-07-28	3	0	0	1	0	0	0	0	0	0	0		3	188	273	2600	0		0	800	400	400
56-60	2017-07-20	Esophageal tumor	160	53	20.7031	0	0	0	0	0	0	0	0	1	0		0	0	1	0	0	144	42	66.3	4.36		2017-07-28	4	0	0	0	1	0	0	0	0	0	0	2	2	390	471	2600	1	500	0	1200	150	1050
61-65	2017-07-28	Bladder tumor	167	73	26.1752	1	1	0	0	0	0	0	0	1	0		0	0	0	0	0	122	41	118.9	5.68		2017-08-07	8	0	0	0	0	0	0	1	0	0	0	1	2	300	507	3600	1	1000	0	200	200
61-65	2017-07-24	Colorectal tumor with hepatic metastases	170	78	26.9896	1	0	1	0	0	0	0	0	1	0		0	0	1	1	0	133	44.1	80.2	4.47	246	2017-07-31	5	1	0	0	0	0	0	0	0	0	0	2	3	195	294	4350	1	1000	0	1000	400	600
76-80	2017-07-25	Gastric tumor	182	68	20.5289	0	0	1	0	0	1	0	0	1	0		0	0	1	0	0	111	31.1	89.5	3.44	148	2017-08-01	5	1	0	0	0	0	0	0	0	0	0	2	3	377	462	3850	1	1000	0	950	400	550
61-65	2017-07-26	Colorectal tumor	170	71	24.5675	0	1	1	0	0	0	0	0	1	0		0	0	1	0	0	140	47.2	91	6.77	273	2017-07-31	5	1	0	0	0	0	0	0	0	0	0	1	3	93	167	1700	1	500	0	350	50	300
86-90	2017-07-27	Fracture	174	68	22.46	1	1	1	0	0	0	0	0	0	0		0	0	0	1	0	129	37.8	79.63	5.24	117	2017-07-31	3	0	0	1	0	0	0	0	0	0	0		3	64	148	1700	1	500	0	600	200	400
26-30	2017-07-27	Pregnancy	156	80	32.8731	0	0	0	0	0	0	0	0	0	0		0	0	0	0	0	91	27.1	71.8	6.82	282	2017-07-29	7	0	0	0	0	0	1	0	0	0	1	2	4	78	158	2300	1	500	1	250	150	100
61-65	2017-07-31	Bladder tumor	168	84	29.7619	0	0	1	0	0	0	0	0	1	0		0	0	1	0	0	149	42.7	107.15	5.84	143	2017-08-02	8	0	0	0	0	0	0	1	0	0	0		2	18	52	1000	0		0
31-35	2017-07-18	Placenta implantation	165	74	27.1809	0	0	0	0	0	0	0	0	0	0		0	0	0	0	0	75	32	60.2	3.34		2017-08-02	7	0	0	0	0	0	1	0	0	0	0	2	3	307	457	16800	1	1000	1	9800	8500	1300
61-65	2017-07-26	Pelvic tumor	164	60	22.3081	0	0	0	0	0	0	0	0	0	0		0	0	0	0	0	139	39.6	78.85	5.85	25	2017-08-02	5	1	0	0	0	0	0	0	0	0	0	2	2	146	221	5300	1	1000	1	3450	3200	250
71-75	2017-07-18	Adrenal tumor	149	40	18.0172	1	0	0	0	0	0	0	0	0	0		0	0	0	0	0	97	45.3	63.6	6.17	57	2017-08-02	8	0	0	0	0	0	0	1	0	0	0	1	3	151	208	3500	1	1000	0	700	300	400
76-80	2017-07-24	Colorectal tumor	170	89	30.7958	1	0	1	0	0	1	0	0	1	0		0	0	1	0	0	139	40	88.7	7.21	351	2017-08-03	5	1	0	0	0	0	0	0	0	0	0	1	3	124	199	2100	0		0	270	20	200
71-75	2017-07-25	Intestinal tumor	165	72	26.4463	0	0	0	0	0	0	0	0	1	1	4	0	0	1	0	0	81	46.8	210.3	13.3		2017-07-31	5	1	0	0	0	0	0	0	0	0	0	2	2	205	289	2300	1	500	1	700	200	500
76-80	2017-08-02	Bladder tumor	170	72	24.9135	0	0	1	0	0	0	1	0	1	0		0	0	0	0	0	148	40.2	81.3	4.3	379	2017-08-03	8	0	0	0	0	0	0	1	0	0	0		3	34	93	600	0		0
76-80	2017-07-31	Bladder tumor	172	69	23.3234	1	0	0	0	0	0	1	0	1	0		0	0	0	0	0	144	41.4	94.1	9.76		2017-08-03	8	0	0	0	0	0	0	1	0	0	0	1	2	163	251	2200	0		0	400	100	300
86-90	2017-07-26	Prolapse of uterus	155	65	27.0552	1	1	1	0	0	0	0	0	0	0		0	0	0	0	0	123	34.4	57.4	5.39	80	2017-08-04	7	0	0	0	0	0	1	0	0	0	0		3	106	179	1000	0		0	600	10	600
56-60	2017-07-31	Retroperitoneal tumor	150	56	24.8889	0	0	0	0	0	0	0	0	0	0		0	0	0	0	0	124	44.6	73.16	6.16		2017-08-02	8	0	0	0	0	0	0	1	0	0	0	2	2	236	289	10188	1	2000	1	3900	3000	900
56-60	2017-08-02	Ureter stone	172	87	29.4078	1	1	1	0	0	0	0	0	0	0		0	0	1	0	0	150	43.1	101.2	6.01	41	2017-08-07	8	0	0	0	0	0	0	1	0	0	0		3	107	147	1100	0		0
71-75	2017-08-03	Colorectal tumor	173	71	23.7228	1	0	0	0	0	0	1	1	1	0		0	0	1	0	0	132	33	98.91	5.79		2017-08-07	5	1	0	0	0	0	0	0	0	0	0	2	2	187	267	2250	0		0	950	50	900
61-65	2017-08-04	Renal stone	162	52	19.8141	0	0	1	0	0	0	0	0	0	0		0	0	0	0	0	134	43.6	72.79	4.63	101	2017-08-07	8	0	0	0	0	0	0	1	0	0	0		2	65	120	1100	0		0
81-85	2017-06-24	Fracture	170	65	22.4913	1	0	0	0	0	0	1	0	0	1	4	0	0	0	0	0	80	29.9	219.75	17.91	218	2017-06-27	3	0	0	1	0	0	0	0	0	0	0		4	282	351	4350	1	500	1	850	500	350
46-50	2017-07-27	Gastric tumor	172	90	30.4218	1	0	0	0	0	0	1	0	1	0		0	0	0	0	0	93	42	81.06	3.78		2017-08-08	5	1	0	0	0	0	0	0	0	0	0	2	3	290	358	4250	0		1	450	200	250
81-85	2017-07-31	Bladder tumor	168	58	20.5499	1	0	0	0	0	0	0	0	1	0		0	0	0	0	0	99	26.8	105.07	6.09	201	2017-08-08	8	0	0	0	0	0	0	1	0	0	0		4	38	75	600	0		0
86-90	2017-08-04	Bladder tumor	172	75	25.3515	1	0	1	0	0	0	1	0	1	0		0	0	0	0	0	137	44.5	99.94	9.15	25	2017-08-08	8	0	0	0	0	0	0	1	0	0	0		3	66	119	1000	0		0
66-70	2017-08-07	Urethra tumor	155	42	17.4818	0	0	0	0	0	0	0	0	1	0		0	0	0	0	0	121	42.8	58.36	4.1		2017-08-09	8	0	0	0	0	0	0	1	0	0	0	2	3	158	214	1600	1	500	0	200	100	100
31-35	2017-08-07	Intraabdominal tumor	158	43	17.2248	0	0	0	0	0	0	0	0	0	0		0	0	0	0	0	129	37.4	54.21	3.08		2017-08-09	5	1	0	0	0	0	0	0	0	0	0	2	3	186	274	2300	1	500	0	400	300	100
51-55	2017-08-18	Ileus	158	62	24.8358	0	0	0	0	0	0	0	0	1	0		0	0	0	0	0	133	39.1	54.38	4.67	163	2017-08-28	5	1	0	0	0	0	0	0	0	0	0	1	2	141	267	2100	0		0	900	100	800
16-20	2017-08-16	Thymoma	155	50	20.8117	0	0	0	0	0	0	0	0	0	0		0	0	0	0	0	124	39.8	58.2	6.47		2017-08-23	4	0	0	0	1	0	0	0	0	0	0	1	2	207	286	1300	1	500	0	200	10	100
41-45	2017-08-25	Adrenal tumor	170	90	31.1419	0	0	0	0	0	0	0	0	0	0		0	0	0	0	0	154	46.1	91.3	3.31	42	2017-08-28	8	0	0	0	0	0	0	1	0	0	0	2	2	155	232	2600	1	500	0	800	300	500
81-85	2017-08-22	Pancreas tumor	162	65	24.7676	1	1	0	0	0	0	0	0	0	0		0	0	0	0	0	144	46	93.04	5.4		2017-08-28	5	1	0	0	0	0	0	0	0	0	0	1	2	157	230	1100	0		0	10	10
61-65	2017-08-21	Esophageal tumor	176	76	24.5351	0	0	1	0	0	0	0	0	1	0		0	0	0	0	0	150	38.3	79.23	4.68		2017-08-29	4	0	0	0	1	0	0	0	0	0	0	2	2	651	747	3600	1	1000	0	950	300	650
41-45	2017-08-25	Thyroid tumor	177	100	31.9193	0	0	0	0	0	0	0	0	1	0		0	0	1	0	0	167	46.7	78.2	4.93		2017-08-29	11	0	1	0	0	0	0	0	0	0	0		2	277	326	1500	0		0	250	50	200
71-75	2017-08-11	Acute cholangitis	160	50	19.5312	1	0	1	0	0	0	0	0	1	0		0	0	0	0	0	94	36	75.45	6.05	209	2017-08-25	5	1	0	0	0	0	0	0	0	0	0	2	3	430	524	9500	1	1500	1	5200	4500	700
86-90	2017-08-28	Bladder tumor	173	40	13.365	1	0	1	0	0	1	0	0	1	0		0	0	1	0	0	114	39.6	83.8	10.57	115	2017-08-29	8	0	0	0	0	0	0	1	0	0	0		3	25	80	500	0		0	10	10
46-50	2017-08-24	Biliary stone	160	56	21.875	0	0	0	0	0	0	0	0	0	0		0	0	0	0	0	138	45.1	76.12	5.18	6	2017-08-29	5	1	0	0	0	0	0	0	0	0	0	2	2	247	320	3100	1	1000	0	1050	10	1050
81-85	2017-08-23	Colorectal tumor	145	46	21.8787	1	0	0	0	0	0	0	0	1	0		0	0	0	0	0	84	34.7	63.47	3.41		2017-08-30	5	1	0	0	0	0	0	0	0	0	0	1	3	209	318	1600	1	500	0	360	10	350
81-85	2017-08-21	Bladder tumor	158	50	20.0288	1	1	1	0	0	0	1	0	1	0		0	0	1	0	0	133	35.2	78.3	4.83	25	2017-08-30	8	0	0	0	0	0	0	1	0	0	0	1	2	188	269	2200	0		1	100	100
61-65	2017-07-26	Adrenal tumor	168	72	25.5102	0	0	0	0	0	0	0	1	0	0		0	0	1	0	0	135	39.7	78.5	4.5	17	2017-08-10	8	0	0	0	0	0	0	1	0	0	0	1	2	67	150	2001	1	500	0	100	10	100
76-80	2017-07-31	Lung tumor	169	49	17.1563	0	0	0	0	0	0	0	0	1	0		0	0	0	0	0	116	34.4	67.45	6.18	100	2017-08-10	4	0	0	0	1	0	0	0	0	0	0	1	3	251	373	1100	0		0	450	10	450
76-80	2017-08-04	Colorectal tumor	161	52	20.061	0	0	0	0	0	0	1	0	1	0		0	0	0	0	0	115	31.1	89.3	2.75	340	2017-08-10	5	1	0	0	0	0	0	0	0	0	0	1	3	204	300	2350	1	500	0	450	50	400
31-35	2017-08-01	Ulcerative colitis	165	60	22.0386	0	0	0	0	0	0	0	0	0	0		0	0	0	0	1	28	26.8	64.6	5.25	117	2017-08-06	5	1	0	0	0	0	0	0	0	0	1	2	3	235	330	4900	1	1500	1	850	500	350
66-70	2017-08-07	Gastric tumor	174	68	22.46	0	1	0	0	0	0	0	0	1	0		0	0	0	0	0	140	43.5	95.68	6.29	51	2017-08-11	5	1	0	0	0	0	0	0	0	0	0	1	2	192	255	2600	1	500	0	500	300	200
66-70	2017-08-09	Hematuria	178	95	29.9836	1	0	0	0	0	0	0	0	1	0		0	0	0	0	0	80	30.7	62	3.6		2017-08-11	8	0	0	0	0	0	0	1	0	0	1		3	23	63	1400	1	500	0
76-80	2017-07-12	Esophageal tumor	167	59	21.1553	0	0	0	0	0	0	0	0	1	0		0	0	0	0	0	131	34.9	64.89	7.36		2017-07-27	4	0	0	0	1	0	0	0	0	0	0	2	1	560	676	6000	1	1500	1	1750	1000	750
81-85	2017-08-11	Bladder tumor	160	62	24.2188	0	0	0	0	0	0	0	0	1	0		0	0	0	0	0	132	41.8	92.46	9		2017-08-14	8	0	0	0	0	0	0	1	0	0	0	2	3	135	201	1500	0		0
81-85	2017-08-05	Bladder tumor	168	66.3	23.4906	1	0	1	0	0	0	0	0	1	0		0	1	0	0	0	134	41.3	124.4	11.25	580	2017-08-14	8	0	0	0	0	0	0	1	0	0	0		3	22	71	500	0		0
66-70	2017-08-09	Renal stone	168	74	26.2188	1	0	1	0	0	0	0	0	0	0		0	0	0	0	0	152	37.5	72.98	4.8	164	2017-08-14	8	0	0	0	0	0	0	1	0	0	0		3	139	214	1100	0		0
81-85	2017-08-04	Colorectal tumor	160	51	19.9219	1	0	0	0	0	1	1	0	1	0		0	0	0	0	0	109	39.7	130.4	13.03		2017-08-11	5	1	0	0	0	0	0	0	0	0	0	1	3			2100	1	500	0	300	50	250
71-75	2017-08-07	Arterial stenosis	172	76	25.6896	1	0	1	0	0	0	1	0	0	0		0	0	1	0	0	181	46.4	117.8	8.83	17	2017-08-15	10	0	0	0	0	0	0	0	0	1	0		3	98	197	1700	0		0	550	10	550
71-75	2017-08-08	BPH	175	90	29.3878	0	0	0	0	0	0	0	0	1	0		0	1	0	0	0	141	41.3	95.9	5.46		2017-08-15	8	0	0	0	0	0	0	1	0	0	0		3	57	110	1100	0		0
61-65	2017-08-11	Thyroid tumor	157	55	22.3133	1	1	0	0	0	0	0	0	1	0		0	0	0	0	0	128	44.5	44.69	4.93		2017-08-15	11	0	1	0	0	0	0	0	0	0	0		2	147	209	1000	0		0		10
41-45	2017-08-14	Biliary stone	161	42	16.2031	0	0	0	0	0	0	0	0	0	0		0	0	0	0	0	87	42.8	63.26	3.83		2017-08-16	5	1	0	0	0	0	0	0	0	0	0	2	2	152	241	2000	0		1	600	100	500
81-85	2017-08-10	Colorectal tumor	160	68	26.5625	1	0	0	0	0	0	0	0	1	0		0	0	0	0	0	111	38.2	85.38	5.99	100	2017-08-17	5	1	0	0	0	0	0	0	0	0	0	1	4	208	297	2850	1	500	0	400	100	300
66-70	2017-08-04	Liver tumor	160	57	22.2656	1	1	1	0	1	0	0	1	1	0		0	0	0	0	0	135	46.1	79.3	6.42		2017-08-16	5	1	0	0	0	0	0	0	0	0	0	2	3	255	381	7031	0		1	3481	600	1950
71-75	2017-08-08	Lung tumor	155	63	26.2227	1	1	1	0	0	0	0	0	1	0		0	0	0	1	0	126	41.2	94.07	5.87		2017-08-16	4	0	0	0	1	0	0	0	0	0	0	1	3	211	307	1600	0		0	500	10	500
51-55	2017-08-15	Adrenal tumor	156	54	22.1893	0	0	0	0	0	0	0	0	0	0		0	0	0	0	0	112	30.3	61.12	3.12		2017-08-17	8	0	0	0	0	0	0	1	0	0	0	1	2	37	99	1500	1	500	0	600	10	600
71-75	2017-08-11	Hernia	173	73	24.3911	1	1	0	0	0	0	0	0	0	0		0	0	1	0	0	141	44.7	84.89	2.9	52	2017-08-17	12	0	0	0	0	0	0	0	0	0	0		3	89	146	1000	0		0
81-85	2017-08-10	Gastric tumor	168	63	22.3214	0	0	0	0	0	0	0	0	1	0		0	0	1	0	0	136	44.3	87.4	4.6		2017-08-17	5	1	0	0	0	0	0	0	0	0	0	2	2	363	433	3100	1	1000	0	400	10	400
81-85	2017-08-14	Spinal tumor	161	55	21.2183	0	0	0	0	0	0	0	0	1	0		0	0	0	0	0	148	40.5	108.39	8.87	24	2017-08-18	3	0	0	1	0	0	0	0	0	0	0		2	207	326	3300	1	500	1	1150	1000	150
81-85	2017-08-17	Bladder tumor	160	57	22.2656	1	1	1	0	0	0	0	0	1	0		0	0	0	0	0	134	41.2	73.69	4.17		2017-08-21	8	0	0	0	0	0	0	1	0	0	0	1	3	158	240	1600	1	500	0	350	10	350
56-60	2017-08-18	Adrenal tumor	164	73	27.1416	1	1	0	0	0	0	0	0	0	0		0	0	0	0	0	136	47.6	53.6	6.09		2017-08-21	8	0	0	0	0	0	0	1	0	0	0	1	2	67	153	2600	1	500	0	1500	10	1500
66-70	2017-08-03	Medulla tumor	157	61.5	24.9503	1	1	0	0	0	1	0	0	0	0		0	0	0	0	0	140	39.9	72.1	11.82	43	2017-08-22	6	0	0	0	0	1	0	0	0	0	0		2	489	632	6850	1	1000	1	3600	500	3100
61-65	2017-08-15	Duodenum tumor	177	65	20.7476	0	0	0	0	0	0	0	0	1	0		0	0	0	0	0	112	39.6	86.04	5.57		2017-08-18	5	1	0	0	0	0	0	0	0	0	0	2	2	428	494	7400	1	1500	1	2400	1500	300
76-80	2017-08-15	Colorectal tumor	158	70	28.0404	1	1	1	0	0	0	1	0	1	0		0	0	0	0	0	124	37.7	73.5	2.29	82	2017-08-22	5	1	0	0	0	0	0	0	0	0	0	1	3	144	206	1750	0		0	200	100	100
86-90	2017-08-15	Prolapse of uterus	150	60	26.6667	1	0	0	0	0	0	0	0	0	0		0	0	0	0	0	114	42	112.1	9.25	82	2017-08-21	7	0	0	0	0	0	1	0	0	0	0	2	3	144	196	1000	0		0	300	50	250
31-35	2017-08-19	Fracture	174	72	23.7812	0	0	0	0	0	0	0	0	0	0		0	0	0	0	0	106	41.2	61.6	3.9	15	2017-08-22	3	0	0	1	0	0	0	0	0	0	0		2	245	357	5100	1	1000	1	1450	1000	450
86-90	2017-08-18	Cecal tumor	158	60	24.0346	0	0	0	0	0	0	0	0	1	0		0	0	0	0	0	112	36.1	66.79	3.38		2017-08-23	5	1	0	0	0	0	0	0	0	0	0	2	2	161	238	2850	1	500	0	600	10	600
71-75	2017-08-14	Cerebral tumor	160	73	28.5156	1	0	0	0	0	0	1	0	0	0		0	0	0	0	1	131	42.8	70.8	7.13		2017-08-23	6	0	0	0	0	1	0	0	0	0	0		2	301	419	3050	1	500	0	1300	500	800
51-55	2017-08-17	Obstructive jaundice	170	63	21.7993	0	0	0	0	0	0	0	0	1	0		0	0	1	0	0	146	38.7	96.1	7.92		2017-08-23	5	1	0	0	0	0	0	0	0	0	0	2	2	406	468	5600	1	1500	0	1300	500	800
56-60	2017-08-21	Adrenal tumor	160	72	28.125	0	0	0	0	0	0	0	0	0	0		0	0	0	0	0	121	43.2	65.37	4.39	165	2017-08-24	8	0	0	0	0	0	0	1	0	0	0	1	2	84	142	2000	1	500	0	100	10	100
76-80	2017-08-17	Pancreas tumor	165	55	20.202	1	1	1	0	0	0	1	0	1	0		0	0	0	0	0	171	46.1	71	11	82	2017-08-24	5	1	0	0	0	0	0	0	0	0	0	2	3	264	344	6200	1	1500	0	1150	600	500
46-50	2017-07-27	Gastric tumor	172	90	30.4218	1	0	0	0	0	0	1	0	1	0		0	0	0	0	1	93	42	81.06	3.78		2017-08-08	5	1	0	0	0	0	0	0	0	0	0	2	3	290	418	4250	0		1	450	200	250
81-85	2017-09-13	Gastric tumor	170	48	16.609	0	0	0	0	0	0	0	0	1	0		0	0	0	0	0	113	36.7	96.75	9.8	667	2017-09-25	5	1	0	0	0	0	0	0	0	0	0	1	3	94	150	1100	0		0	50	10	50
56-60	2017-09-22	Adrenal tumor	155	57	23.7253	1	0	0	0	0	0	0	0	0	0		0	0	0	0	0	132	42.4	71.64	4.14		2017-09-26	8	0	0	0	0	0	0	1	0	0	0	1	2	56	169	3000	1	1000	0	700	10	700
36-40	2017-09-04	Adrenal tumor	173	77	25.7276	0	0	0	0	0	0	0	0	0	0		0	0	0	0	0	152	47.9	66.38	4.23	144	2017-09-26	8	0	0	0	0	0	0	1	0	0	0	1	2	56	169	1600	1	500	0		10
61-65	2017-09-18	Liver tumor	173	60	20.0474	0	0	0	0	1	0	0	0	1	0		0	0	1	0	1	78	31.6	82.22	6.1	57	2017-09-26	5	1	0	0	0	0	0	0	0	0	0	2	2	588	686	15250	1	2500	1	3900	3500	400
76-80	2017-09-27	Spinalcompression	172	55	18.5911	1	0	1	0	0	0	0	0	1	0		0	0	0	0	0	79	24.9	62.9	3.54		2017-09-28	3	0	0	1	0	0	0	0	0	0	1		2	221	326	2800	1	1000	1	1350	600	750
71-75	2017-09-20	Pancreas tumor	174	65	21.4692	0	1	0	0	0	0	0	0	1	0		0	0	1	0	0	146	46.8	68.5	7.29		2017-09-28	5	1	0	0	0	0	0	0	0	0	0	1	2	140	230	2700	1	1000	0	650	100	550
56-60	2017-09-12	Thyroid tumor	165	67	24.6097	1	0	0	0	0	0	0	0	1	0		0	0	0	0	0	129	36.4	81.6	5.25	41	2017-09-28	11	0	1	0	0	0	0	0	0	0	0		2	21	88	500	0		0		10
51-55	2017-09-15	Breast tumor	161	53	20.4467	0	0	0	0	0	0	1	0	1	0		0	0	0	0	0	134	41.3	72.57	3.09		2017-09-28	11	0	1	0	0	0	0	0	0	0	0		2	17	57	1000	0		0		10
76-80	2017-09-29	Bladder tumor	150	46	20.4444	0	0	0	0	0	0	0	0	1	0		0	0	0	0	0	123	39.3	96.3	4.69		2017-09-30	8	0	0	0	0	0	0	1	0	0	0	2	2	221	320	3900	1	500	1
76-80	2017-09-19	Biliary tumor	179	72	22.4712	1	0	0	0	0	0	0	0	1	0		0	0	1	0	1	108	28.7	76.88	6.16		2017-09-28	5	1	0	0	0	0	0	0	0	0	0	2	2	568	668	5800	1	1500	0	900	300	600
61-65	2017-09-26	Colorectal tumor with hepatic metastases	168	80	28.3447	1	0	0	0	0	0	1	0	1	0		0	0	1	0	1	154	43.1	75.36	4.18		2017-09-29	5	1	0	0	0	0	0	0	0	0	0	1	3	119	264	2300	1	500	0	600	400	200
51-55	2017-09-25	Colorectal tumor	178	67	21.1463	0	1	0	1	0	0	1	0	1	0		0	0	1	0	0	145	42.9	86.93	5.88	262	2017-09-29	5	1	0	0	0	0	0	0	0	0	0	1	4	154	275	1800	1	200	0	500	100	400
86-90	2017-10-04	Acute cholangitis	155	70	29.1363	1	0	1	0	0	0	0	0	0	0		0	0	1	0	0	131	35.2	73	3.6	157	2017-10-04	5	1	0	0	0	0	0	0	0	0	1	2	3	83	157	1000	0		0	261	11	250
96-100	2017-10-06	Ileus	165	54	19.8347	0	1	0	0	0	0	0	0	1	0		0	0	1	0	0	135	39.6	69	4.5		2017-10-06	5	1	0	0	0	0	0	0	0	0	1	2	3	125	207	1200	0		0	450	50	400
76-80	2017-09-11	Biliary tumor	164	63	23.4236	1	0	0	0	0	0	1	0	1	0		0	0	0	1	0	84	29.6	90.8	2.11	371	2017-10-10	5	1	0	0	0	0	0	0	0	0	0	2	3	459	521	4300	1	1000	0	1000	600	400
71-75	2017-09-22	Gastric tumor	172	63	21.2953	1	1	1	0	0	0	0	0	1	0		0	0	0	0	0	79	34.6	91	7.64	29	2017-10-11	5	1	0	0	0	0	0	0	0	0	0	2	2	215	308	3850	1	1000	0	650	300	350
51-55	2017-09-06	Lung tumor	174	79	26.0933	0	0	0	0	0	0	1	0	1	0		0	0	1	0	1	156	42.4	69.32	3.81		2017-10-10	4	0	0	0	1	0	0	0	0	0	0	2	2	608	716	7400	1	1000	0	1050		1050
81-85	2017-09-18	Colorectal tumor with hepatic metastases	150	50	22.2222	1	0	1	0	0	0	0	1	1	0		0	0	0	1	1	79	34.2	64.1	7.8	214	2017-10-12	5	1	0	0	0	0	0	0	0	0	0	2	2	205	265	1850	1	500	0
81-85	2017-10-03	GIH	170	90	31.1419	1	1	0	0	0	0	1	0	0	0		0	0	0	0	1	108	34.7	123	13.1	45	2017-10-03	5	1	0	0	0	0	0	0	0	0	1	2	4	149	222	5700	1	1000	1	250		250
16-20	2017-10-03	Ileus	172	64	21.6333	0	0	0	0	0	0	0	0	0	0		0	0	0	0	0	153	34.6	62.71	4.17		2017-10-04	5	1	0	0	0	0	0	0	0	0	1	2	2	231	300	6250	1	1000	0	650	50	600
66-70	2017-10-11	Bladder tumor	175	72	23.5102	0	0	0	0	0	0	0	0	1	0		0	0	0	0	0	118	41.5	75.8	4.95	15	2017-10-13	8	0	0	0	0	0	0	1	0	0	0	2	3	180	210	3500	1	2000	0	550		550
56-60	2017-09-25	Colorectal tumor	150	46	20.4444	0	0	0	0	0	1	0	0	1	0		0	0	0	0	0	130	43.3	50.18	4.59		2017-10-13	5	1	0	0	0	0	0	0	0	0	0	1	3	141	252	2750	1	1000	0	800		800
71-75	2017-10-12	Prostate tumor	166	81	29.3947	1	0	0	0	0	0	0	0	1	0		0	0	0	1	0	131	41.4	92.1	7.31		2017-10-16	8	0	0	0	0	0	0	1	0	0	0	1	3	128	204	2300	1	500	0	100		100
86-90	2017-09-27	Colorectal tumor	162	62	23.6244	1	0	0	0	0	0	0	0	1	0		0	0	0	0	0	111	35.7	66.8	4.34	223	2017-10-16	5	1	0	0	0	0	0	0	0	0	0	2	3	151	235	1850	1	500	0	400	50	350
71-75	2017-10-09	Esophageal tumor	167	70	25.0995	1	1	1	0	0	1	0	0	1	0		0	0	0	0	0	136	41.5	76.92	3.84		2017-10-13	4	0	0	0	1	0	0	0	0	0	0	2	2	436	552	4800	1	1000	0	600	200	400
81-85	2017-10-09	Colorectal tumor with hepatic metastases	173	81	27.0641	0	0	0	0	0	0	1	0	1	0		0	0	0	0	0	127	36.5	90.7	5.94	359	2017-10-17	5	1	0	0	0	0	0	0	0	0	0	2	2	138	250	2550	1	500	0	300	50	250
51-55	2017-10-11	Gastric tumor	180	95	29.321	1	0	0	0	0	0	0	0	1	0		0	0	1	0	1	135	43	76.87	7.1		2017-10-19	5	1	0	0	0	0	0	0	0	0	0	1	2	267	369	2100	1	500	0	650	200	450
61-65	2017-09-05	Obstructive jaundice	158	74	29.6427	0	0	0	0	0	0	0	0	1	0		0	0	0	0	0	141	39.6	60.2	4.14		2017-09-29	5	1	0	0	0	0	0	0	0	0	0	2	2	506	630	4100	1	1000	0	1000	200	800
61-65	2017-10-10	Gastric tumor	175	96	31.3469	0	0	0	0	0	0	0	0	1	0		0	0	1	0	0	129	37.1	78	4.83	20	2017-10-20	5	1	0	0	0	0	0	0	0	0	0	2	2	318	451	5100	1	1000	0	350		350
76-80	2017-10-14	Fracture	150	50	22.2222	0	0	0	0	0	0	0	0	1	0		0	0	1	0	0	91	31.9	42.7	4.1	524	2017-10-17	3	0	0	1	0	0	0	0	0	0	1		3	122	236	2700	1	500	1
71-75	2017-09-22	Esophageal tumor	168	74	26.2188	1	0	0	0	0	0	1	0	1	0		0	0	1	0	0	156	42.3	112.97	5.96		2017-10-10	4	0	0	0	1	0	0	0	0	0	0	2	3	278	396	3200	1	1000	0	1050	500	550
51-55	2017-10-10	Adrenal tumor	165	56	20.5693	1	0	0	0	0	0	0	0	0	0		0	0	0	0	0	127	44.9	69.3	5.7		2017-10-23	8	0	0	0	0	0	0	1	0	0	0	1	3	62	137	1600	1	500	0		10
86-90	2017-10-17	Colorectal tumor	172	70	23.6614	1	1	0	0	0	0	0	0	1	0		0	0	0	0	0	104	39.5	73.18	4.24	344	2017-10-23	5	1	0	0	0	0	0	0	0	0	0	1	3	171	255	2600	1	500	0	150	50	100
51-55	2017-10-16	Ileus	166	58	21.048	1	0	0	0	0	0	0	0	1	0		0	0	0	0	1	102	34.6	74	7.09	88	2017-10-24	5	1	0	0	0	0	0	0	0	0	0	2	2	175	231	2100	0		0	150	10	150
76-80	2017-10-18	Ileus	156	52	21.3675	0	0	0	0	0	0	0	0	1	0		0	0	0	0	1	127	39.2	65	7.5		2017-10-18	5	1	0	0	0	0	0	0	0	0	1	2	4	210	293	6100	1	1000	0	450	100	350
21-25	2017-10-23	Bladder tumor	178	64	20.1995	1	0	0	0	0	0	0	0	0	0		0	0	0	0	0	150	50.5	81	3.8		2017-10-25	8	0	0	0	0	0	0	1	0	0	0	1	2	56	119	1300	0		0	360	10	350
81-85	2017-10-17	Breast tumor	160	59	23.0469	1	1	1	0	0	0	0	0	1	0		0	0	0	0	0	118	43.6	71.82	5.54	263	2017-10-25	11	0	1	0	0	0	0	0	0	0	0		3	42	97	500	0		0		10
86-90	2017-10-17	Colorectal tumor	172	70	23.6614	1	0	0	0	1	1	1	0	1	0		0	0	1	0	0	133	40.4	85.6	5.03	107	2017-10-25	5	1	0	0	0	0	0	0	0	0	0	1	2	189	294	2100	0		0	350	100	250
41-45	2017-10-10	Colorectal tumor	161	59	22.7615	0	0	0	0	0	0	0	0	1	0		0	0	0	0	0	98	28.5	59.74	1.51		2017-10-25	5	1	0	0	0	0	0	0	0	0	0	2	2	393	482	6850	1	1500	1			300
61-65	2017-10-24	Thyroid tumor	155	61	25.3902	0	0	0	0	0	0	0	0	0	0		0	0	0	0	0	142	44.6	51.1	2.91		2017-10-26	11	0	1	0	0	0	0	0	0	0	0		2	31	81	500	0		0		10
91-95	2017-09-30	Fracture	158	35	14.0202	0	0	0	0	0	0	0	0	0	0		0	0	0	0	0	130	33.1	57.55	4.6	733	2017-10-09	3	0	0	1	0	0	0	0	0	0	0		3	67	145	1200	0		0	500	200	300
81-85	2017-09-13	Bladder tumor	165	74	27.1809	1	1	0	0	0	0	0	0	1	1	4	0	0	0	0	0	81	23.5	195.5	16.9	465	2017-09-20	8	0	0	0	0	0	0	1	0	0	0	2	3	193	342	3100	0		1	900	500	400
76-80	2017-10-10	PHPT	171	80	27.3588	0	0	1	0	0	0	1	1	0	0		0	0	0	0	0	113	36.4	111.4	6.15	153	2017-10-26	11	0	1	0	0	0	0	0	0	0	0		3	107	201	1000	0		0		10
81-85	2017-10-11	Bladder tumor	168	70	24.8016	1	0	1	1	0	0	1	0	1	0		0	0	0	0	0	118	35.2	103.3	7.37	144	2017-10-26	8	0	0	0	0	0	0	1	0	0	0	2	3	130	192	1600	1	500	0	600	100	500
56-60	2017-10-18	Retroperitoneal tumor	170	59	20.4152	1	1	1	0	0	0	0	0	1	0		0	0	1	0	0	120	40.4	91.72	6.74	77	2017-10-27	8	0	0	0	0	0	0	1	0	0	0	2	2	195	259	600	1	1000	1	2000	2000
81-85	2017-10-20	Colorectal tumor	174	72	23.7812	0	0	0	0	0	0	0	0	0	0		0	0	1	0	0	129	41.3	106.3	9.7	66	2017-10-27	5	1	0	0	0	0	0	0	0	0	0	1	2	129	440	2300	0		0	400	50	350
66-70	2017-10-19	Bladder tumor	168	62	21.9671	0	0	0	0	0	1	0	0	1	0		0	0	1	0	0	115	41.5	105.9	4.51		2017-10-23	8	0	0	0	0	0	0	1	0	0	0	2	2	243	304	4600	1	500	1	1100	1100
71-75	2017-10-26	Fracture	156	45	18.4911	1	0	0	1	0	0	0	0	0	0		0	0	0	1	0	129	39.1	70.6	10.41		2017-10-27	3	0	0	1	0	0	0	0	0	0	0		3	88	174	1100	0		0	400	100	300
71-75	2017-10-24	Colorectal tumor with hepatic metastases	157	89	36.1069	1	0	1	0	0	0	0	0	1	0		0	1	0	0	0	107	37.5	80.71	4.27		2017-10-30	5	1	0	0	0	0	0	0	0	0	0	1	3	168	243	1600	1	500	0	200	50	150
86-90	2017-10-27	Bladder tumor	175	80	26.1224	1	0	0	0	0	0	1	0	1	0		0	0	0	0	0	133	40.8	67.54	3.8	102	2017-10-31	8	0	0	0	0	0	0	1	0	0	0		3	32	75	500	0		0
81-85	2017-11-27	Gall bladder stone	164	57	21.1927	0	0	1	0	0	0	1	0	0	0		0	0	0	0	0	142	44.2	53.8	4.16	16	2017-11-29	5	1	0	0	0	0	0	0	0	0	0	1	2	79	122	600	0		0		10
81-85	2017-11-20	Gastric tumor	160	45	17.5781	0	0	0	0	0	0	0	0	1	0		0	0	0	0	1	80	34	85.2	3.35	149	2017-11-28	5	1	0	0	0	0	0	0	0	0	0	2	3	134	205	2750	1	500	0	400	300	100
56-60	2017-11-07	Colorectal tumor	167	56	20.0796	0	0	0	0	0	1	0	0	1	0		0	0	1	0	0	98	43.2	63.5	7.91	70	2017-11-29	5	1	0	0	0	0	0	0	0	0	0	1	3	178	298	2350	1	500	0	1250		1250
86-90	2017-11-21	Colorectal tumor	163	75	28.2284	0	0	0	0	0	0	0	0	1	0		0	0	0	0	1	134	41.8	79.13	7.67	466	2017-11-28	5	1	0	0	0	0	0	0	0	0	0	2	3	149	242	1600	0		0	300	10	300
61-65	2017-11-27	Biliary tumor	178	72	22.7244	0	0	0	0	0	0	0	0	1	0		0	0	1	0	1	147	40.1	100.6	5.09	178	2017-11-30	5	1	0	0	0	0	0	0	0	0	0	2	3	291	383	3100	0		0	750	200	550
61-65	2017-10-31	Thymoma	150	57	25.3333	0	0	0	0	0	0	0	0	0	0		0	0	0	0	1	117	39	69.69	5.97		2017-11-10	4	0	0	0	1	0	0	0	0	0	0	2	2	481	546	4800	1	1000	0	750		750
51-55	2017-11-23	Retroperitoneal tumor	165	78	28.6501	1	0	0	0	0	0	1	0	0	0		0	0	0	0	0	132	44.6	78.52	4.45		2017-11-27	8	0	0	0	0	0	0	1	0	0	0	2	3	205	317	9000	1	1500	1	4100	4000	100
76-80	2017-11-23	Colorectal tumor	170	70	24.2215	0	0	1	0	0	0	0	0	1	0		0	1	0	0	1	144	43.3	115.2	6.68		2017-11-30	5	1	0	0	0	0	0	0	0	0	0	1	2	117	195	1850	1	500	0	160	10	150
71-75	2017-12-01	Colorectal tumor	171	60	20.5191	1	0	0	0	0	0	0	0	1	0		0	0	0	0	1	114	33	85	4.5	27	2017-12-02	5	1	0	0	0	0	0	0	0	0	1	2	3	87	174	1500	1	500	0	570	20	550
66-70	2017-11-29	Bladder tumor	173	76	25.3934	1	1	1	0	0	0	0	0	1	0		0	0	1	0	0	145	45.4	93.5	6.27	61	2017-12-01	8	0	0	0	0	0	0	1	0	0	0		2	11	65	500	0		0
71-75	2017-12-01	Renal cyst	164	72	26.7698	1	1	0	0	0	0	1	0	0	0		0	0	0	1	0	130	44.1	112.6	9.52		2017-12-04	8	0	0	0	0	0	0	1	0	0	0	1	3	64	127	1000	0		0		10
56-60	2017-11-24	Esophageal tumor	158	70	28.0404	0	1	0	0	0	0	0	0	1	0		0	0	0	0	0	114	34.4	48.3	3.6	42	2017-11-28	4	0	0	0	1	0	0	0	0	0	0	2	2	625	746	8500	1	1500	1	3950	1600	2350
61-65	2017-11-30	Lung tumor	167	58	20.7967	0	0	1	0	0	0	1	0	1	0		0	0	1	0	0	127	45.3	63.93	5.57		2017-12-05	4	0	0	0	1	0	0	0	0	0	0	1	3	307	399	1600	0		0	400	50	350
61-65	2017-11-07	Obstructive jaundice	158	58	23.2335	1	0	0	0	0	1	0	0	1	0		0	0	0	0	0	91	33.4	57.4	3.48	52	2017-12-05	5	1	0	0	0	0	0	0	0	0	0	2	3	235	341	3400	1	500	0	1100	300	800
41-45	2017-12-07	Colorectal tumor	176	75	24.2123	0	0	0	0	0	0	0	0	1	0		0	0	1	0	1	141	39.5	79.6	4.45		2017-12-15	5	1	0	0	0	0	0	0	0	0	0	2	2	491	572	5300	1	1000	1	1550	800	750
76-80	2017-12-04	Biliary tumor	159	45	17.7999	1	1	1	0	0	0	1	0	1	0		0	0	0	0	1	97	31.9	108.94	6.67	147	2017-12-15	5	1	0	0	0	0	0	0	0	0	0	2	3	307	390	3200	1	500	1	1100	500	600
66-70	2017-12-11	Pancreas tumor	171	60	20.5191	1	0	0	0	0	0	0	0	1	0		0	0	0	0	0	136	45.3	63.9	3.65		2017-12-14	5	1	0	0	0	0	0	0	0	0	0	2	2	652	724	7500	1	1000	1	1300	700	600
81-85	2017-12-14	Gastric tumor	172	73	24.6755	1	0	0	0	1	1	0	0	1	0		0	0	0	0	1	89	33.2	62.1	4.2	65	2017-12-18	5	1	0	0	0	0	0	0	0	0	0	2	4	275	356	3100	0		0	550		550
66-70	2017-12-18	Ileus	165	92	33.7925	0	0	0	0	0	0	0	0	0	0		0	0	0	0	0	166	42.1	76	4.9		2017-12-18	5	1	0	0	0	0	0	0	0	0	1	2	2	144	201	4000	1	500	0	250	50	200
86-90	2017-12-18	Biliary stone	178	70	22.0932	1	0	0	0	0	0	0	0	0	0		0	0	0	0	0	115	28.4	110	7.3	104	2017-12-18	5	1	0	0	0	0	0	0	0	0	1	2	3	199	308	2600	1	500	0	350	100	250
76-80	2017-12-18	Bladder tumor	176	85	27.4406	1	0	1	0	0	0	1	0	1	0		0	0	0	0	0	162	46.8	97	3.76		2017-12-19	8	0	0	0	0	0	0	1	0	0	0		2	19	55	600	0		0
51-55	2017-12-18	Liver cirrhosis	175	70	22.8571	0	0	0	0	1	0	0	0	0	0		0	0	1	0	0	60	35.9	91.57	8.45		2017-12-19	5	1	0	0	0	0	0	0	0	0	0	2	3	361	415	3600	0		1	1000	200	800
91-95	2017-12-11	Gastric tumor	175	67	21.8776	0	0	0	0	0	0	1	1	1	0		0	0	0	0	0	100	35.8	77.3	6.09	96	2017-12-15	5	1	0	0	0	0	0	0	0	0	0	2	3	165	292	2800	0		0	400	10	400
66-70	2017-11-30	Thymoma	157	63	25.5588	1	0	0	0	0	0	0	0	0	0		0	0	0	1	0	121	40.7	71.56	6.72		2017-12-08	4	0	0	0	1	0	0	0	0	0	0	1	2	140	216	1100	0		0	150	50	100
56-60	2017-12-18	Renal stone	176	95	30.6689	1	1	0	0	0	1	0	0	0	0		0	0	0	1	0	151	45.8	97.2	5.8		2017-12-20	8	0	0	0	0	0	0	1	0	0	0		3	80	136	1100	0		0
86-90	2017-12-15	Fracture	164	50	18.5901	1	0	0	0	0	0	1	0	0	0		0	0	0	0	0	109	37.1	70.87	7.52	424	2017-12-19	3	0	0	1	0	0	0	0	0	0	0		3	65	157	1200	0		0	220	200	20
51-55	2017-12-08	Gastric tumor	174	95	31.378	1	0	1	0	0	0	0	0	1	0		0	0	1	1	0	121	44.1	81.8	4.92		2017-12-20	5	1	0	0	0	0	0	0	0	0	0	2	2	242	305	2350	1	500	0	400	100	300
61-65	2017-12-18	Gastric tumor	172	65	21.9713	0	0	0	0	0	0	1	0	1	0		0	0	1	0	0	135	39.6	78.77	4.94		2017-12-21	5	1	0	0	0	0	0	0	0	0	0	2	2	397	451	5950	1	1000	0	1100	300	800
51-55	2017-12-20	Bladder tumor	175	72	23.5102	1	0	0	0	0	0	0	0	1	0		0	0	1	1	0	148	48.6	72.8	4.92	31	2017-12-22	8	0	0	0	0	0	0	1	0	0	0	1	2	426	510	6850	1	1500	1	1100	400	700
51-55	2017-12-11	Lung tumor	163	85	31.9922	1	0	0	0	0	0	1	0	1	0		0	0	1	0	0	163	42.1	86.77	6.51		2017-12-22	4	0	0	0	1	0	0	0	0	0	0	1	2	224	309	1600	1	500	0	400	50	350
81-85	2017-12-07	Ureteral tumor	176	91	29.3776	0	1	1	0	0	0	0	0	1	0		0	0	0	0	0	130	41.3	61.69	5.52	484	2017-12-11	8	0	0	0	0	0	0	1	0	0	0	2	3	176	236	1700	0		0	630	100	530
61-65	2017-12-23	Gastric stone	166	80	29.0318	1	1	0	0	0	0	0	0	0	1	4	1	1	0	0	0	104	43	193	13.24		2017-12-23	5	1	0	0	0	0	0	0	0	0	1	2	3	169	239	2000	1	500	0	470	20	450
71-75	2017-12-19	Lung tumor	165	62	22.7732	0	0	0	0	1	0	0	0	1	0		0	0	0	0	0	97	40.5	57.3	5.49	37	2017-12-25	4	0	0	0	1	0	0	0	0	0	0	1	2	193	264	1600	0		0	250	50	200
71-75	2017-12-18	Colorectal tumor	170	80	27.6817	1	1	0	0	0	0	0	0	1	0		0	0	1	1	0	109	39.2	93.7	3.85	102	2017-12-25	5	1	0	0	0	0	0	0	0	0	0	2	2	282	276	3350	1	500	0	400	50	350
81-85	2017-12-21	Fracture	156	80	32.8731	1	1	0	0	0	0	1	0	0	0		0	0	0	0	0	108	39	71.1	5.96		2017-12-25	3	0	0	1	0	0	0	0	0	0	0		3	63	151	1600	0		0	200	150	50
71-75	2017-12-12	Pancreas tumor	160	45	17.5781	1	0	0	0	0	0	0	0	1	0		0	0	0	0	0	98	38.6	40.4	3.7	46	2017-12-20	5	1	0	0	0	0	0	0	0	0	0	2	2	363	432	5300	1	500	0	1200	200	1000
76-80	2017-12-25	BPH	176	85	27.4406	1	0	1	0	0	0	1	0	0	0		0	0	0	0	0	126	37.9	108.51	6.85		2017-12-26	8	0	0	0	0	0	0	1	0	0	0		3	74	103	1000	0		0	400	400
61-65	2017-12-22	Renal stone	148	60	27.3923	1	0	0	0	0	0	1	0	0	0		0	0	0	0	0	121	44.3	114	7.63		2017-12-25	8	0	0	0	0	0	0	1	0	0	0	2	2	265	333	2700	0		0	100	100
76-80	2017-12-26	Bladder tumor	176	84	27.1178	0	0	0	0	0	0	0	0	1	0		0	0	0	0	0	142	40.1	91.51	5.83		2017-12-26	8	0	0	0	0	0	0	1	0	0	0		2	13	80	500	0		0
66-70	2017-12-01	Obstructive jaundice	170	52	17.9931	0	0	0	0	0	0	0	0	1	0		0	0	1	0	0	89	36	58.83	6.51	86	2017-12-26	5	1	0	0	0	0	0	0	0	0	0	2	2	338	424	5500	1	1000	0	2000	1400	600
66-70	2017-12-19	Colorectal tumor	168	60	21.2585	1	0	0	0	0	0	0	0	1	0		0	0	1	1	0	114	36.2	58.19	4.63		2017-12-27	5	1	0	0	0	0	0	0	0	0	0	1	3	179	269	2850	1	500	0	420	20	400
76-80	2017-12-22	BPH	162	57	21.7193	0	0	1	1	0	0	0	0	0	0		0	0	1	1	0		44.7	108.8	8.44	109	2017-12-26	8	0	0	0	0	0	0	1	0	0	0		3	63	97	1100	0		0
31-35	2017-12-26	Adrenal tumor	153	57	24.3496	1	0	0	0	0	0	0	0	0	0		0	0	0	0	0	126	45.7	57.5	5.16	14	2017-12-28	8	0	0	0	0	0	0	1	0	0	0	1	2	49	127	2300	1	500	0	300	10	300
36-40	2017-12-27	Retroperitoneal tumor	175	82	26.7755	0	0	0	0	0	0	0	0	0	0		0	0	0	0	0	138	46	89	5.79		2017-12-28	8	0	0	0	0	0	0	1	0	0	0	1	1	134	211	2200	1	500	0	500	200	300
51-55	2017-12-25	GIST	171	84	28.7268	1	1	0	0	0	0	0	0	0	0		0	0	1	0	1	146	43.7	82.55	6.22	122	2017-12-28	5	1	0	0	0	0	0	0	0	0	0	2	2	461	553	9300	1	1500	1	2500	1400	1100
61-62	2017-12-26	Pelvic tumor	155	52	21.6441	1	0	0	0	0	0	0	0	1	0		0	0	0	0	0	64	32	103.1	7.46	376	2017-12-27	7	0	0	0	0	0	1	0	0	0	0	2	3	176	236	2700	1	500	1	800	700	100
56-60	2017-12-28	Breast tumor	165	76	27.9155	1	0	1	1	0	0	0	0	1	0		0	0	0	1	0	134	48.5	72.94	7.12		2017-12-28	11	0	1	0	0	0	0	0	0	0	0		3	80	130	1500	1	500	0	450	450
51-55	2017-12-28	Adrenal tumor	169	81	28.3604	0	0	0	0	0	0	0	0	0	0		0	0	0	0	0	157	46.1	81.89	6.36	20	2017-12-29	8	0	0	0	0	0	0	1	0	0	0	1	2	104	172	2000	1	500	0		10
91-95	2017-12-27	Bladder tumor	165	60	22.0386	0	0	0	0	0	0	0	0	1	0		0	0	0	0	0	112	29.4	79.7	10.47	267	2017-12-29	8	0	0	0	0	0	0	1	0	0	0		3	18	64	1000	1	500	0		10
41-45	2018-01-25	Ileus	176	47	15.173	0	0	0	0	0	0	0	0	0	0		0	0	1	0	1	50	28.3	37.97	5.31		2018-02-02	5	1	0	0	0	0	0	0	0	0	1	2	3	268	361	4500	1	1000	1	1050	200	850
61-65	2018-01-22	Colorectal tumor	160	80	31.25	1	0	0	0	0	0	1	0	1	0		0	0	0	0	0	82	39.9	68.11	5.04	201	2018-01-31	5	1	0	0	0	0	0	0	0	0	0	1	2	398	466	7000	1	1500	1	1600	600	1000
66-70	2018-02-02	Bladder tumor	166	72	26.1286	0	0	1	0	0	1	1	0	1	0		0	0	1	0	0	140	41.8	80.12	4.6		2018-02-05	8	0	0	0	0	0	0	1	0	0	0		2	10	60	1000	1	500	0
61-65	2018-01-29	Bladder tumor	165	58	21.3039	0	0	1	0	0	1	0	0	1	0		0	0	0	0	0	109	36.8	84.24	6.49	705	2018-02-01	8	0	0	0	0	0	0	1	0	0	0	2	3	163	216	4900	1	1000	1	1000	1000
71-75	2018-01-30	Spinal tumor with fracture	165			1	0	0	0	0	0	1	0	1	0		0	0	0	1	0	125	34.4	70.3	6.26		2018-02-02	3	0	0	1	0	0	0	0	0	0	0		3	337	453	5050	1	1000	1	2950	2000	950
71-75	2018-01-29	Colorectal tumor	156	60	24.6548	1	0	0	0	0	0	0	0	1	0		0	0	0	0	0	132	46.3	69.35	5.86		2018-02-05	5	1	0	0	0	0	0	0	0	0	0	1	3	222	280	2700	1	500	0	800	10	800
86-90	2018-02-04	Fracture	150	47.5	21.1111	1	0	0	0	0	0	0	0	0	0		0	0	0	1	0	82	37.7	75.5	7.68	90	2018-02-06	3	0	0	1	0	0	0	0	0	0	0		3	92	247	1600	0		0	420	200	220
61-65	2018-01-24	Lung tumor	158	67.5	27.0389	1	1	0	0	0	0	0	0	1	0		0	0	0	1	0	153	50.1	96	4.12		2018-02-06	4	0	0	0	1	0	0	0	0	0	0	1	2	165	236	1300	0		0	300	50	250
61-65	2018-01-18	Thymoma	162	68	25.9107	0	0	0	0	0	0	0	0	1	0		0	0	0	0	0	125	39.8	70.3	5.48		2018-02-07	4	0	0	0	1	0	0	0	0	0	0	2	2	385	500	2600	0		0	450	150	300
56-60	2018-01-29	Lung tumor	162	66	25.1486	0	1	1	0	0	0	1	0	1	0		0	0	1	0	1	145	39.2	78.97	4.15		2018-02-07	4	0	0	0	1	0	0	0	0	0	0	1	3	192	266	2000	1	500	0	550	50	500
51-55	2018-02-06	Endometrial tumor	157	90	36.5126	1	0	0	0	0	0	0	0	1	0		0	0	0	0	0	146	43.5	66.7	5.33		2018-02-08	7	0	0	0	0	0	1	0	0	0	0	2	2	170	247	2000	0		0	600	50	550
61-65	2018-01-26	Colorectal tumor	172	76	25.6896	0	0	0	0	0	1	0	0	1	0		0	0	1	0	0	136	39.7	109.15	7.93		2018-02-07	5	1	0	0	0	0	0	0	0	0	0	1	2	204	302	2850	1	500	0	1600	200	1400
66-70	2018-01-29	Lung tumor	169	70	24.5089	0	0	1	0	0	0	0	0	1	0		0	0	1	1	0	126	35.5	81.5	6.06		2018-02-08	4	0	0	0	1	0	0	0	0	0	0	1	3	223	320	2800	1	500	0	320	200	120
61-65	2018-01-30	Colorectal tumor	162	60	22.8624	0	1	0	0	0	0	0	0	1	0		0	0	0	0	0	85	32.3	47.7	4.83	172	2018-02-08	5	1	0	0	0	0	0	0	0	0	0	2	3	368	454	5550	1	1000	1	2100	1500	600
66-70	2018-01-30	Colorectal tumor	156	60	24.6548	1	1	1	1	0	0	0	0	1	1	4	0	0	0	1	0	94	34.8	181.09	9.46	1625	2018-02-07	5	1	0	0	0	0	0	0	0	0	0	1	3	257	384	2600	1	500	0	700	100	600
66-70	2018-02-02	Colorectal tumor	172	90	30.4218	0	0	1	0	0	0	0	0	1	0		0	0	0	1	1	148	44.3	97.5	5.34	18	2018-02-09	5	1	0	0	0	0	0	0	0	0	0	2	3	256	333	2600	1	500	0	400	200	200
51-55	2018-02-08	Adrenal tumor	163	62	23.3355	0	1	0	0	0	0	0	0	0	0		0	0	0	0	0	117	37.7	64.28	4.92		2018-02-11	8	0	0	0	0	0	0	1	0	0	0	1	2	98	208	3100	1	500	0	200	10	200
76-80	2018-01-29	GIH	156	55	22.6003	1	1	0	0	0	0	0	0	1	0		0	0	0	0	1	97	34.7	106.2	4.66	192	2018-02-11	5	1	0	0	0	0	0	0	0	0	0	2	3	202	260	2350	1	500	0	400	150	250
41-45	2018-02-10	Duodenum tumor	168	55	19.487	0	0	0	0	0	0	0	0	0	0		0	0	0	0	0	122	33.6	78.7	5.82		2018-02-10	5	1	0	0	0	0	0	0	0	0	1	2	3	165	230	3600	0		0	400	10	400
26-30	2018-02-08	Pregnancy	162	70	26.6728	0	1	0	0	0	0	0	0	0	0		0	0	0	0	0	135	32.7	56.8	2.75	108	2018-02-09	7	0	0	0	0	0	1	0	0	0	1	2	3	38	89	1000	0		0	400	300	100
91-95	2018-02-11	Biliary stone	160	48	18.75	0	0	0	0	0	1	0	0	0	0		0	0	1	0	0	131	31.6	82.35	9.69	414	2018-02-12	5	1	0	0	0	0	0	0	0	0	1	2	3	101	186	2100	0		0	50	10	50
61-65	2018-02-12	Deep infection of neck	172	85	28.7317	1	0	0	0	0	0	0	0	0	0		0	0	0	0	0		27.8				2018-02-12	12	0	0	0	0	0	0	0	0	0	1		4	252	311	2100	1	500	0	750	200	550
61-65	2018-02-02	Spinal osteoarthritis	180	80	24.6914	0	0	0	0	0	0	0	0	1	0		0	0	0	0	0	100	29.6	57.55	5.62	254	2018-02-22	3	0	0	1	0	0	0	0	0	0	0		3	256	347	3650	1	1000	0	900	400	500
61-65	2018-02-22	Lung tumor	162	83	31.6263	1	0	0	0	0	0	0	0	1	0		0	0	0	0	0	131	38.9	78	6.08		2018-02-23	4	0	0	0	1	0	0	0	0	0	0	2	2	321	400	1200	0		0	400	200	200
66-70	2018-01-26	Duodenum tumor	170	62	21.4533	0	0	0	0	0	0	0	0	1	0		0	0	1	0	0	148	45.6	86.9	5.88	59	2018-01-30	5	1	0	0	0	0	0	0	0	0	0	2	2	242	318	4000	1	500	1	450	300	150
81-85	2018-02-06	GIH	171	70	23.939	1	0	0	0	0	0	0	0	1	0		0	0	0	0	0	92	33.2	116.7	13.79	61	2018-02-24	5	1	0	0	0	0	0	0	0	0	0	2	3	231	314	3350	1	500	0	500	300	200
41-45	2018-02-26	Pregnancy with preeclampsia	165	70	25.7117	0	0	0	0	0	0	0	0	0	0		0	0	0	0	0	112	31.5	102.7	6.42	94	2018-02-26	7	0	0	0	0	0	1	0	0	0	1	2	4	64	81	2000	1	1000	0	700	500	200
81-85	2018-02-23	BPH	160	70.5	27.5391	0	0	0	0	0	0	0	0	0	0		0	0	0	0	0	147	40.9	90.5	6.22	75	2018-02-26	8	0	0	0	0	0	0	1	0	0	0		3	88	136	1700	1	500	0
61-65	2018-02-22	Colorectal tumor	170	67	23.1834	0	0	1	0	0	0	0	0	1	0		0	0	0	0	0	144	44	85.1	6.01		2018-02-26	5	1	0	0	0	0	0	0	0	0	0	1	2	139	212	3100	0		0	1200	50	1150
56-60	2018-02-22	Liver tumor	172	80	27.0416	1	1	1	0	1	0	0	0	1	0		0	0	0	0	1	148	49.5	71.1	5.9		2018-02-27	5	1	0	0	0	0	0	0	0	0	0	2	3	177	286	3500	1	1000	0	1200	600	600
71-75	2018-02-26	BPH	170	82	28.3737	1	0	1	0	0	0	0	0	0	0		0	0	0	0	0	126	35.7	72.96	3.89	133	2018-02-28	8	0	0	0	0	0	0	1	0	0	0		3	39	118	1500	0		0
66-70	2018-02-23	Endometrial tumor	162	60	22.8624	1	1	1	0	0	0	0	0	1	0		0	0	0	0	0	129	41.2	70.8	5.11	141	2018-02-28	7	0	0	0	0	0	1	0	0	0	0	2	3	125	197	1500	1	500	0	600	100	500
46-50	2018-04-12	Gastric tumor	163	57	21.4536	0	0	0	0	0	0	0	0	1	0		0	0	0	0	0	119	45.6	54	4.73		2018-04-27	5	1	0	0	0	0	0	0	0	0	0	2	2	615	756	10100	1	2500	1	6150	4000	2150
66-70	2018-04-23	Colorectal tumor	166	60	21.7738	0	0	0	0	0	1	0	0	1	0		0	0	1	0	1	130	45.2	84.85	7.18	26	2018-04-27	5	1	0	0	0	0	0	0	0	0	0	2	3	125	208	2600	0		0	150	50	100
76-80	2018-04-23	Ileus	145	50	23.7812	0	0	0	0	0	1	0	0	1	0		0	0	0	0	1	113	30	63.2	5.53	74	2018-04-24	5	1	0	0	0	0	0	0	0	0	1	2	3	155	247	3500	1	1000	0	100	10	100
71-75	2018-04-27	Bladder tumor	178	96	30.2992	1	1	1	1	0	0	1	0	1	0		0	0	0	0	0	160	41	75.8	6.09		2018-04-28	8	0	0	0	0	0	0	1	0	0	0		3	12	92	500	0		0
61-65	2018-04-16	Pelvic tumor	161.5	61.5	23.5793	0	0	0	0	0	0	0	1	1	0		0	0	0	0	0	121	34			136	2018-04-28	7	0	0	0	0	0	1	0	0	0	0	1	2	79	121	500	0		0		10
76-80	2018-04-25	BPH	158	70	28.0404	1	1	1	0	0	0	0	0	0	0		0	0	0	0	0	149	44.3	84.92	6.57		2018-04-28	8	0	0	0	0	0	0	1	0	0	0		3	58	105	1100	0		0	400	400
56-60	2018-06-26	Retroperitoneal tumor	176	70.5	22.7596	0	1	0	0	0	0	0	0	0	0		0	0	0	0	0	115	35.9	88.93	5.49		2018-06-29	8	0	0	0	0	0	0	1	0	0	0	2	3	195	303	3800	1	1000	0	900	200	700
21-25	2018-06-13	Castleman disease	168	50	17.7154	0	0	0	0	0	0	0	0	0	0		0	0	0	0	0	134	28.9	53.6	2.36		2018-06-29	5	1	0	0	0	0	0	0	0	0	0	1	2	173	260	5043	1	1000	1	700	300	400
56-60	2018-06-26	Adrenal tumor	164	55	20.4491	1	0	0	0	0	0	1	0	0	0		0	0	1	0	0	154	46.5	82.3	6.65	22	2018-06-27	8	0	0	0	0	0	0	1	0	0	0	1	2	70	127	3100	1	500	0	800	50	750
66-70	2018-06-13	Colorectal tumor	157	64	25.9645	1	0	1	0	0	0	0	0	1	0		0	0	0	0	0	91	42.6	51.7	3.6	26	2018-06-30	5	1	0	0	0	0	0	0	0	0	0	1	3		310	2600	1	500	0	1000	50	950
56-60	2018-06-25	Gastric tumor	165	79	29.0174	0	0	0	0	0	0	0	0	1	0		0	0	1	0	1	146	40.3	68.1	6.01		2018-06-29	5	1	0	0	0	0	0	0	0	0	0	1	2	157	294	2600	1	500	0	650	50	600
51-55	2018-06-06	Bladder tumor	170	79	27.3356	1	1	1	1	0	0	1	0	1	0		0	0	1	1	0	83	35.9	70.8	5.7	826	2018-06-20	8	0	0	0	0	0	0	1	0	0	0		3	185	232	1600	0		0
61-65	2018-06-07	Mediastinitis	150	59	26.2222	1	1	1	0	0	0	0	0	0	0		0	0	0	0	0	135	47.4	58.89	5.37		2018-06-20	3	0	0	1	0	0	0	0	0	0	0	2	3	142	309	1500	1	500	0	950	400	550
61-65	2018-06-14	Colorectal tumor	180	83	25.6173	1	1	1	0	0	0	0	0	1	0		0	0	1	0	0	142	42.8	76.6	5.04		2018-06-21	5	1	0	0	0	0	0	0	0	0	0	2	3	116	194	3000	1	500	0	800	10	800
61-65	2018-06-20	BPH	156	70	28.764	0	0	1	0	0	0	0	0	0	0		0	0	0	0	0	140	36.6	74.5	5.3		2018-06-21	8	0	0	0	0	0	0	1	0	0	0		2	30	103	1100	0		0
41-45	2018-05-28	Adrenal tumor	160	61.5	24.0234	1	1	0	0	0	0	0	0	0	0		0	0	0	0	0	127	38	69.2	3.69	32	2018-06-20	8	0	0	0	0	0	0	1	0	0	0	1	3	101	171	3500	1	1000	1	650	50	600
51-55	2018-06-14	Duodenum tumor	170	77	26.6436	1	0	0	0	0	0	0	0	1	0		0	0	0	0	0	165	45.9	59.46	9.44	10	2018-06-15	5	1	0	0	0	0	0	0	0	0	1	2	3	242	347	3600	1	500	0	750	300	450
56-60	2018-06-20	Adrenal tumor	163	65	24.4646	1	0	0	0	0	0	0	0	0	0		0	0	0	0	0	161	44	89.7	6.21	31	2018-06-22	8	0	0	0	0	0	0	1	0	0	0	1	2	52	119	3200	1	1000	1	400	10	400
66-70	2018-06-13	Bladder tumor	169	95	33.2621	1	1	1	0	0	0	0	0	1	0		0	1	0	0	0	132	41.9	120.2	12.69	18	2018-06-22	8	0	0	0	0	0	0	1	0	0	0	2	3	163	281	2800	1	1000	1	1200	1200
96-100	2018-06-20	Digestive tract perforation	156	55	22.6003	1	0	0	0	0	0	0	0	0	0		0	0	0	0	0	125	22.5	124.7	8.15	125	2018-06-21	5	1	0	0	0	0	0	0	0	0	1	2	3	186	311	3500	1	500	0	150	50	100
81-85	2018-06-15	Pelvic tumor	156	60	24.6548	0	0	0	0	0	0	1	0	0	0		0	0	0	1	0	111	27.1	60.8	5.89	166	2018-06-22	7	0	0	0	0	0	1	0	0	0	0	2	3	98	201	1200	0		0	550	10	550
66-70	2018-06-22	Ureteral tumor	156	50	20.5457	1	0	0	0	0	0	0	0	1	0		0	1	0	0	0	121	43.4	84	4.72	52	2018-06-25	8	0	0	0	0	0	0	1	0	0	0	2	2	80	135	1600	0		0
81-85	2018-06-24	Ileus	173	58	19.3792	0	0	0	0	0	0	0	0	1	0		0	0	0	0	0	99	27	70.45	4.57	260	2018-06-25	5	1	0	0	0	0	0	0	0	0	1	1	3	263	360	2100	0		0	700	150	550
86-90	2018-06-14	Pancreas tumor	178	80	25.2493	0	1	1	0	0	1	0	0	1	0		0	0	0	0	0	126	30.3	64.91	8.96	147	2018-06-20	5	1	0	0	0	0	0	0	0	0	0	2	4	429	503	4200	1	1000	0	1100	300	800
81-85	2018-06-19	BPH	170	65	22.4913	0	0	1	0	0	0	0	0	0	0		0	0	0	0	0	138	41.8	112.2	7.33		2018-06-26	8	0	0	0	0	0	0	1	0	0	0		2	42	89	1100	0		0
81-85	2018-06-04	Ileus	156	45	18.4911	1	0	0	0	0	0	0	0	1	0		0	0	0	0	0	91	34.1	54.5	3.63	135	2018-06-25	5	1	0	0	0	0	0	0	0	0	0	1	3	212	265	3100	1	500	0	650	50	600
76-80	2018-06-19	Bladder tumor	156	68	27.9421	1	0	0	0	0	0	0	0	1	0		0	0	0	0	0	120	38.1	86.64	10.5	89	2018-06-28	8	0	0	0	0	0	0	1	0	0	0	1	2	108	183	1500	0		0
76-80	2018-06-19	Colorectal tumor	175	77	25.1429	1	1	0	0	0	0	1	0	1	0		0	0	0	1	0	128	46.1	89.7	4.51	16	2018-06-26	5	1	0	0	0	0	0	0	0	0	0	2	2	172	237	1600	1	500	0	700	10	700
76-80	2018-06-13	Colorectal tumor with hepatic metastases	168	70	24.8016	0	1	1	0	0	0	0	0	1	0		0	0	0	0	0	148	45.6	57.3	3.91		2018-06-27	5	1	0	0	0	0	0	0	0	0	0	2	3	300	468	3100	1	500	0	700	50	650
71-75	2017-06-29	Bladder tumor	168	70	24.8016	1	0	0	0	0	0	1	0	1	0		0	0	1	1	0	144	41.9	111	8.94		2017-06-30	8	0	0	0	0	0	0	1	0	0	0		3	10	61	500	0		0	10	10	0
71-75	2017-06-28	Adrenal tumor	154	60	25.2994	1	1	1	0	0	0	0	0	1	0		0	0	0	0	0	135	46.2	74	7.95	175	2017-06-30	8	0	0	0	0	0	0	1	0	0	0	1	3	103	177	2500	0		0	410	10	400
31-35	2017-06-29	Pregnancy with preeclampsia	160	126	49.2188	1	0	0	0	0	0	0	0	0	0		0	0	0	0	0	112	28.1	51.8	4.13	13	2017-06-30	7	0	0	0	0	0	1	0	0	0	0	2	3	112	165	2900	1	500	1	1750	1200	550
66-70	2017-06-19	Colorectal tumor	172	70	23.6614	0	0	1	0	0	1	0	0	1	0		0	0	1	0	0	111	30.2	100.86	4.78	224	2017-06-28	4+5	0	0	0	0	0	0	0	0	0	0	1	3	408	480	3600	1	1000	0	1150	200	850
76-80	2017-06-09	Lung tumor	172	80	27.0416	1	1	0	0	0	1	0	0	1	0		0	0	1	0	0	146	37.5	82.44	7.3	41	2017-06-27	4	0	0	0	1	0	0	0	0	0	0	1	3	249	337	2100	1	500	0	400	200	200
81-85	2017-06-22	Colorectal tumor	153	45	19.2234	1	0	0	1	0	1	1	0	1	0		0	0	0	0	0	88	38.3	97.51	6.18	45	2017-06-28	5	1	0	0	0	0	0	0	0	0	0	1	3	154	244	3400	1	500	1	400	100	300
86-90	2017-06-21	Gastric tumor	156	51	20.9566	1	0	0	0	0	1	0	0	1	0		0	0	0	0	0	96	39	68.84	6.29		2017-06-30	5	1	0	0	0	0	0	0	0	0	0	2	3	179	248	2850	1	500	1	500	100	400
61-65	2017-06-28	Cerebral tumor	174	57	18.8268	0	1	1	0	0	1	0	0	1	0		0	0	0	0	0	129	38.4	75.4	5.08		2017-07-03	6	0	0	0	0	1	0	0	0	0	0		3	230	380	3950	1	500	0	1600	150	1450
61-65	2017-06-27	Gastric tumor	160	91	35.5469	0	0	1	0	0	0	0	0	1	0		0	0	0	0	0	121	38.8	66.88	3.28		2017-07-04	5	1	0	0	0	0	0	0	0	0	0	2	2	197	291	2100	1	500	0	1030	30	1000
36-40	2017-06-19	Adrenal tumor	162	64	24.3865	1	0	0	0	0	0	0	0	1	0		0	0	0	0	0	79	44.8	58.5	3.87	117	2017-07-04	8	0	0	0	0	0	0	1	0	0	0	1	2	67	155	1500	0		0	620	20	600
36-40	2017-06-10	VHLsyndrome	173	45	15.0356	0	1	0	0	0	0	0	0	1	0		0	0	0	0	0	154	32.9	81.74	8.5	29	2017-07-04	6	0	0	0	0	1	0	0	0	0	0		2	403	477	4350	1	1000	0	2150	400	1750
66-70	2017-06-22	Colorectal tumor	157	53	21.5019	1	1	0	0	0	0	0	1	1	0		0	0	0	0	0	83	42.8	68.7	3.37		2017-07-01	5	1	0	0	0	0	0	0	0	0	1	1	3	170	238	2800	1	1000	0	10	10	NA
56-60	2017-06-26	Retroperitoneal tumor	170	74	25.6055	1	1	0	0	0	0	0	0	1	0		0	0	0	0	0	157	42.9	82.7	6.04	21	2017-07-05	8	0	0	0	0	0	0	1	0	0	0	2	2	251	332	8350	1	1500	1	3400	2500	900
81-85	2017-07-01	Duodenum tumor	150	50	22.2222	1	0	1	0	0	0	0	0	1	0		0	0	0	0	0	128	37.7	73.8	7.97		2017-07-03	5	1	0	0	0	0	0	0	0	0	0	2	3	274	357	3600	1	500	0	400	50	350
61-65	2017-06-30	Pancreas tumor	161	59	22.7615	1	0	0	0	0	0	0	0	1	0		0	0	0	0	0	108	37.1	65	3.59		2017-07-05	5	1	0	0	0	0	0	0	0	0	0	2	3	435	516	6600	1	1000	1	3050	1200	1850
81-85	2017-07-04	BPH	167	83	29.7608	1	0	1	0	0	0	0	0	0	0		0	0	1	0	0	137	38.2	170.79	10.62		2017-07-06	8	0	0	0	0	0	0	1	0	0	0		3	29	67	600	0		0	10	10	NA
66-70	2017-06-19	Mediastinitis	170	65	22.4913	0	1	1	0	0	0	1	1	0	0		0	0	0	0	0	105	40.9	69.29	5.78		2017-06-27	4	0	0	0	1	0	0	0	0	0	0	2	3	117	182	1100	0		0	100	100	NA
51-55	2017-06-21	Arterial aneurysm	170	85	29.4118	0	0	0	0	0	0	0	0	0	0		0	0	1	0	0	152	41.1	74.38	6.5		2017-07-06	6	0	0	0	0	1	0	0	0	0	0		2	681	796	4700	1	1000	1	3500	500	3000
56-60	2017-07-05	Retroperitoneal tumor	160	50	19.5312	0	0	0	0	0	0	0	0	1	0		0	0	0	0	0	144	45.1	70.3	6.68		2017-07-07	8	0	0	0	0	0	0	1	0	0	0	2	2	206	257	2300	1	500	0	650	100	550
51-55	2017-07-05	Retroperitoneal tumor	152	52	22.5069	1	1	0	0	0	0	0	0	1	0		0	0	0	0	0	136	44.2	63.5	4.47		2017-07-07	8	0	0	0	0	0	0	1	0	0	0	1	3	109	167	3800	1	1000	0	700	100	600
61-65	2017-08-21	Colorectal tumor	164	68	25.2826	1	0	1	0	0	0	0	0	1	0		0	0	1	0	0	141	45.7	88.3	4.99		2017-08-30	5	1	0	0	0	0	0	0	0	0	0	1	3	139	213	1750	1	500	0	750	50	700
61-65	2017-08-21	Colorectal tumor	180	60	18.5185	1	0	0	0	0	0	0	0	1	0		0	0	1	1	0	122	43.5	70.3	4.35	378	2017-08-31	5	1	0	0	0	0	0	0	0	0	0	2	3	207	289	1350	0		0	750	300	450
61-65	2017-09-03	Colorectal tumor	169	65	22.7583	1	0	0	0	0	0	0	0	1	0		0	0	0	1	0	152	31.5	128	6.03		2017-09-03	5	1	0	0	0	0	0	0	0	0	1	2	2	245	334	8925	1	1500	1	1200	800	400
51-55	2017-08-22	Colorectal tumor	160	66	25.7812	1	1	0	0	0	0	0	0	1	0		0	0	0	0	0	139	37.6	67.7	5.55		2017-09-01	5	1	0	0	0	0	0	0	0	0	0	1	3	136	215	1600	0		0	900	50	850
46-50	2017-08-29	Gastric tumor	163	40	15.0551	1	0	0	0	0	0	0	1	1	1	4	0	0	0	0	0	83	19.9	264.18	10.59		2017-08-30	5	1	0	0	0	0	0	0	0	0	0	1	3	152	218	1600	0		0	10	10	NA
76-80	2017-08-31	Ileus	150	50	22.2222	1	1	0	1	0	0	0	0	1	0		0	0	0	0	0	82	16.4	46	13.86		2017-08-31	5	1	0	0	0	0	0	0	0	0	1	2	3	150	258	3050	1	500	0	110	10	100
16-20	2017-08-15	Ileus	175	75	24.4898	0	0	0	0	0	0	0	0	1	0		0	0	0	0	0	81	33	46.5	2.97	29	2017-08-31	5	1	0	0	0	0	0	0	0	0	0	2	3	105	137	1900	0		1	710	10	700
86-90	2017-09-01	Bladder tumor	165	55	20.202	1	0	0	0	0	0	0	0	1	0		0	0	0	0	0	136	41	80.8	10.25		2017-09-04	8	0	0	0	0	0	0	1	0	0	0		3	45	86	700	0		0	700	100	NA
81-85	2017-08-30	Breast tumor	154	59	24.8777	1	1	1	0	0	0	0	0	1	0		0	0	0	1	0	105	34.5	104.57	7.68	114	2017-09-04	11	0	1	0	0	0	0	0	0	0	0		3	77	148	1000	0		0	10	10	NA
71-75	2017-08-28	Colorectal tumor	165	62	22.7732	1	1	1	0	0	0	0	0	1	0		0	0	0	0	0	148	45.9	67.99	6.73	49	2017-09-04	5	1	0	0	0	0	0	0	0	0	0	1	3	151	283	1600	0		0	500	50	450
76-80	2017-08-25	Colorectal tumor	150	67	29.7778	1	1	0	0	0	0	0	0	1	0		0	0	0	0	0	116	40.9	60.2	4.4	279	2017-09-05	5	1	0	0	0	0	0	0	0	0	0	1	2	272	485	3100	1	500	0	500	100	400
81-85	2017-09-01	BPH	160	48	18.75	0	0	0	0	0	0	0	0	0	0		0	0	0	0	0	133	40.9	84.7	7.15		2017-09-05	8	0	0	0	0	0	0	1	0	0	0		2	58	117	1600	1	500	0	10	10	NA
81-85	2017-08-22	Gall bladder tumor	147	47	21.7502	1	0	1	0	0	0	0	0	1	0		0	0	0	0	0	114	46	75.6	6.72		2017-09-06	5	1	0	0	0	0	0	0	0	0	0	2	3	173	264	2100	1	500	0	650	200	350
56-60	2017-08-28	Biliary tumor	154	70	29.5159	0	0	0	0	0	0	0	0	1	0		0	0	0	0	0	132	42.1	50.75	5.08	26	2017-09-07	5	1	0	0	0	0	0	0	0	0	0	2	2	657	752	10700	1	2500	1	5900	3800	1500
76-80	2017-09-01	Bladder tumor	175	51	16.6531	1	0	0	0	0	0	0	0	1	0		0	0	1	0	0	118	36.7	146	11.82	114	2017-09-07	8	0	0	0	0	0	0	1	0	0	0		3	35	104	500	0		0	10	10	NA
51-55	2017-09-04	Bladder tumor	173	75	25.0593	1	0	1	0	0	0	0	0	1	0		0	0	1	0	0	170	43.6	94.2	6.46	153	2017-09-08	8	0	0	0	0	0	0	1	0	0	0	2	3	202	301	4200	1	500	0	2000	2000	NA
56-60	2017-09-01	Cerebral hernia	170	70	24.2215	1	0	0	0	0	0	1	0	0	0		0	0	0	0	0	144	34.1	74	4.6	37	2017-09-01	6	0	0	0	0	1	0	0	0	0	1		4	227	269	3250	1	500	1	4850	1200	3650
41-45	2017-08-24	Colorectal tumor	175	125	40.8163	0	0	0	0	0	0	0	0	1	0		0	0	0	0	0	85	24.7	79.84	3.46		2017-09-06	5	1	0	0	0	0	0	0	0	0	0	2	3	594	673	6750	1	1500	1	900	400	500
66-70	2017-09-06	Ileus	154	40	16.8663	1	1	0	0	0	0	0	0	1	0		0	0	0	0	0	103	25.3	73.38	9.35	257	2017-09-07	5	1	0	0	0	0	0	0	0	0	0	2	3	235	303	4200	1	1000	1	100	100	NA
81-85	2017-09-05	Breast tumor	154	61	25.721	1	0	1	0	0	0	1	0	1	1	4	0	0	0	0	0	116	36.5	142.97	16.32		2017-09-11	11	0	1	0	0	0	0	0	0	0	0		3	91	135	1000	0		0	10	10	NA
56-80	2017-11-06	Biliary tumor	175	82	26.7755	0	1	0	0	1	0	0	0	1	0		0	0	0	0	0	152	46	84	4.03		2017-11-07	5	1	0	0	0	0	0	0	0	0	0	2	2	284	410	5500	1	1000	1	2100	1600	500
36-40	2017-10-24	Thyroid tumor	160	62	24.2188	0	0	0	0	0	0	0	0	1	0		0	0	0	0	0	102	45.5	51.88	2.63		2017-11-09	4+11	0	0	0	0	0	0	0	0	0	0		2	138	239	2200	1	500	0	350	100	250
51-55	2017-11-07	Biliary tumor	170	70	24.2215	0	0	0	0	0	0	0	0	1	0		0	0	1	0	0	164	48.5	77.1	3.4		2017-11-09	5	1	0	0	0	0	0	0	0	0	0	2	2	384	463	6400	1	1500	1	3000	1600	1400
61-65	2017-11-03	Duodenum tumor	162	63	24.0055	1	1	0	0	0	0	0	0	1	0		0	0	0	0	0	108	32.1	587.6	25.5	43	2017-11-09	5	1	0	0	0	0	0	0	0	0	0	2	3	255	352	3500	0		0	800	400	400
41-45	2017-11-06	Adrenal tumor	160	53	20.7031	1	0	0	0	0	0	0	0	1	0		0	0	0	0	0	134	48.4	55.4	7.28	12	2017-11-08	8	0	0	0	0	0	0	1	0	0	0	2	2	271	355	7182	1	2000	0	1500	1000	500
46-50	2017-11-07	Bladder tumor	170	69	23.8754	0	0	0	0	0	0	0	0	1	0		0	0	0	0	0	140	46	87.8	5.11	38	2017-11-09	8	0	0	0	0	0	0	1	0	0	0		3	19	58	500	0		0	10	10	NA
76-80	2017-11-06	Gastric tumor	167	65	23.3067	0	0	0	0	0	0	0	0	0	0		0	0	0	0	0	90	30.5	61.2	6.29	171	2017-11-10	5	1	0	0	0	0	0	0	0	0	0	2	2	275	363	3800	1	1000	1	500	100	400
61-65	2017-11-02	Renal stone	171	75	25.6489	1	0	0	0	0	0	1	0	0	0		0	0	1	0	0	134	33.9	116.9	9.27		2017-11-10	8	0	0	0	0	0	0	1	0	0	0		2	57	97	1800	1	500	0	10	10	NA
71-75	2017-11-06	Gastric tumor	150	60	26.6667	0	0	0	0	0	1	0	0	1	0		0	0	0	0	0	137	41.4	54.7	4.12	30	2017-11-10	5	1	0	0	0	0	0	0	0	0	0	1	3	253	360	3800	1	1000	0	250	50	200
61-65	2017-10-24	Gastric tumor	169	85	29.7609	0	1	0	0	0	0	0	0	1	0		0	0	0	0	0	149	38.5	62.23	4.27	105	2017-11-09	5	1	0	0	0	0	0	0	0	0	0	2	3	192	280	3250	1	1000	0	600	100	700
76-80	2017-11-10	Prostate tumor	165	51	18.7328	0	0	0	0	0	1	0	0	1	0		0	0	0	0	0	134	41.5	60.54	5.55	103	2017-11-13	5	1	0	0	0	0	0	0	0	0	0	1	3	103	187	2100	0		0	200	200	NA
71-75	2017-11-07	Bladder tumor	172	72	24.3375	1	0	0	0	0	0	1	1	1	0		0	0	0	0	0	41	23.3	1146	43.61	189	2017-11-07	8	0	0	0	0	0	0	1	0	0	1		4	153	232	3723	0		1	10	10	NA
46-50	2017-11-12	Spinal injury	160	75	29.2969	0	0	0	0	0	0	0	0	0	0		0	0	0	0	0	69	30.3	64.4	7.98		2017-11-14	3	0	0	1	0	0	0	0	0	0	0		3	315	432	5900	1	1000	1	1450	1000	450
81-85	2017-11-06	Colorectal tumor	154	66	27.8293	1	1	1	0	0	0	0	0	1	0		0	0	0	0	0	86	30	58.6	2.07	196	2017-11-13	5	1	0	0	0	0	0	0	0	0	0	1	3	459	525	4250	1	500	1	800	500	300
16-20	2017-11-13	Peritoneal tumor	175	67	21.8776	0	0	0	0	0	0	0	0	1	0		0	0	0	0	1	143	45.9	52.2	3.42		2017-11-15	5	1	0	0	0	0	0	0	0	0	0	2	1	457	548	12793	1	2000	1	5793	1000	3800
81-85	2017-11-09	Spinal osteoarthritis	180	92	28.3951	1	0	0	0	0	1	0	0	0	0		0	0	0	0	0	161	40.1	94.97	7.17	36	2017-11-15	3	0	0	1	0	0	0	0	0	0	0		3	194	289	1700	0		1	550	200	350
71-75	2017-11-14	Thyroid tumor	168	65	23.03	0	0	0	0	0	0	0	0	0	0		0	0	0	0	0	153	44	82.77	5.33		2017-11-16	11	0	1	0	0	0	0	0	0	0	0		3	43	100	500	0		0	10	10	NA
51-55	2017-11-15	Adrenal tumor	160	55	21.4844	1	0	0	0	0	0	0	0	0	0		0	0	0	0	0	121	42.9	61.34	4.5		2017-11-16	8	0	0	0	0	0	0	1	0	0	0	1	3	42	116	2100	1	500	0	360	10	350
76-80	2017-11-08	Colorectal tumor	163	62	23.3355	1	0	1	0	0	0	0	0	1	0		0	0	0	0	0	115	38.8	82.25	2.56		2017-11-16	5	1	0	0	0	0	0	0	0	0	0	1	3	161	248	1850	1	500	0	510	10	500
51-55	2017-11-04	head trauma	167	65	23.3067	0	0	0	0	0	0	0	0	0	0		0	0	0	0	0	100	32.4	130.7	10.39		2017-11-04	6	0	0	0	0	1	0	0	0	0	1		4	235	310	2950	1	1000	0	1150	500	650
71-75	2017-11-08	Ileus	170	84	29.0657	1	0	0	0	0	0	0	0	0	0		0	1	0	0	0	135	33.2	139.6	11.21	373	2017-11-17	5	1	0	0	0	0	0	0	0	0	0	2	2	79	171	1000	0		0	110	10	100
66-70	2017-10-30	Intestinal tumor	160	40	15.625	0	0	0	0	0	1	0	0	0	0		0	0	0	0	0	64	25.3	50.75	3.62		2017-11-16	5	1	0	0	0	0	0	0	0	0	0	2	2	165	237	1600	1	500	0	250	50	200
61-65	2017-11-07	Cerebral tumor	150	50	22.2222	0	0	0	0	0	0	0	0	1	0		0	0	0	0	0	139	40.7	59.5	3.81		2017-11-17	6	0	0	0	0	1	0	0	0	0	0		4	118	225	1825	1	500	0	1900	300	1600
46-50	2017-11-10	Pelvic tumor	162	60	22.8624	1	0	0	0	0	0	0	1	1	0		0	0	0	0	0	88	25.7	66.2	4.12		2017-11-17	7	0	0	0	0	0	1	0	0	0	0	2	2	530	618	11150	1	1500	1	5050	4000	1050
81-85	2017-11-23	Biliary stone	156	44.5	18.2857	1	0	1	1	0	1	0	0	0	0		0	0	0	0	0	136	33.5	69.8	3.32	364	2017-12-04	5	1	0	0	0	0	0	0	0	0	0	1	3						0	450	200	250
36-40	2017-12-04	Adrenal tumor	178	70	22.0932	1	0	0	0	0	0	0	0	0	0		0	0	1	0	0	150	48.2	90.7	5.64		2017-12-07	8	0	0	0	0	0	0	1	0	0	0	1	3	70	133	2300	1	1000	0	410	10	400
71-75	2017-11-29	Retroperitoneal tumor	172	55	18.5911	1	0	0	0	0	0	1	0	1	0		0	1	1	0	0	126	44.4	106	6.09		2017-12-06	8	0	0	0	0	0	0	1	0	0	0	2	2	336	415	7100	1	1000	1	1150	800	350
76-80	2017-12-05	Lung tumor	161	64	24.6904	1	0	1	0	0	0	1	0	1	0		0	0	1	0	0	122	35.9	102.58	9.01	148	2017-12-07	4	0	0	0	1	0	0	0	0	0	0	1	3	278	330	1100	0		0	500	200	300
76-80	2017-12-04	Pancreas tumor	155	54	22.4766	1	0	1	1	0	0	1	0	1	0		0	0	0	1	0	122	32.8	81.38	6.04	56	2017-12-08	5	1	0	0	0	0	0	0	0	0	0	2	3	197	331	2700	1	500	0	350	50	300
31-35	2017-12-05	Adrenal tumor	166	73	26.4915	1	0	0	0	0	0	0	0	1	0		0	0	0	0	0	149	47	76	3.81		2017-12-07	8	0	0	0	0	0	0	1	0	0	0	1	2	61	157	2600	1	500	0	160	10	150
71-75	2017-11-30	Duodenum tumor	160	60	23.4375	0	1	0	0	0	0	1	0	1	0		0	0	0	0	1	80	30.2	46.7	2.38	75	2017-12-07	5	1	0	0	0	0	0	0	0	0	0	2	3	319	523	2850	1	1000	0	700	200	500
81-85	2017-12-05	Colorectal tumor	175	80	26.1224	1	0	0	1	0	0	0	1	1	0		0	0	0	0	0	137	35.1	91.79	4.05		2017-12-08	5	1	0	0	0	0	0	0	0	0	0	1	3	159	243	2000	1	500	0	60	10	50
41-45	2017-12-08	Postoperative hemorrhage	154	71	29.9376	0	0	0	0	0	0	0	0	0	0		0	0	0	0	0	108	16.9	54.3	3.27		2017-12-08	7	0	0	0	0	0	1	0	0	0	1	1	4	158	270	12651	1	1500	1	9100	5600	3500
81-85	2017-12-05	Colorectal tumor	157	60	24.3418	0	0	0	0	0	0	0	0	1	0		0	0	0	0	0	69	28.5	51.7	5.98		2017-12-11	5	1	0	0	0	0	0	0	0	0	0	1	2	203	314	2350	0		0	450	100	350
56-60	2017-11-15	Ulcerative colitis	170	47	16.263	1	1	0	0	0	1	0	0	0	0		0	0	0	0	0	105	30.5	72.36	10.89	152	2017-11-17	5	1	0	0	0	0	0	0	0	0	0	2	4	488	592	8850	0		0	1750	600	1150
61-65	2017-12-06	Colorectal tumor	179	65	20.2865	0	0	0	0	0	0	0	0	1	1	3	0	1	0	0	1	61	33	115.98	9.31		2017-12-12	5	1	0	0	0	0	0	0	0	0	0	2	2	240	343	3450	0		1	850	300	550
81-85	2017-12-07	Colorectal tumor	150	55	24.4444	1	0	1	0	0	0	1	0	1	0		0	0	0	0	0	116	40.7	89.83	9.59	136	2017-12-11	5	1	0	0	0	0	0	0	0	0	0	1	2	118	218	2100	1	500	0	110	10	100
71-75	2017-12-10	Fracture	159	75	29.6665	1	0	1	0	0	0	0	1	0	0		0	0	0	1	0	123	35.7	93.5	6.52	243	2017-12-12	3	0	0	1	0	0	0	0	0	0	0		3	69	157	1500	0		0	450	100	350
61-65	2017-12-07	Gastric tumor	170	75	25.9516	0	0	0	0	0	0	1	0	1	0		0	0	0	0	0	131	42.6	98.45	4.77		2017-12-13	5	1	0	0	0	0	0	0	0	0	0	1	2	213	289	2350	1	500	0	550	200	350
71-75	2017-12-11	Cholecystitis	162	60	22.8624	1	0	0	0	0	0	0	0	0	0		0	0	0	0	0	151	46.8	89.98	7.11		2017-12-13	5	1	0	0	0	0	0	0	0	0	0	1	2	230	309	4100	1	1000	0	150	150	0
76-80	2017-12-12	Liver tumor	178	77	24.3025	1	1	0	0	0	0	1	0	1	0		0	0	0	0	0	140	39.2	72.6	6.57	29	2017-12-14	5	1	0	0	0	0	0	0	0	0	0	2	3	79	164	1500	1	500	0	500	100	400
66-70	2017-12-07	Gastric tumor	175	65	21.2245	0	0	1	0	0	0	1	0	1	0		0	0	0	0	1	156	42.5	80.45	7.55	43	2017-12-14	5	1	0	0	0	0	0	0	0	0	0	1	3	204	310	2350	1	500	0	400	50	350
61-65	2017-11-30	Retroperitoneal tumor	173	81	27.0641	1	0	0	0	0	0	0	0	1	0		0	1	0	0	0	137	40.6	118.4	6.79	21	2017-12-14	8	0	0	0	0	0	0	1	0	0	0	1	2	140	232	2850	0		0	2150	200	1950
81-85	2018-01-05	Arterial stenosis	168	74.5	26.396	1	0	0	0	0	1	0	1	0	0		0	0	0	1	0	148	46.3	122.08	8.9		2018-01-09	10	0	0	0	0	0	0	0	0	1	0		2	127	227	1100	0		0	650	200	450
61-65	2018-01-04	Adrenal tumor	172	77	26.0276	1	0	0	0	0	0	1	1	0	0		0	0	0	1	0	162	45.2	80.3	5.4		2018-01-08	8	0	0	0	0	0	0	1	0	0	0	1	3	43	159	2100	0		0	10	10	NA
71-75	2018-01-05	BPH	170	65	22.4913	0	1	0	0	0	0	1	0	0	0		0	0	0	0	0	136	40.6	60.4	3.28	10	2018-01-09	8	0	0	0	0	0	0	1	0	0	0		2	53	101	1100	0		0	10	10	NA
86-90	2018-01-04	Colorectal tumor	160	60	23.4375	1	1	1	0	0	0	0	0	1	0		0	0	0	0	1	84	28.5	61.7	5.68		2018-01-09	5	1	0	0	0	0	0	0	0	0	0	1	3	151	214	3850	0		0	550	100	450
76-80	2018-01-04	Gastric tumor	167	82	29.4023	1	1	1	1	0	0	1	1	1	0		0	0	0	0	0	149	38.5	109.73	6.18		2018-01-10	4	0	0	0	1	0	0	0	0	0	0	2	3	244	321	2600	1	500	0	700	500	200
41-45	2018-01-10	Mesenteric artery embolism	176	72	23.2438	1	1	0	0	0	0	0	0	0	0		0	0	0	0	0	151	44.8	63.9	4.21	14	2018-01-10	10	0	0	0	0	0	0	0	0	1	1	2	3	192	281	2100	1	500	0	220	50	170
51-55	2018-01-08	Ureter stone	170	98	33.91	1	1	1	0	0	0	1	0	0	0		0	0	0	0	0	150	44	90	5	49	2018-01-10	8	0	0	0	0	0	0	1	0	0	0		3	51	112	1100	0		0	10	10	NA
71-75	2017-12-25	Bladder tumor	170	80	27.6817	1	0	0	0	0	0	1	0	1	0		0	0	1	0	1	106	26.4	68.4	3.92	384	2018-01-10	8	0	0	0	0	0	0	1	0	0	0	2	3	179	266	2600	1	500	0	200	200	NA
66-70	2018-01-09	Colorectal tumor	170	69	23.8754	1	0	0	0	0	0	0	0	1	0		0	1	0	0	0	135	42.6	97.4	7.17	23	2018-01-11	5+8	0	0	0	0	0	0	0	0	0	0	2	2	319	428	2700	1	500	0	310	10	300
76-80	2018-01-05	Colorectal tumor	156	65	26.7094	1	1	1	0	0	0	1	0	1	0		0	0	0	0	0	105	30	80.6	5.26	83	2018-01-11	5	1	0	0	0	0	0	0	0	0	0	1	3	145	205	2050	0		0	320	20	300
76-80	2018-01-10	Breast tumor	163	70	26.3465	1	0	1	1	0	0	1	0	1	0		0	0	0	1	0	127	43.8	80.94	10.67		2018-01-12	11	0	1	0	0	0	0	0	0	0	0		3	64	102	500	0		0	110	10	100
51-55	2018-01-08	Retroperitoneal tumor	150	67	29.7778	1	0	0	0	0	0	0	0	0	0		0	0	0	0	0	131	48.7	69.5	4.32		2018-01-10	8	0	0	0	0	0	0	1	0	0	0	2	3	327	404	5618	1	3000	0	4850	1250	2600
66-70	2018-01-03	Esophageal tumor	175	63	20.5714	0	0	0	0	0	0	0	0	1	0		0	0	0	0	0	143	34.6	83.61	8.32	470	2018-01-12	4	0	0	0	1	0	0	0	0	0	0	2	3	280	364	4100	1	1000	0	1050	300	750
91-95	2017-12-29	Bladder tumor	168	50	17.7154	0	0	0	0	0	0	0	0	1	1	4	0	0	0	0	0	104	29.1	916	41.96	140	2018-01-11	8	0	0	0	0	0	0	1	0	0	0	2	3	156	202	2950	1	1000	0	10	10	NA
76-80	2018-01-12	Prostate tumor	165	63	23.1405	1	0	0	1	1	0	0	0	1	0		0	1	0	0	0	135	44.9	128.9	7.8		2018-01-15	8	0	0	0	0	0	0	1	0	0	0		2	75	134	1500	0		0	400	400	NA
81-85	2018-01-03	Colorectal tumor	160	65	25.3906	0	0	0	0	0	1	0	0	1	0		0	0	1	0	0	88	34.7	64.5	6.29		2018-01-12	5	1	0	0	0	0	0	0	0	0	0	1	2	206	303	3050	1	500	0	1200	100	1100
71-75	2018-01-03	Bladder tumor	170	60	20.7612	0	0	0	0	0	1	0	0	1	0		0	0	1	0	0	124	39	128.92	8.48		2018-01-15	8	0	0	0	0	0	0	1	0	0	0	2	2	234	305	3800	1	1000	0	500	300	200
51-55	2018-01-09	Pelvic abscess	155	74	30.8012	0	0	0	0	0	0	0	0	1	0		0	0	0	0	0	69	21.3	104.2	4.45		2018-01-11	7	0	0	0	0	0	1	0	0	0	0	1	3	39	126	2000	1	500	0	370	20	350
61-65	2018-01-08	Pancreas tumor	172	87.5	29.5768	1	0	0	0	0	0	0	0	0	0		0	0	1	1	1	143	41.2	87.62	5.98		2018-01-16	5	1	0	0	0	0	0	0	0	0	0	1	2	274	246	3350	1	1000	0	500	100	400
46-50	2018-01-15	Adrenal tumor	165	61	22.4059	1	0	1	0	0	0	0	0	0	0		0	0	0	0	0	135	46.2	66.39	4.32		2018-01-16	8	0	0	0	0	0	0	1	0	0	0	1	3	29	82	1100	0		0	10	10	NA
66-70	2017-11-30	Spinal tumor	158	65	26.0375	0	0	0	0	0	1	0	0	1	0		0	0	0	0	0	132	35.4	65.3	7.25	282	2018-01-16	6	0	0	0	0	1	0	0	0	0	0		3	182	284	2100	1	500	0	930	100	830
26-30	2018-01-09	Pregnancy with SLE	160	60.5	23.6328	0	0	0	0	0	0	0	0	0	0		0	0	0	1	0	67	23.3	56.5	6.95	94	2018-01-15	7	0	0	0	0	0	1	0	0	0	0	2	3	45	97	500	0		0	300	250	50
66-70	2018-01-04	Colorectal tumor	175	70	22.8571	1	1	1	0	0	0	0	0	1	0		0	0	0	0	0	78	34.1	50	5.56	1022	2018-01-15	5	1	0	0	0	0	0	0	0	0	0	1	3	130	206	2700	1	500	0	1350	50	1300
81-85	2017-12-14	Acute cholangitis	154	69	29.0943	1	1	0	0	0	1	1	0	1	0		0	0	0	1	0	123	35.9	76	4.84	46	2018-01-11	5	1	0	0	0	0	0	0	0	0	0	1	3	278	367	2000	0		0	450	100	350
81-85	2018-01-16	Bladder tumor	175	68	22.2041	0	1	0	0	0	0	0	0	1	0		0	0	0	0	0	140	44	93.55	7.77		2018-01-17	8	0	0	0	0	0	0	1	0	0	0		2	18	68	1000	0		0	10	10	NA
61-65	2017-12-29	Colorectal tumor	171	69	23.597	0	0	0	0	0	0	0	1	1	1	2	0	1	0	0	0	62	38.9	125.6	6.76	620	2018-01-18	5	1	0	0	0	0	0	0	0	0	0	1	3	367	496	4000	1	1000	0	1450	500	950
51-55	2018-01-04	Lung tumor	165	52	19.1001	0	0	0	0	0	1	0	0	1	0		0	0	1	0	0	98	43.6	62.26	7.43	25	2018-01-08	4	0	0	0	1	0	0	0	0	0	0	2	2	239	327	5200	1	1000	1	1400	200	1200
81-85	2018-01-17	Bladder tumor	157	55	22.3133	0	0	0	0	0	0	0	0	1	0		0	0	0	0	0	125	40	64.5	5.47	406	2018-01-19	8	0	0	0	0	0	0	1	0	0	0	1	3	288	388	2100	1	500	0	300	100	200
46-50	2018-01-21	SAH	160	65	25.3906	1	0	0	0	0	0	0	0	0	0		0	0	0	0	0	100	50.2	61.2	4.12		2018-01-21	6	0	0	0	0	1	0	0	0	0	1		4	180	220	500	0		0	10	10	NA
86-90	2018-01-20	Fracture	158	50	20.0288	1	1	0	0	0	0	1	0	0	0		0	0	0	1	0	113	38.2	72.8	6.85	127	2018-01-22	3	0	0	1	0	0	0	0	0	0	0		3	73	165	700	0		0	10	10	NA
76-80	2018-01-17	Colorectal tumor	158	60	24.0346	1	1	1	0	0	0	0	1	1	0		0	0	0	0	0	136	45.4	64.15	4.55	47	2018-01-22	5	1	0	0	0	0	0	0	0	0	0	1	3	109	220	2100	1	500	0	900	50	850
76-80	2018-01-19	Prostate tumor	172	75	25.3515	1	0	0	0	0	0	0	0	1	0		0	0	0	0	0	133	41	91.95	7.88		2018-01-22	8	0	0	0	0	0	0	1	0	0	0	1	2	139	207	1000	0		0	10	10	NA
76-80	2018-01-22	Bladder tumor	164	64.5	23.9813	1	1	1	0	0	0	1	0	1	0		0	0	0	0	0	123	43.1	76.19	7.2		2018-01-23	8	0	0	0	0	0	0	1	0	0	0		3	20	78	1000	0		0	10	10	NA
71-75	2018-01-19	Bladder tumor	162	65	24.7676	1	0	0	0	0	0	0	0	1	0		0	0	1	0	0	141	45.4	74.9	4.21	65	2018-01-23	8	0	0	0	0	0	0	1	0	0	0	2	2	240	294	5227	1	500	0	1600	1000	600
81-85	2018-01-17	Colorectal tumor	164	55	20.4491	0	0	1	1	0	0	0	0	1	0		0	0	0	0	0	103	37.1	115.54	6.29	242	2018-01-20	5	1	0	0	0	0	0	0	0	0	0	1	4	139	245	1600	0		0	150	50	100
81-85	2018-01-22	Breast tumor	156	45	18.4911	1	0	0	0	0	0	0	0	1	0		0	0	0	0	0	148	43.7	56.26	7.27		2018-01-23	11	0	1	0	0	0	0	0	0	0	0		2	61	132	500	0		0	10	10	NA
16-20	2018-01-22	Retroperitoneal tumor	180	71	21.9136	1	0	0	0	0	0	0	0	0	0		0	0	0	0	0	140	44.5	78.21	5.9		2018-01-24	8+5	0	0	0	0	0	0	0	0	0	0	2	3	193	287	2100	1	500	0	300	100	200
81-85	2018-01-22	Bladder tumor	178	75	23.6713	1	0	0	0	0	0	0	0	1	0		0	0	0	1	0	119	40.1	105.82	6.2	151	2018-01-24	8	0	0	0	0	0	0	1	0	0	0		2	39	117	1000	0		0	10	10	NA
86-90	2018-01-22	Bladder tumor	162	63	24.0055	0	0	0	1	0	0	1	1	1	0		0	0	1	0	0	123	40.8	157.68	12.1	89	2018-01-24	8	0	0	0	0	0	0	1	0	0	0		3	23	83	1000	1	500	0	10	10	NA
51-55	2018-01-10	Pancreas tumor	164	60	22.3081	0	1	0	0	0	0	0	0	1	0		0	0	0	0	1	135	44.2	60.3	4.75	59	2018-01-17	5+10	0	0	0	0	0	0	0	0	0	0	2	2	840	960	9250	1	2000	0	4150	700	3450
51-55	2018-01-24	Adrenal tumor	175	60	19.5918	1	0	0	0	0	0	0	0	1	0		0	0	0	0	0	133	45.2	74.38	4.01	39	2018-01-25	8	0	0	0	0	0	0	1	0	0	0	1	3	97	162	4100	0		0	210	10	200
56-60	2018-01-22	Bladder tumor	158	68	27.2392	0	0	0	0	0	0	0	0	1	0		0	0	0	0	0	119	46.4	60.4	8.14		2018-01-24	8	0	0	0	0	0	0	1	0	0	0	1	2	312	386	8150	1	1000	1	2800	2300	500
86-90	2018-01-06	Colorectal tumor	160	46	17.9688	1	1	1	0	0	0	0	0	1	0		0	0	0	0	0	97	37.5	71.6	6.15	1362	2018-01-17	5	1	0	0	0	0	0	0	0	0	0	1	4	148	220	1850	1	100	0	260	10	250
51-55	2018-03-07	Adrenal tumor	170	65	22.4913	0	1	0	0	0	0	0	0	0	0		0	0	0	0	0	124	32.9	60.9	7.36	128	2018-03-08	8	0	0	0	0	0	0	1	0	0	0	1	2	73	132	2200	1	500	0	350	100	250
26-30	2018-03-05	Pregnancy with preeclampsia	158	79.5	31.8459	1	0	0	0	0	0	0	0	0	0		0	0	0	0	0	115	28.5	61.2	5.72		2018-03-09	7	0	0	0	0	0	1	0	0	0	0	2	3	49	87	500	0		0	300	50	250
61-65	2018-03-07	MG	156	85	34.9277	1	0	0	0	0	0	0	0	1	0		0	0	0	0	0	131	35.9	74.3	5.55		2018-03-12	4	0	0	0	1	0	0	0	0	0	0	1	2	274	368	2100	1	500	0	400	100	300
61-65	2018-03-06	Retroperitoneal tumor	160	65	25.3906	1	1	0	0	0	0	0	0	1	0		0	1	0	0	0	144	44.5	80.37	6.77		2018-03-09	8	0	0	0	0	0	0	1	0	0	0	2	2	432	528	9378	1	2000	1	3000	2300	700
31-35	2018-03-02	Hip dearticulation	150	48	21.3333	0	0	0	0	0	0	0	0	0	0		0	0	0	0	0	123	43.2	29	3.39		2018-03-12	3	0	0	1	0	0	0	0	0	0	0		2	532	714	12850	1	2000	1	5750	4500	1250
56-60	2018-02-23	Intraabdominal abscess	164	65	24.1672	0	0	0	0	0	0	0	0	0	0		0	0	0	0	1	128	37.5	54.92	4.72		2018-02-23	5	1	0	0	0	0	0	0	0	0	1	2	3	282	343	4750	0		0	170	150	20
76-80	2018-03-09	Bladder tumor	153	55	23.4952	1	1	1	0	0	0	0	0	1	0		0	1	0	0	0	79	33	89.4	4.16	97	2018-03-13	8	0	0	0	0	0	0	1	0	0	0	2	3	180	274	2800	0		1	10	10	NA
66-70	2018-02-26	Retroperitoneal tumor	164	80	29.7442	1	1	0	0	0	0	0	0	1	0		0	0	0	0	0	128	40.7	103.8	6.43		2018-03-08	8	0	0	0	0	0	0	1	0	0	0	2	3	765	902	15500	1	2000	1	5500	3600	1900
71-75	2018-03-05	Esophageal tumor	165	78.5	28.8338	0	1	0	0	0	0	1	1	1	0		0	0	0	0	0	104	36.8	95.93	7.97	216	2018-03-13	4	0	0	0	1	0	0	0	0	0	0	1	3	484	594	5100	0		0	850	300	550
31-35	2018-03-12	Retroperitoneal tumor	162	71.5	27.2443	1	0	0	0	0	0	0	0	0	0		0	0	0	0	0	129	42.6	56.02	4.49		2018-03-14	8	0	0	0	0	0	0	1	0	0	0	2	3	265	328	5350	1	1500	0	1600	500	1100
56-60	2018-03-12	Urethra tumor	168	76	26.9274	1	0	1	0	0	0	0	0	1	0		0	0	1	1	0	143	47.5	97.7	6.08		2018-03-14	8	0	0	0	0	0	0	1	0	0	0	2	3	85	166	1000	0		0	230	30	200
66-70	2018-03-09	Breast tumor	158	59	23.634	1	0	1	0	0	0	0	0	1	0		0	0	0	0	0	132	45	69.96	4.5		2018-03-15	11	0	1	0	0	0	0	0	0	0	0		3	89	133	1000	0		0	1100	10	1000
71-75	2018-03-12	Spinal osteoarthritis	173	70	23.3887	1	0	0	0	0	1	0	0	0	0		0	0	1	1	0	143	40.9	79.4	6.36	135	2018-03-16	3	0	0	1	0	0	0	0	0	0	0		3	135	216	1500	0		0	1000	400	600
81-85	2018-03-12	Biliary stone	150	60	26.6667	1	0	1	0	0	0	0	0	0	0		0	0	0	0	0	145	43.3	62.62	4.08	76	2018-03-16	5	1	0	0	0	0	0	0	0	0	0	1	2	47	118	1100	0		0	210	10	200
66-70	2018-03-14	Bladder tumor	178	67	21.1463	1	0	1	0	0	0	0	1	1	0		0	0	1	0	0	127	41.8	102.12	7.27	280	2018-03-16	8	0	0	0	0	0	0	1	0	0	0		3	17	114	500	0		0	10	10	NA
86-90	2018-03-08	Colorectal tumor	150	50	22.2222	0	0	0	0	0	0	1	1	1	0		0	0	0	0	0	117	40.2	93.8	4.97		2018-03-15	5	1	0	0	0	0	0	0	0	0	0	2	3	193	329	1500	0		0	350	100	250
86-90	2018-03-05	Colorectal tumor	162	50	19.052	1	0	0	0	0	0	1	0	1	0		0	0	0	0	0	99	28.3	55.9	2.65	68	2018-03-14	5	1	0	0	0	0	0	0	0	0	0	1	3	195	309	2600	1	500	0	450	100	350
61-65	2018-03-12	Colorectal tumor	167	68.5	24.5617	1	0	0	0	0	0	0	0	1	0		0	0	1	0	0	120	40.5	69.22	3.81	173	2018-03-16	5	1	0	0	0	0	0	0	0	0	0	1	3	70	139	3100	1	500	0	560	10	550
56-60	2018-03-16	Bladder tumor	176	85	27.4406	0	0	0	0	0	0	0	0	1	0		0	0	0	0	0	120	44.7	82.6	5.57		2018-03-19	8	0	0	0	0	0	0	1	0	0	0	1	2	236	364	4000	1	500	0	10	10	NA
81-85	2018-03-09	Pancreas tumor	167	60	21.5139	1	0	1	0	0	0	0	0	1	0		0	0	0	0	0	106	27.8	79.1	4.12	100	2018-03-19	5	1	0	0	0	0	0	0	0	0	0	2	3	103	205	2600	1	500	0	200	50	150
61-65	2018-03-13	Gastric tumor	170	76	26.2976	1	0	0	0	0	0	0	1	1	0		0	0	0	0	0	156	42.3	83.19	5.4	43	2018-03-19	5	1	0	0	0	0	0	0	0	0	0	2	2	235	337	2600	1	500	0	600	300	300
61-65	2018-03-07	Arterial stenosis	175	77	25.1429	1	1	1	0	0	0	1	1	0	0		0	0	0	0	0	167	41.4	78.8	3.4	167	2018-03-19	10	0	0	0	0	0	0	0	0	1	0		3	177	225	1600	0		0	830	30	800
31-35	2018-03-12	Hernia	173	68	22.7204	0	0	0	0	0	0	0	0	0	0		0	0	0	0	0	109	32.5	65.6	3.58		2018-03-13	5	1	0	0	0	0	0	0	0	0	1	1	4	188	277	4500	1	1000	0	50	130	180
51-55	2018-03-19	Bladder tumor	170	72	24.9135	1	0	1	0	0	0	1	0	1	0		0	0	0	0	0	143	44.8	73.37	5.17		2018-03-20	8	0	0	0	0	0	0	1	0	0	0		2	24	76	1000	0		0	10	10	NA
56-60	2018-03-06	Lung tumor	174	74	24.4418	0	0	0	0	0	0	0	0	1	0		0	0	0	0	0	153	38.6	61	4.42		2018-03-20	4	0	0	0	1	0	0	0	0	0	0	1	3	228	338	2600	1	500	0	1200	300	900
71-75	2018-03-19	Bladder tumor	176	75	24.2123	1	1	1	0	0	0	1	0	1	0		0	0	0	0	0	150	45.6	99.07	9		2018-03-20	8	0	0	0	0	0	0	1	0	0	0		3	39	79	500	0		0	10	10	NA
61-65	2018-03-14	Colorectal tumor	164	59	21.9363	0	0	0	0	0	0	0	0	1	0		0	0	0	0	0	132	45.4	60.74	4.73		2018-03-19	5	1	0	0	0	0	0	0	0	0	0	1	2	150	225	1800	0		0	1050	200	850
76-80	2018-03-19	Bladder tumor	170	65	22.4913	0	0	0	0	0	0	0	0	1	0		0	0	0	0	0	127	41.2	70.6	5.09		2018-03-21	8	0	0	0	0	0	0	1	0	0	0		3	10	41	500	0		0	510	10	500
61-65	2018-03-19	Retroperitoneal tumor	175	76	24.8163	0	0	0	0	0	0	0	0	0	0		0	1	1	0	1	149	46	132.67	6.61		2018-03-21	8	0	0	0	0	0	0	1	0	0	0	2	3	308	378	8757	1	2500	0	3200	2300	900
81-85	2018-03-16	Breast tumor	160	65	25.3906	1	0	1	0	0	0	0	0	1	0		0	0	0	1	1	131	42.3	78.84	6.16		2018-03-21	11	0	1	0	0	0	0	0	0	0	0		3	55	107	500	0		0	10	10	NA
46-50	2018-03-19	Adrenal tumor	160	57	22.2656	1	0	0	0	0	0	0	0	0	0		0	0	0	0	0	168	49.5	67.3	2.93		2018-03-21	8	0	0	0	0	0	0	1	0	0	0	1	3	57	190	2300	1	1000	0	1220	820	400
76-80	2018-03-14	Biliary tumor	156	54	22.1893	0	0	0	0	0	0	0	0	1	0		0	0	0	0	0	113	40.6	62.8	4.67	74	2018-03-22	5	1	0	0	0	0	0	0	0	0	0	2	2	260	338	4100	1	500	0	1300	300	1000
76-80	2018-03-20	Thyroid tumor	160	65	25.3906	1	1	0	0	0	0	1	0	0	0		0	0	1	0	0	145	37.9	63.88	5.65		2018-03-22	11	0	1	0	0	0	0	0	0	0	0		3	28	80	500	0		0	10	10	NA
86-90	2018-03-12	Colorectal tumor	150	41	18.2222	1	0	0	0	0	0	1	0	1	0		0	0	0	0	0	78	30.7	56.2	3.77		2018-03-22	5	1	0	0	0	0	0	0	0	0	0	2	3	133	218	1600	0		0	350	50	300
71-75	2018-03-08	Colorectal tumor	178	88	27.7743	1	1	0	0	0	0	0	0	1	0		0	0	0	0	0	143	36.6	88.5	5.93		2018-03-23	5	1	0	0	0	0	0	0	0	0	0	1	3	296	413	2500	1	1000	0	1400	500	900
76-80	2018-03-12	Colorectal tumor	168	45	15.9439	1	0	0	0	0	1	0	0	1	0		0	0	1	0	0	76	30.7	61.96	5.29		2018-03-21	5	1	0	0	0	0	0	0	0	0	0	2	3	321	513	5100	1	1000	0	1300	1100	200
61-65	2018-03-21	Adrenal tumor	163	47	17.6898	0	1	0	0	0	0	0	0	0	0		0	0	0	0	0	135	48.3	56.16	6.99	78	2018-03-23	8	0	0	0	0	0	0	1	0	0	0	1	2	70	110	2100	1	500	0	1450	50	1400
51-55	2018-03-22	Spinalcompression	170	85	29.4118	0	0	0	0	0	0	0	0	1	0		0	0	0	0	0	102	26.4	91	8.17		2018-03-23	3	0	0	1	0	0	0	0	0	0	0		3	274	502	4300	1	500	1	2400	2000	400
81-85	2018-03-22	Colorectal tumor	160	50	19.5312	1	0	0	0	0	0	1	0	1	0		0	0	0	0	0	95	33.5	68.9	4.97	195	2018-03-23	5	1	0	0	0	0	0	0	0	0	0	1	3	193	262	2300	1	500	0	300	100	200
66-70	2018-03-21	Femoraltumor	176	68	21.9525	1	0	1	0	0	0	0	0	1	0		0	1	0	0	0	89	35.3	92.5	10		2018-03-26	3	0	0	1	0	0	0	0	0	0	0		3	243	352	4350	1	500	1	2150	800	1350
26-30	2018-03-25	Arterial embolism	160	60	23.4375	0	0	0	0	0	0	0	1	0	0		0	0	0	0	0	123	36.8	49.6	2.45	18	2018-03-25	33	0	0	0	0	0	0	0	0	0	1		3	126	200	2000	0		0	330	80	250
61-65	2018-03-19	Meningioma	168	62.5	22.1443	1	0	0	0	0	0	0	0	1	0		0	0	0	0	1	112	39.7	79.48	4.87		2018-03-26	34	0	0	0	0	0	0	0	0	0	0		3	414	512	5050	1	1500	0	2450	350	2100
36-40	2018-03-12	Fracture	165	65	23.8751	0	0	0	0	0	0	0	0	0	0		0	0	1	0	0	132	35.5	105.47	6.44	33	2018-03-27	3	0	0	1	0	0	0	0	0	0	0		3	217	330	1800	0		1	500	200	300
66-70	2018-03-24	Gas gangrene	176	88	28.4091	1	1	0	0	0	0	1	0	0	0		0	0	1	0	0	122	25.9	174.4	10.35	464	2018-03-27	8	0	0	0	0	0	0	1	0	0	0		2	115	272	1500	0		0	370	20	350
51-55	2018-04-04	Adrenal tumor	162	64	24.3865	1	0	0	0	0	0	0	0	0	0		0	0	0	0	0	130	44.7	75.87	4.23		2018-04-09	8	0	0	0	0	0	0	1	0	0	0	1	3	99	173	2000	1	500	0	600	50	550
61-65	2018-03-27	Colorectal tumor	182	69	20.8308	0	0	0	0	0	0	0	0	0	0		0	0	0	0	0	93	38.6	79.6	7.09	209	2018-04-09	5	1	0	0	0	0	0	0	0	0	0	1	2	223	338	2800	1	500	0	450	150	300
66-70	2018-03-09	Soft tissue infection	159	80	31.6443	1	1	0	0	0	0	0	0	0	0		0	0	0	0	0	139	34.2	42.84	8.5		2018-04-10	3	0	0	1	0	0	0	0	0	0	0		3	154	232	1500	0		0	10	10	NA
71-75	2018-04-03	Cecal tumor	162	62.5	23.815	0	0	0	0	0	0	0	0	1	0		0	0	0	0	0	131	40.2	73.02	5.64	118	2018-04-10	5	1	0	0	0	0	0	0	0	0	0	2	3	167	256	2600	1	500	0	550	100	450
51-55	2018-04-08	Arterial aneurysm	165	71	26.079	1	0	0	0	0	0	0	0	0	0		0	1	1	0	0	143	42.3	67.7	4.46	8	2018-04-12	10	0	0	0	0	0	0	0	0	1	0	2	3	278	371	6507	1	1000	0	2400	1500	900
86-90	2018-04-08	Ileus	165	65	23.8751	1	1	0	0	0	0	0	0	0	0		0	0	0	0	0	141	37.3	142	23.3	397	2018-04-08	5	1	0	0	0	0	0	0	0	0	1	2	4	216	303	2200	0		0	500	50	450
76-80	2018-04-08	Endometrial tumor	156	73	29.9967	1	1	1	0	0	0	0	0	1	0		0	0	0	0	0	149	26.4	82.4	6.36		2018-04-11	7	0	0	0	0	0	1	0	0	0	0	2	3	85	160	1500	0		0	40	10	30
71-75	2018-04-10	Vulva tumor	157	59	23.9361	1	1	1	0	0	0	1	0	1	0		0	0	0	0	0	118	38.4	60.2	6.85		2018-04-12	3	0	0	1	0	0	0	0	0	0	0		3	223	321	1500	0		0	700	300	400
86-90	2018-04-11	Obstructive jaundice	165	58	21.3039	1	0	0	0	0	0	1	0	1	0		0	0	0	1	0	141	35.3	68	5		2018-04-11	5	1	0	0	0	0	0	0	0	0	1		3	40	50	500	0		0	0	0	NA
66-70	2018-04-11	Prostate tumor	180	100	30.8642	0	0	1	0	0	0	1	0	1	0		0	0	0	0	0	132	40.2	103.8	6.78		2018-04-13	8	0	0	0	0	0	0	1	0	0	0	1	3	142	225	2600	1	250	0	200	200	NA
61-65	2018-04-11	Colorectal tumor	163	50	18.8189	1	0	0	0	0	1	0	0	1	0		0	0	0	0	0	118	41.7	66.17	5.44	29	2018-04-13	5	1	0	0	0	0	0	0	0	0	0	1	2	129	235	2000	0		0	10	10	NA
86-90	2018-04-13	Ileus	158	40	16.0231	0	0	0	0	0	0	0	0	0	0		0	0	0	0	0	97	18.8	59.21	5.67	563	2018-04-13	5	1	0	0	0	0	0	0	0	0	1	2	3	82	220	1500	1	500	0	210	10	200
51-55	2018-04-08	Lung tumor	165	56.5	20.753	0	0	0	0	0	0	0	0	1	0		0	0	0	0	0	131	34	65.06	4.72		2018-04-16	4	0	0	0	1	0	0	0	0	0	0	1	3	180	267	1100	0		0	450	100	350
41-45	2018-04-13	Ureter stone	180	89	27.4691	0	0	1	0	0	0	0	0	0	0		0	0	0	0	0	145	47.4	95.1	5.83	73	2018-04-16	8	0	0	0	0	0	0	1	0	0	0		3	58	104	1100	0		0	10	10	NA
86-90	2018-04-16	Colorectal tumor	165	54	19.8347	0	0	0	0	0	0	0	0	1	0		0	0	0	0	0	104	36.7	88.77	10.38		2018-04-14	5	1	0	0	0	0	0	0	0	0	0	2	2	194	280	2100	1	500	0	600	100	500
71-75	2018-04-03	Gastric tumor	163	51	19.1953	1	0	1	0	0	0	0	0	1	0		0	0	1	0	0	155	44.7	93.8	6.54	166	2018-04-11	5	1	0	0	0	0	0	0	0	0	0	2	3	229	308	4100	1	500	0	1150	200	950
76-80	2018-04-16	Adrenal tumor	150	48	21.3333	0	0	0	0	0	0	0	0	1	0		0	1	0	0	0	140	44.1	77.81	7.6	49	2018-04-17	8	0	0	0	0	0	0	1	0	0	0	1	2	68	123	1000	0		0	110	10	100
76-80	2018-04-03	Colorectal tumor	163	49	18.4425	0	0	0	0	0	1	1	0	1	0		0	0	1	0	0	150	41.1	75	5.29		2018-04-18	5	1	0	0	0	0	0	0	0	0	0	1	3	171	278	2350	1	500	0	460	10	450
76-80	2018-04-11	Bladder tumor	183	100	29.8606	0	0	1	0	0	0	0	0	1	0		0	0	0	0	0	104	37	135.9	5.88	214	2018-04-18	8	0	0	0	0	0	0	1	0	0	0	1	3	197	277	1500	0		0	300	200	100
66-70	2018-03-26	Gastric tumor	170	53	18.3391	0	1	0	0	1	0	0	0	1	0		0	0	1	0	0	80	25.7	70.1	3.96		2018-04-18	5	1	0	0	0	0	0	0	0	0	0	2	2	341	446	4100	1	500	1	600	500	1100
76-80	2018-04-12	Colorectal tumor	150	54	24	1	0	1	0	0	0	0	0	1	0		0	0	0	0	0	121	39	72.91	3.65	64	2018-04-19	5	1	0	0	0	0	0	0	0	0	0	1	3	247	337	1800	0		0	510	10	500
61-65	2018-03-02	Colorectal tumor	150	50	22.2222	1	1	0	0	0	0	0	0	1	0		0	0	0	0	0	101	18.9	144.12	6.96		2018-03-02	5	1	0	0	0	0	0	0	0	0	1	2	3	357	467	4575	1	500	0	700	200	500
56-60	2018-04-17	Ureter stone	167	82	29.4023	0	1	1	0	0	0	1	0	0	0		0	0	0	0	0	152	40.4	84.4	6.83	22	2018-04-20	8	0	0	0	0	0	0	1	0	0	0		3	55	137	1100	0		0	10	10	NA
81-85	2018-04-09	Colorectal tumor	170	45	15.5709	0	0	0	0	0	0	0	0	1	0		0	0	1	0	1	140	33.3	76	7.8		2018-04-10	5	1	0	0	0	0	0	0	0	0	1	2	3	223	330	2100	1	1000	0	350	100	250
46-50	2018-04-18	Renal stone	165	66.5	24.4261	0	0	0	0	0	0	0	0	0	0		0	0	0	0	0	142	43.2	103.9	6.78		2018-04-24	8	0	0	0	0	0	0	1	0	0	0	1	2	172	236	2100	0		0	10	10	NA
36-40	2018-04-18	Morbid oberity	164	162	60.232	1	0	0	0	0	0	0	0	0	0		0	0	1	0	0	132	38.8	69.34	5.91	24	2018-04-20	5	1	0	0	0	0	0	0	0	0	0	1	3	187	277	2100	1	500	0	310	10	300
71-75	2018-04-17	Cecal tumor	162	60	22.8624	1	0	0	0	0	0	0	0	1	0		0	0	0	0	0	121	47.7	87	5.05		2018-04-24	5	1	0	0	0	0	0	0	0	0	0	1	2	131	235	2100	1	1000	0	10	10	NA
81-85	2018-04-23	Colorectal tumor	180	75	23.1481	0	1	0	0	0	0	0	0	1	0		0	0	0	0	0	100	32.4	83.32	5.51	91	2018-04-25	5	1	0	0	0	0	0	0	0	0	0	2	3	133	228	2300	0		0	800	100	700
61-65	2018-04-23	Lung tumor	175	59	19.2653	0	0	0	0	0	0	0	0	1	0		0	0	1	0	0	131	37.5	64.9	5.74		2018-04-25	4	0	0	0	1	0	0	0	0	0	0	1	2	466	562	3300	1	1000	0	1100	500	600
76-80	2018-04-24	Thyroid tumor	156	65	26.7094	1	1	0	0	0	0	0	0	1	0		0	0	0	0	0	133	45	81.4	6.14		2018-04-26	11	0	1	0	0	0	0	0	0	0	0		3	49	89	500	0		0	10	10	NA
61-65	2018-03-22	Esophageal tumor	154	40	16.8663	1	0	0	0	0	0	0	0	1	0		0	0	1	0	0	110	36.8	77.5	2.99		2018-04-26	4	0	0	0	1	0	0	0	0	0	0	2	2	558	641	4700	1	1000	0	1250	100	1150
61-65	2018-03-26	Duodenum perforation	158	70	28.0404	1	0	0	0	0	0	0	0	0	0		0	0	0	0	0	98	25.3	115.9	13.13	31	2018-03-26	5	1	0	0	0	0	0	0	0	0	1	2	4	193	332	5000	1	500	1	310	10	300
56-60	2018-04-26	Adrenal tumor	166	73.5	26.673	0	0	0	0	0	0	0	0	0	0		0	0	0	0	0	123	43.2	98.28	3.75		2018-04-27	8	0	0	0	0	0	0	1	0	0	0	1	3	158	214	3600	1	500	1	1050	700	350
71-75	2018-05-28	Arterial stenosis	168	78	27.6361	0	0	1	0	0	0	0	0	0	0		0	0	0	0	1	149	38.8	82.32	5.41	85	2018-06-04	10	0	0	0	0	0	0	0	0	1	0		3	218	341	2200	0		0	1350	100	1250
81-85	2018-05-24	Appendix tumor	168	61.5	21.79	1	1	0	0	0	1	0	0	1	0		0	0	0	0	0	149	43.7	71	7.98		2018-06-04	5	1	0	0	0	0	0	0	0	0	0	2	3	116	182	2100	0		0	310	10	300
66-70	2018-05-16	Colorectal tumor	170	41	14.1869	0	0	0	0	0	1	0	0	1	0		0	0	1	0	0	97	36.3	60	6.98		2018-06-05	5	1	0	0	0	0	0	0	0	0	0	2	3	303	377	3600	1	1000	0	360	10	350
81-85	2018-06-01	Colorectal tumor	151	42	18.4202	0	0	0	0	0	0	0	0	1	0		0	0	0	0	0	107	37.3	63.9	6.65		2018-06-05	5	1	0	0	0	0	0	0	0	0	0	2	2	88	180	2100	1	500	0	210	10	200
66-70	2018-06-01	Bladder tumor	170	79.5	27.5087	1	0	0	0	0	0	0	0	1	0		0	0	0	0	0	127	42.5	120.81	8.19	50	2018-06-05	8	0	0	0	0	0	0	1	0	0	0	1	2	320	393	2600	1	500	0	200	200	NA
66-70	2018-05-24	Colorectal tumor	172	65	21.9713	1	1	1	0	0	0	0	0	1	0		0	0	0	0	0	115	30.6	110.3	5.5	165	2018-06-06	5	1	0	0	0	0	0	0	0	0	0	2	3	125	220	2600	1	500	0	250	50	200
71-75	2018-06-04	Ureteral tumor	176	82	26.4721	1	1	1	0	0	0	0	0	1	0		0	0	0	0	0	144	47.6	104.1	5.49		2018-06-06	8	0	0	0	0	0	0	1	0	0	0	1	3	92	149	1100	0		0	10	10	NA
61-65	2018-06-05	Bladder tumor	155	59	24.5578	1	0	0	0	0	0	0	0	1	0		0	0	0	0	0	136	45.6	74.3	5.06		2018-06-06	8	0	0	0	0	0	0	1	0	0	0		2	42	122	2000	0		0	10	10	NA
76-80	2018-05-14	Colorectal tumor	148	60	27.3923	0	0	0	0	0	0	0	0	0	0		0	0	1	0	0	109	42.2	73.1	4.02		2018-06-06	5	1	0	0	0	0	0	0	0	0	0	1	3	172	319	3300	1	500	0	350	50	300
96-100	2018-06-04	Colorectal tumor	150	40	17.7778	0	0	1	0	0	0	0	0	1	0		0	0	0	0	0	82	36.9	91	12.1	148	2018-06-05	5	1	0	0	0	0	0	0	0	0	1	2	3	100	167	1600	0		0	70	20	50
81-85	2018-05-23	Colorectal tumor	151	52	22.806	0	0	0	0	0	0	0	0	0	0		0	0	0	0	0	128	40.2	63.1	7.06		2018-06-07	5	1	0	0	0	0	0	0	0	0	0	1	3	179	280	2800	1	500	0	210	10	200
76-80	2018-05-15	Liver tumor	156	52	21.3675	0	1	0	0	0	0	0	0	0	0		0	0	0	0	0	140	45.2	60.7	3.85	55	2018-06-07	5	1	0	0	0	0	0	0	0	0	0	2	2	125	258	3200	1	500	0	500	300	200
46-50	2018-06-05	Adrenal tumor	180	67	20.679	0	0	0	0	0	0	0	0	1	0		0	0	1	0	0	155	40.4	74.23	8.22		2018-06-07	8	0	0	0	0	0	0	1	0	0	0	1	2	91	174	1500	0		0	230	30	200
81-85	2018-06-04	Colorectal tumor	156	45	18.4911	1	0	0	0	0	0	0	0	1	0		0	0	0	0	1	91	34.1	54.5	3.63	135	2018-06-25	5	1	0	0	0	0	0	0	0	0	0	1	3	212	265	3100	1	500	0	850	50	800
86-90	2018-06-05	Skin tumor	153	50	21.3593	0	0	1	0	0	1	0	1	1	0		0	0	0	0	0	113	38.8	82.66	5.37		2018-06-08	3	0	0	1	0	0	0	0	0	0	0		3	134	180	1600	0		0	350	100	250
71-75	2018-06-05	Spinal tumor	170	56	19.3772	1	0	0	0	1	0	0	0	1	0		0	1	1	0	0	97	38.6	268.12	22.17		2018-06-08	8	0	0	0	0	0	0	1	0	0	0		3	251	313	8800	1	3500	1	5650	5500	150
76-80	2018-06-01	Gastric tumor	155	60	24.974	0	0	0	0	0	1	1	0	1	0		0	0	0	0	0	119	38.3	70.18	4.86		2018-06-08	5	1	0	0	0	0	0	0	0	0	0	1	3	289	309	3800	1	1000	0	1300	100	1200
76-80	2018-06-05	BPH	170	68	23.5294	1	0	1	0	0	0	0	0	0	0		0	0	0	0	0	140	41.8	124.18	6.93	67	2018-06-12	8	0	0	0	0	0	0	1	0	0	0		3	53	92	1100	0		0	10	10	NA
81-85	2018-05-30	Colorectal tumor	173	70	23.3887	1	0	0	0	0	0	0	0	1	0		0	0	0	1	0	130	43.9	119.04	5.99		2018-06-12	5	1	0	0	0	0	0	0	0	0	0	1	3	207	295	2350	1	500	0	1100	200	900
71-75	2018-06-08	Prostate tumor	166	61	22.1367	0	0	1	0	0	0	0	0	1	0		0	0	0	0	0	139	42.1	88.46	6.65	174	2018-06-11	8	0	0	0	0	0	0	1	0	0	0	1	3	96	178	1100	0		0	10	10	NA
56-60	2018-04-24	Pharynx tumor	175	70	22.8571	0	0	0	0	0	0	0	0	1	0		0	0	1	0	0	100	30.2	53.54	3		2018-06-06	9	0	0	0	0	0	0	0	1	0	0	2	3	665	813	10450	1	2000	1	1700	900	800
66-70	2018-05-28	Colorectal tumor	170	55	19.0311	1	0	0	0	0	1	1	0	1	0		0	0	0	0	0	137	42.3	81.04	3.78	53	2018-06-12	5	1	0	0	0	0	0	0	0	0	0	1	3	53	189	1500	0		0	260	10	250
86-90	2018-06-04	Esophageal tumor	150	50	22.2222	1	0	0	0	0	0	0	0	1	0		0	0	0	0	0	123	34.3	46.7	6.6	56	2018-06-13	4	0	0	0	1	0	0	0	0	0	0	1	3	49	119	1000	0		0	10	10	NA
76-80	2018-06-01	Breast tumor	152	60	25.9695	0	0	1	0	0	1	0	0	1	0		0	0	0	0	0	140	42	59.2	6.56		2018-06-13	11	0	1	0	0	0	0	0	0	0	0		3	96	143	1000	0		0	10	10	NA
51-55	2018-05-29	Lymphoma	168	65	23.03	0	1	1	0	0	0	1	0	1	0		0	0	0	0	0	129	39.7	88.4	4.77		2018-06-14	5	1	0	0	0	0	0	0	0	0	0	2	3	315	415	3200	1	500	0	700	200	500
66-70	2018-05-28	Colorectal tumor	168	74	26.2188	0	0	0	0	0	0	0	0	1	0		0	0	1	0	0	129	30.1	94.6	5.89	234	2018-06-15	5	1	0	0	0	0	0	0	0	0	0	2	2	166	229	2300	1	1000	0	10	10	NA
56-60	2018-06-11	Colorectal tumor	169	78	27.31	1	0	1	0	0	0	1	0	1	0		0	0	0	0	0	144	44.8	96.4	5.09	17	2018-06-14	5	1	0	0	0	0	0	0	0	0	0	1	2	244	359	3200	1	500	0	710	10	700
76-80	2018-06-13	Renal stone	158	58	23.2335	1	0	0	0	0	0	0	0	1	0		0	0	0	0	0	121	41.8	67.7	5.21	135	2018-06-15	8	0	0	0	0	0	0	1	0	0	0		2	259	317	2700	1	500	0	10	10	NA
66-70	2018-06-13	Bladder tumor	169	95	33.2621	1	1	1	0	0	0	0	0	1	0		0	1	0	0	0	132	41.9	120.2	12.69	18	2018-06-22	8	0	0	0	0	0	0	1	0	0	0	2	3	223	281	3230	1	1000	0	1200	1200	NA
66-70	2018-06-07	Colorectal tumor	158	58	23.2335	1	1	0	1	0	1	0	0	1	0		0	0	0	0	0	106	45.8	67.1	6.1		2018-06-13	5	1	0	0	0	0	0	0	0	0	0	1	3	134	238	1800	0		0	550	50	500
86-90	2018-05-21	Colorectal tumor	170	65	22.4913	1	0	1	1	0	0	0	0	1	0		0	0	0	0	0	93	41.5	106.96	5.84	132	2018-06-15	5	1	0	0	0	0	0	0	0	0	0	1	3	379	497	3600	1	500	0	850	400	450
66-70	2018-06-12	Colorectal tumor	176	73	23.5666	0	0	0	0	0	0	0	1	1	0		0	0	1	0	0	118	36	78.4	7		2018-06-19	5	1	0	0	0	0	0	0	0	0	0	1	2	227	488	2600	1	500	0	210	10	200
91-95	2018-06-12	BPH	165	60	22.0386	1	0	0	0	0	0	1	0	0	0		0	0	0	0	0	139	41.8	111.02	9.76		2018-06-19	8	0	0	0	0	0	0	1	0	0	0		2	42	78	1500	1	500	0	10	10	NA
56-60	2018-06-11	Spinal tumor	165	80	29.3848	1	1	0	0	0	0	0	0	1	0		0	0	0	1	0	155	47.6	69.1	4.65		2018-06-19	3	0	0	1	0	0	0	0	0	0	0		3	218	306	6118	1	1500	1	2900	2500	400
76-80	2018-06-15	Bladder tumor	165	45	16.5289	0	0	0	0	0	0	0	0	1	0		0	0	0	0	0	115	36	74.1	4.64	27	2018-06-19	8	0	0	0	0	0	0	1	0	0	0	1	3	184	295	1601	1	500	0	100	100	NA
66-70	2018-06-11	Lung tumor	169	75	26.2596	0	0	0	0	0	0	0	0	1	0		0	0	1	0	0	157	44.2	81.8	4.49		2018-06-19	4	0	0	0	1	0	0	0	0	0	0	1	2	156	228	800	0		0	210	10	200
46-50	2018-05-29	Adrenal tumor	170	87	30.1038	0	0	0	0	0	0	0	0	1	0		0	0	1	0	0	146	32.4	77.35	2.2	54	2018-06-19	8	0	0	0	0	0	0	1	0	0	0	2	2	391	493	11324	1	2500	1	5788	3500	1300
81-85	2018-06-14	Esophageal tumor	156	66	27.1203	0	0	1	0	0	0	0	0	1	0		0	0	0	0	0	153	41	117.6	6.62		2018-06-20	4	0	0	0	1	0	0	0	0	0	0	2	3	300	423	2100	0		0	600	200	400
66-70	2018-06-01	Cecal tumor	172	60	20.2812	0	0	0	0	0	0	1	0	1	0		0	0	1	0	0	102	41.4	81.35	7.21		2018-06-20	5	1	0	0	0	0	0	0	0	0	0	1	3	217	289	3600	1	500	0	350	50	300
76-80	2017-07-07	Biliary stone	158	50	20.0288	0	0	0	0	0	0	0	0	0	0		0	0	0	0	0	126	28.5	97	8.7		2017-07-07	5	1	0	0	0	0	0	0	0	0	1	2	4	88	169	2100	1	500	0	250	100	150
76-80	2017-06-26	Gastric tumor	163	46	17.3134	1	0	0	0	0	0	0	0	1	0		0	0	0	0	0	128	37.4	121.5	5.86	68	2017-07-07	5	1	0	0	0	0	0	0	0	0	0	1	2	170	254	1600	0		0	150	50	100
81-85	2017-07-05	Ileus	155	48	19.9792	0	0	0	0	0	0	0	0	1	0		0	0	0	0	0	99	32	53.4	12.25	57	2017-07-06	5	1	0	0	0	0	0	0	0	0	0	2	3	126	220	1500	1	500	0	200	50	150
76-80	2017-07-04	Gastric tumor	173	72	24.0569	1	0	0	0	0	0	0	0	1	0		0	0	0	0	0	119	38.9	97.09	4.98	106	2017-07-10	5	1	0	0	0	0	0	0	0	0	0	1	2	368	420	3300	1	1000	0	3300	600	500
56-60	2017-07-06	Ureter stone	175	88	28.7347	1	1	0	0	0	0	1	0	0	0		0	0	0	0	0	124	41.6	114.1	6.44		2017-07-10	8	0	0	0	0	0	0	1	0	0	0		2	34	96	1000	0		0	10	10
56-60	2017-07-06	Adrenal tumor	160	72	28.125	1	1	0	0	0	0	0	0	1	0		0	1	0	0	0	109	39.4	73.4	6.47		2017-07-10	8	0	0	0	0	0	0	1	0	0	0	1	2	77	192	2200	1	500	0	350	50	300
81-85	2017-07-05	Colorectal tumor	170	70	24.2215	1	0	0	0	0	0	0	0	1	0		0	0	0	0	0	68	30.4	83.1	6.81	461	2017-07-11	5	1	0	0	0	0	0	0	0	0	0	2	3	205	300	2600	0		0	300	100	200
76-80	2017-07-03	Prolapse of uterus	148	60	27.3923	1	1	1	0	0	0	1	0	0	0		0	0	0	1	0	129	44.3	91	5.86		2017-07-10	7	0	0	0	0	0	1	0	0	0	0		3	169	213	1500	0		0	10	10
71-75	2017-07-10	Bladder tumor	163	64	24.0882	0	0	0	0	0	0	1	0	1	0		0	0	0	0	0	126	44.2	97.1	6.42		2017-07-11	8	0	0	0	0	0	0	1	0	0	0		3	45	97	1000	0		0	10	10
36-40	2017-07-10	Placenta implantation	165	75	27.5482	0	0	0	0	0	0	0	0	0	0		0	0	0	0	0	86	31.2	51.3	4.7		2017-07-13	7	0	0	0	0	0	1	0	0	0	0	2	1	318	371	12410	0	1000	1	5840	4200	1640
81-85	2017-07-05	Deep infection of neck	164	60	22.3081	1	0	0	0	0	0	0	0	0	0		0	0	0	0	0	129	26.6	64.1	3.93		2017-07-06	9	0	0	0	0	0	0	0	1	0	0		1	51	65	500	0		0	10	10
21-25	2017-07-16	Colorectal rupture	160	53	20.7031	0	0	0	0	0	0	0	0	0	0		0	0	0	0	0	131	30.3	58.24	4	101	2017-07-16	8	0	0	0	0	0	0	1	0	0	1	1	3	145	208	2000	1	500	0	400	10	400
91-95	2017-07-11	Pancreas tumor	174	73	24.1115	1	0	1	0	0	0	0	0	1	0		0	0	0	1	0	93	25.9	121.7	7.84	217	2017-07-11	5	1	0	0	0	0	0	0	0	0	1		4	30	45	500	0		0
26-30	2017-07-17	Morbid oberity	155	105	43.7045	0	1	0	0	0	0	0	0	0	0		0	0	0	0	0	79	27.4	121.7	7.84	217	2017-07-17	5	1	0	0	0	0	0	0	0	0	0	1	3	151	231	1850	0		0	200	100	100
51-55	2017-07-13	Ureteral stone	178	102	32.1929	1	1	0	0	0	0	0	0	0	0		0	0	0	0	0	130	41.4	106.86	4.9		2017-07-17	8	0	0	0	0	0	0	1	0	0	0		2	51	166	1000	0		0	10	10
91-95	2017-07-06	Colorectal tumor	170	80	27.6817	1	0	1	0	0	0	0	0	1	0		0	0	0	1	0	108	32.5	0	0		2017-07-17	5	1	0	0	0	0	0	0	0	0	0	1	3	111	253	2350	1	500	0	150	10	150
51-55	2017-07-12	Adrenal tumor	172	92	31.0979	1	0	0	0	0	0	0	0	0	0		0	0	0	0	0	160	47.8	77.7	4.71		2017-07-17	8	0	0	0	0	0	0	1	0	0	0	1	3	78	169	2000	1	500	0	70	20	50
36-40	2017-06-15	Thymoma	162	53	20.1951	0	0	0	0	1	0	0	0	0	0		0	0	0	0	0	98	36.3	57.45	8.04	72	2017-07-13	4	0	0	0	1	0	0	0	0	0	0	2	1	671	769	7100	1	500	1	2100	1300	800
61-65	2017-08-29	Esophageal tumor	180	82	25.3086	0	0	1	0	0	0	0	0	1	0		0	0	0	0	0	121	24.8	79.6	4.36		2017-09-04	4	0	0	0	1	0	0	0	0	0	0	2	1	784	913	7700	1	2000	1	3800	400	3200
71-75	2017-08-30	Colorectal tumor	178	80	25.2493	1	0	0	0	0	0	1	0	1	0		0	0	0	0	0	159	46.3	93.2	4.67		2017-09-08	5	1	0	0	0	0	0	0	0	0	0	1	1	153	335	2800	1	500	0	330	50	280
61-65	2017-09-05	Arterial stenosis	171	65	22.2291	0	0	0	0	0	0	1	1	0	0		0	0	0	0	0	156	42	83.6	5.78	36	2017-09-12	10	0	0	0	0	0	0	0	0	1	0		1	203	288	1700	1	500	0	1700	10	500
46-50	2017-09-07	Ureter stone	172	88	29.7458	1	0	1	0	0	0	0	0	0	0		0	0	0	0	0	155	39	108.9	5.43		2017-09-12	8	0	0	0	0	0	0	1	0	0	0		3	51	167	1600	0		0	10	10
66-70	2017-09-01	Lung tumor	172	93	31.4359	1	1	0	0	1	0	0	0	1	0		0	0	0	0	0	103	34.4	75.45	6.52		2017-09-12	4	0	0	0	1	0	0	0	0	0	0	1	2	297	534	2100	1	500	0	2100	150	300
76-80	2017-09-01	Colorectal tumor	170	55.3	19.1349	1	1	1	0	0	0	0	0	0	0		0	0	0	0	0	144	51.1	95.7	4.05	203	2017-09-11	9	0	0	0	0	0	0	0	1	0	0	1	2	154	230	1600	0		0	110	10	100
61-65	2017-09-12	Bladder tumor	176	71	22.921	0	1	0	0	0	0	1	0	1	0		0	0	0	0	0	159	43.9	77.2	6.22		2017-09-14	8	0	0	0	0	0	0	1	0	0	0	1	2	259	400	2800	1	500	0	110	10	100
81-85	2017-08-29	Bladder tumor	177	72	22.9819	1	0	0	0	0	0	1	0	1	0		0	0	0	1	0	115	32.2	99.1	8.35	698	2017-09-14	8	0	0	0	0	0	0	1	0	0	0		3	11	72	500	0		0	10	10
86-90	2017-09-10	Acute cholangitis	156	51	20.9566	0	0	0	0	1	0	0	0	0	0		0	0	0	0	0	126	32	50.8	1.8	234	2017-09-11	5	1	0	0	0	0	0	0	0	0	0	2	2	143	188	1700	0		0	560	10	550
66-70	2017-08-31	Gastric tumor	160	48	18.75	1	0	1	0	0	0	0	0	1	0		0	0	0	0	0	93	36.9	66.4	7.82	27	2017-09-14	5	1	0	0	0	0	0	0	0	0	0	2	3	232	306	2659	1	500	0	450	100	350
81-85	2017-08-23	Esophageal tumor	180	55	16.9753	1	0	0	0	0	1	0	0	1	0		0	0	0	0	0	103	31.4	110.54	8.05	147	2017-09-13	5	1	0	0	0	0	0	0	0	0	0	2	3	490	471	3050	1	1000	0	550	100	450
61-65	2017-09-14	Colorectal tumor	170	67	23.1834	0	1	0	0	0	0	0	0	1	0		0	0	1	0	0	116	32.8	68.2	8.14		2017-09-15	5	1	0	0	0	0	0	0	0	0	0	1	2	300	401	4100	1	1500	0	700	200	500
61-65	2017-09-11	Bladder tumor	175	59	19.2653	1	0	0	0	0	0	0	0	1	0		0	0	0	0	0	121	36.7	85.5	5.88		2017-09-13	8	0	0	0	0	0	0	1	0	0	0	2	3	110	164	2500	1	500	1	400	400	NA
66-70	2017-09-12	Pelvic tumor	173	60	20.0474	1	0	0	0	0	0	0	0	0	1	1	0	0	0	0	0	112	36.9	91.56	6.32		2017-09-15	5	1	0	0	0	0	0	0	0	0	0	1	2	159	260	2100	0		0	910	10	900
86-90	2017-09-08	Bladder tumor	170	50	17.301	1	0	0	0	0	0	0	0	1	0		0	0	0	0	0	78	32.7	51.94	3.61		2017-09-15	8	0	0	0	0	0	0	1	0	0	0	2	3	107	200	3100	0		1	150	150	NA
71-75	2017-09-13	Bladder tumor	167	73	26.1752	1	0	0	0	0	0	1	0	1	0		0	0	0	0	0	140	43	77.83	6.01		2017-09-18	8	0	0	0	0	0	0	1	0	0	0		3	31	73	500	0		0	10	10
26-30	2017-09-06	Mediastinum tumor	162	47.5	18.0994	0	0	0	0	1	0	1	0	1	0		0	0	0	0	0	139	46.7	65.5	3.65		2017-09-15	4	0	0	0	1	0	0	0	0	0	0	2	2	109	189	1000	1	1500	0	3500	1000	2500
76-80	2017-09-15	Prostate tumor	169	80	28.0102	1	1	1	0	0	0	0	0	1	0		0	0	0	0	0	137	42.2	121.56	7.04		2017-09-18	8	0	0	0	0	0	0	1	0	0	0	1	2	110	191	1600	1	500	0	300	100	200
86-90	2017-09-12	Colorectal tumor	162	55	20.9572	0	0	0	0	0	0	0	0	1	0		0	0	0	0	0	102	38.6	69.74	3.84	192	2017-09-19	5	1	0	0	0	0	0	0	0	0	0	1	2	128	250	2350	0		0	360	10	350
61-65	2017-09-07	Gastric tumor	165	70	25.7117	0	0	0	0	0	0	0	0	1	0		0	0	0	0	0	164	34.8	84.85	4.2	106	2017-09-13	5	1	0	0	0	0	0	0	0	0	0	2	2	379	445	3300	1	500	0	750	200	550
51-55	2017-07-07	Thymoma	165	78	28.6501	0	0	0	0	0	0	0	0	1	0		0	0	0	0	0	111	36.4	53.6	8.29		2017-08-15	4	0	0	0	1	0	0	0	0	0	0	2	4	215	259	2000	1	500	0	1200	200	1000
76-80	2017-09-12	Cecal tumor	150	65	28.8889	1	0	0	0	0	0	0	0	1	0		0	0	0	0	0	137	43.2	65	7.4		2017-09-18	5	1	0	0	0	0	0	0	0	0	0	1	2	167	360	2100	0		0	550	50	500
16-20	2017-08-24	Mediastinum tumor	178	87	27.4587	0	0	0	0	0	0	0	0	1	0		0	0	0	0	0	153	44.9	76.3	5.87		2017-09-19	4	0	0	0	1	0	0	0	0	0	0	2	3	310	452	4100	1	500	1	1600	400	1200
76-80	2017-09-14	Bladder tumor	178	70	22.0932	1	0	1	0	0	0	0	0	1	0		0	0	0	0	0	98	37	126.7	6.8	126	2017-09-19	8	0	0	0	0	0	0	1	0	0	0	2	2	327	405	8700	1	2000	1	2000	2000	NA
81-85	2017-09-18	Bladder tumor	150	37	16.4444	0	1	0	0	0	0	0	0	1	0		0	0	0	0	0	98	39.4	133	12.25		2017-09-20	8	0	0	0	0	0	0	1	0	0	0		2	81	127	1000	0		0	10	10	NA
71-75	2017-09-14	Retroperitoneal tumor	170	80	27.6817	1	1	1	0	0	0	0	0	0	0		0	0	0	0	0	134	41.3	83.1	4.76		2017-09-20	5	1	0	0	0	0	0	0	0	0	0	2	3	178	243	2600	1	500	0	200	100	100
51-55	2017-09-12	Spinalcompression	158	56	22.4323	0	0	0	0	0	0	0	0	1	0		0	0	0	0	0	89	33.4	74.7	4.53	335	2017-09-20	3	0	0	1	0	0	0	0	0	0	0		2	589	695	5702	1	1000	1	1750	1200	550
76-80	2017-09-13	Liver tumor	160	67.5	26.3672	0	1	0	0	0	0	0	0	1	0		0	0	0	0	0	148	44	78.8	6.19	32	2017-09-21	5	1	0	0	0	0	0	0	0	0	0	1	2	259	332	2600	1	500	0	1100	150	950
76-80	2017-09-11	Colorectal tumor	175	60	19.5918	0	0	1	0	0	0	0	0	1	0		0	0	0	0	0	117	34	83.37	5.71	112	2017-09-20	5	1	0	0	0	0	0	0	0	0	0	2	3	231	318	2100	1	500	0	600	100	500
66-70	2017-09-05	Biliary stone	165	70	25.7117	1	0	0	0	0	0	1	0	0	0		0	0	0	0	0	107	33.2	73.75	8.19	261	2017-09-22	5	1	0	0	0	0	0	0	0	0	0	1	3	322	434	3100	0		0	210	10	210
61-65	2017-09-22	Abdominal trauma	175	72	23.5102	0	0	0	0	0	1	0	0	0	0		0	0	0	0	0	149	41.3	76	8.3		2017-09-22	5	1	0	0	0	0	0	0	0	0	1	2	3	158	241	6000	1	1500	0	600	100	500
81-85	2017-09-18	Colorectal tumor	162	74	28.1969	0	1	1	0	0	1	0	0	1	0		0	0	0	0	0	100	33.2	75.46	4.55		2017-09-22	5	1	0	0	0	0	0	0	0	0	0	1	3	138	227	2000	1	500	0	420	20	400
86-90	2017-09-21	Ileus	168	56	19.8413	1	0	1	0	0	0	1	0	1	0		0	0	0	0	0	112	39.2	80.07	5.42		2017-09-22	5	1	0	0	0	0	0	0	0	0	0	1	3	292	258	2800	1	500	0	600	50	550
76-80	2017-09-24	Appendicitis	172	70	23.6614	0	0	0	0	0	0	0	0	0	0		0	0	0	0	0	136	42.2				2017-09-24	5	1	0	0	0	0	0	0	0	0	1	1	2	33	84	1100	0		0	410	10	400
86-90	2017-09-21	Ileus	175	70	22.8571	1	1	0	0	0	0	0	0	1	0		0	0	0	0	0	97	28.7	100.8	10.13	1264	2017-09-22	5	1	0	0	0	0	0	0	0	0	0	1	3	145	255	1100	0		0	500	100	400
21-25	2017-09-15	Ileus	175	51.5	16.8163	0	0	0	0	0	0	0	0	0	0		0	0	1	0	0	136	40.7	75.9	2.61		2017-09-24	5	1	0	0	0	0	0	0	0	0	0	2	3	111	180	1500	1	500	0	110	10	100
26-30	2017-09-20	Adrenal tumor	183	84	25.0829	1	0	0	0	0	0	0	0	0	0		0	0	0	0	0	163	47	86.66	3.66	6	2017-09-25	8	0	0	0	0	0	0	1	0	0	0	1	2	82	158	3100	1	1000	0	550	50	500
56-60	2017-09-24	Spleen rupture	150	70	31.1111	0	0	0	0	0	0	0	0	0	0		0	0	0	0	0	86	31.2	50	4.4	95	2017-09-24	5	1	0	0	0	0	0	0	0	0	1	2	2	148	260	5250	1	1000	1	1900	1500	400
61-65	2017-09-14	Spinal tumor	174	67	22.1297	1	0	1	0	0	1	0	0	1	0		0	0	1	1	0	143	38.9	94	5.86	36	2017-09-25	3	0	0	1	0	0	0	0	0	0	0		3	189	303	2800	1	1000	0	10	10
41-45	2017-10-27	Thyroid tumor	155	68	28.3039	1	0	0	0	0	0	0	0	1	0		0	0	0	0	0	144	45.1	62.99	3.67		2017-10-31	11	0	1	0	0	0	0	0	0	0	0		1	134	172	1200	0		0	10	10
61-65	2017-10-30	Prostate tumor	170	62	21.4533	0	0	0	0	0	1	0	0	1	0		0	0	0	0	0	152	46.9	57.3	7.37	18	2017-11-01	8	0	0	0	0	0	0	1	0	0	0	1	2	113	169	1500	1	500	0	10	10
51-55	2017-10-10	IBD	162	55	20.9572	0	0	0	0	0	0	0	0	0	0		0	0	0	0	0	84	27.5	40.1	4.91	95	2017-10-31	5	1	0	0	0	0	0	0	0	0	0	1	2	431	509	6350	1	1000	0	1250	50	1200
56-60	2017-09-19	Biliary tumor	160	74	28.9062	1	1	0	0	0	0	0	0	1	0		0	0	0	0	0	118	34.6	62.21	2.43	633	2017-10-31	5	1	0	0	0	0	0	0	0	0	0	2	2	187	308	4000	1	500	1	450	10	450
76-80	2017-10-26	Spinal osteoarthritis	160	75	29.2969	1	1	0	0	0	1	0	0	0	0		0	0	1	0	0	128	38.2	78	6.71	31	2017-11-01	3	0	0	1	0	0	0	0	0	0	0		3	228	303	1700	0		1	600	400	200
71-75	2017-10-27	Biliary tumor	170	58	20.0692	0	0	0	0	0	0	0	0	1	0		0	0	0	0	0	125	34.6	56.47	3.74		2017-11-01	5	1	0	0	0	0	0	0	0	0	0	2	2	489	564	7500	1	1500	1	2600	1600	1000
36-40	2017-10-20	VHL Syndrome	172	66	22.3094	0	1	0	0	0	0	0	0	0	0		0	0	0	0	0	143	34.4	69.5	4.46		2017-11-02	6	0	0	0	0	1	0	0	0	0	0		2	243	318	3650	1	1000	0	1440	500	840
61-65	2017-10-23	Colorectal tumor	165	65	23.8751	1	0	0	0	0	0	0	0	1	0		0	0	0	0	0	129	42.9	129.58	6.18		2017-11-02	5	1	0	0	0	0	0	0	0	0	0	2	2	403	474	7581	1	2000	1	2161	800
61-65	2017-11-02	Digestive tract perforation	170	48	16.609	0	0	0	0	0	0	1	0	0	0		0	0	0	0	0	153	36.1	106	16.5	69	2017-11-03	5	1	0	0	0	0	0	0	0	0	0	1	3	47	143	2000	1	500	0	10	10
51-55	2017-10-30	Colorectal tumor	175	86	28.0816	1	0	0	0	0	0	0	0	1	0		0	0	1	0	0	155	45.2	67.35	4.7	23	2017-11-03	5	1	0	0	0	0	0	0	0	0	0	1	2	199	294	2850	1	500	0	250	50	200
81-85	2017-10-27	Colorectal tumor	167	65	23.3067	0	1	0	0	0	0	0	0	1	0		0	0	0	0	0	106	37.2	137.88	9.42		2017-11-03	5	1	0	0	0	0	0	0	0	0	0	1	3	319	426	3650	1	500	0	550	50	500
66-70	2017-11-03	Ureter stone	155	80	33.2986	1	0	1	0	0	0	0	0	0	0		0	0	0	0	0	150	44.4	98.1	7.59	122	2017-11-06	8	0	0	0	0	0	0	1	0	0	0		3	16	71	600	0		0	10	10
26-30	2017-11-03	Adrenal tumor	162	55	20.9572	0	0	0	0	0	0	0	0	0	0		0	0	0	0	0	129	44.8	68.2	4.09		2017-11-06	8	0	0	0	0	0	0	1	0	0	0	1	1	32	100	1100	0		0	530	30	500
61-65	2017-10-19	Colorectal tumor	170	90	31.1419	1	0	1	0	0	0	0	0	1	0		0	0	1	0	0	138	42	68	6.23		2017-11-06	5	1	0	0	0	0	0	0	0	0	0	2	3	303	387	3300	1	500	0	550	150	400
81-85	2017-11-01	Peritonitis	177	63	20.1092	0	0	0	0	0	0	1	0	0	0		0	0	0	0	0	137	29.9	57	6.47	446	2017-11-01	5	1	0	0	0	0	0	0	0	0	1	2	3	132	236	1100	0		0	20	20
66-70	2017-11-01	Bowel mesenteric volvulus	165	54	19.8347	0	1	0	0	0	1	0	0	0	0		0	0	0	0	0	152	41.8	87	5.08	19	2017-11-07	5	1	0	0	0	0	0	0	0	0	0	1	2	111	215	2100	1	500	0	810	10	800
41-45	2017-11-02	Spinal tumor	170	80	27.6817	0	0	0	0	0	0	0	0	1	0		0	0	1	0	0	151	46.8	69.5	5.83		2017-11-06	3	0	0	1	0	0	0	0	0	0	0		3	818	1058	14908	1	2500	1	5155	3400	6500
66-70	2017-11-03	Spinal tuberculosis	168	60	21.2585	0	0	0	0	0	0	0	0	0	0		0	0	1	0	0	115	32.9	114	6.4	99	2017-11-08	3	0	0	1	0	0	0	0	0	0	0		3	261	375	2100	0		1	8000	500	300
66-70	2017-10-17	Colorectal tumor	158	63	25.2363	1	0	0	0	0	0	0	0	1	0		0	0	0	0	0	114	45.4	44.4	3.49	99	2017-11-08	5	1	0	0	0	0	0	0	0	0	0	2	2	134	199	2350	1	500	0	350	100	250
71-75	2017-10-26	Colorectal tumor	174	75	24.7721	0	0	1	0	0	0	0	0	1	1	2	0	0	0	0	1	121	38.1	104.6	5.9	76	2017-10-26	5	1	0	0	0	0	0	0	0	0	0	1	2	120	183	2300	0		0	260	10	250
81-85	2017-11-10	Colorectal tumor	169	58	20.3074	1	1	0	0	0	0	1	0	1	0		0	0	0	0	1	84	38.6	70.47	3.4		2017-11-17	5	1	0	0	0	0	0	0	0	0	0	1	3	128	228	2100	0		1	100	10	100
56-60	2017-11-15	Ulcerative colitis	170	47	16.263	1	1	0	0	1	1	0	0	0	0		0	0	0	0	0	105	29.3	72.36	9.08	152	2017-11-17	5	1	0	0	0	0	0	0	0	0	0	2	4	488	592	8850	0		0	1850	500	1150
71-75	2017-11-14	ICH	167	70	25.0995	0	0	0	0	0	0	0	0	0	0		0	0	0	0	0		39				2017-11-14	6	0	0	0	0	1	0	0	0	0	1		4	137	224	1500	0		0	600	200	400
66-70	2017-11-09	Colorectal tumor	173	65	21.7181	1	0	0	0	0	1	0	0	1	0		0	0	0	0	0	156	32.4	92.28	8.46	15	2017-11-20	5	1	0	0	0	0	0	0	0	0	0	1	2	189	256	2300	1	1000	0	600	10	600
66-70	2017-11-15	Biliary stone	160	65	25.3906	1	0	0	0	0	0	1	0	0	0		0	0	0	1	0	140	44.8	55.51	5.4	70	2017-11-20	5	1	0	0	0	0	0	0	0	0	0	1	3	158	266	3100	1	500	0	200	100	100
66-70	2017-11-16	Lung tumor	166	65.5	23.7698	1	1	0	0	0	0	0	0	1	0		0	0	0	1	0	165	44.6	94.13	5.71	38	2017-11-21	4	0	0	0	1	0	0	0	0	0	0	1	3	348	401	2100	1	500	0	450	150	300
76-80	2017-11-01	Colorectal tumor	161	65	25.0762	1	0	1	0	0	0	1	0	1	0		0	0	0	1	1	142	34.7	72.96	4.89		2017-11-21	5	1	0	0	0	0	0	0	0	0	0	2	2	241	305	2700	1	500	0	900	300	600
66-70	2017-11-09	Colorectal tumor	172	70	23.6614	1	1	0	0	0	0	0	0	1	0		0	0	0	1	0	85	40.7	69	3.71		2017-11-22	5	1	0	0	0	0	0	0	0	0	0	1	3	229	319	3750	1	500	1	1130	30	1100
86-90	2017-11-20	Gastric tumor	153	34	14.5243	0	0	0	0	1	0	0	0	1	0		0	0	0	0	1	118	42.3	61.09	8.42		2017-11-23	5	1	0	0	0	0	0	0	0	0	0	1	2	133	221	2100	0		0	780	80	700
66-70	2017-09-05	Pyloric obstruction	176	40	12.9132	0	0	0	0	0	0	1	0	0	0		0	0	0	0	1	86	30	50.6	7.07	127	2017-11-24	5	1	0	0	0	0	0	0	0	0	0	2	3	100	171	2450	1	500	0	150	10	150
66-70	2017-11-20	Bladder tumor	173	63	21.0498	0	0	1	0	0	0	0	0	1	0		0	0	0	0	0	121	40.2	91.32	6.77		2017-11-22	8	0	0	0	0	0	0	1	0	0	0	1	3	205	351	3500	1	500	0	100	100
46-50	2017-11-16	Thymoma	158	49	19.6283	0	1	0	0	0	0	0	0	0	0		0	0	0	0	0	121	40.2	91.32	6.77		2017-11-22	4	0	0	0	1	0	0	0	0	0	0	1	2	221	304	1500	1	500	0	10	10
71-75	2017-11-03	Gastric tumor	169	85	29.7609	1	0	0	0	0	0	1	0	1	0		0	0	0	1	1	126	37.3	107.7	5.18		2017-11-21	5	1	0	0	0	0	0	0	0	0	0	2	3	222	300	2100	1	500	0	400	100	300
76-80	2017-11-26	Colonic volvulus	161	53	20.4467	0	0	0	0	0	0	0	0	0	0		0	0	0	0	1	102	39.8	94	10.4	160	2017-11-26	5	1	0	0	0	0	0	0	0	0	1	2	2	133	226	1950	1	500	0	150	50	100
76-80	2017-10-30	Biliary tumor	172	73	24.6755	1	0	1	0	0	0	0	0	1	0		0	0	0	0	0	113	38.6	67.35	3.71	115	2017-11-24	5	1	0	0	0	0	0	0	0	0	0	2	3	473	565	9400	1	2000	1	4300	3700	600
61-66	2017-11-27	Appendicitis	173	83	27.7323	0	0	0	0	0	0	0	0	0	0		0	0	0	0	0	145	41.6	64	3.6	46	2017-11-27	5	1	0	0	0	0	0	0	0	0	1	1	2	56	223	2100	0		0	800	10	800
76-80	2017-11-21	Colorectal tumor	170	65	22.4913	0	0	0	0	0	0	0	0	0	0		0	0	0	0	0	108	40.1	77.03	4.47		2017-11-29	5	1	0	0	0	0	0	0	0	0	0	1	2	228	288	2100	1	500	0	150	10	150
41-45	2017-11-22	Bladder tumor	156	55	22.6003	0	0	0	0	0	0	0	0	1	0		0	0	0	0	1	78	45.4	101.7	9.61		2017-11-28	5	1	0	0	0	0	0	0	0	0	0	2	2	481	470	3300	1	500	1	550	400	150
66-70	2017-11-24	Hematuria	170	100	34.6021	1	1	1	0	0	0	0	0	1	0		0	0	0	0	1	108	30.5	269.7	14.26		2017-11-28	8	0	0	0	0	0	0	1	0	0	0		3	22	115	500	0		0	10	10
56-60	2017-11-30	Colorectal tumor	172	72	24.3375	0	1	1	0	0	0	0	0	1	0		0	0	1	0	1	143	44.3	59.6	7.98	23	2017-12-14	5	1	0	0	0	0	0	0	0	0	0	1	3	226	329	3100	0		0	600	100	500
81-85	2017-12-27	Thyroid tumor	148	72	32.8707	1	0	1	0	0	0	1	0	1	0		0	1	0	0	0	139	39.9	114.3	8.19	118	2017-12-28	5	1	0	0	0	0	0	0	0	0	0	2	3	28	70	500	0		0	10	10
46-50	2017-12-21	Colorectal tumor	155	70	29.1363	0	0	0	0	0	0	0	0	1	0		0	0	0	0	1	110	38.1	58	4.06		2017-12-28	5	1	0	0	0	0	0	0	0	0	0	2	3	344	446	5050	1	500	1	1400	300	1100
76-80	2017-12-28	Breast tumor	165	54	19.8347	1	0	0	0	0	0	0	0	1	0		0	0	0	0	0	131	42.6	55.1	4		2018-01-02	5	1	0	0	0	0	0	0	0	0	0		2	77	135	500	0		0	10	10
56-60	2017-12-26	Colorectal tumor	156	78	32.0513	0	0	0	0	0	0	0	0	1	0		0	0	1	0	0	131	37.7	76.5	6.2	36	2018-01-02	5	1	0	0	0	0	0	0	0	0	0	2	2	182	240	2600	1	500	0	250	10	250
51-55	2017-12-29	Adrenal tumor	180	80	24.6914	1	1	0	0	0	0	0	0	0	0		0	0	0	0	0	137	46.5	53.1	4.17		2018-01-02	8	0	0	0	0	0	0	1	0	0	0	1	2	88	204	1700	0		0	520	20	500
76-80	2017-12-28	Colorectal tumor	170	70	24.2215	1	0	1	0	0	0	1	0	1	0		0	0	0	0	0	151	46.2	93.6	6.76	47	2018-01-02	5	1	0	0	0	0	0	0	0	0	0	1	2	77	193	2100	0		0	100	10	100
46-50	2017-12-27	Renal stone	176	85	27.4406	0	1	1	0	0	0	0	0	0	0		0	0	0	0	0	133	47.6	98.2	5.95	71	2018-01-02	8	0	0	0	0	0	0	1	0	0	0		2	67	133	600	0		0	10	10
66-70	2017-12-25	Colorectal tumor	168	74	26.2188	0	0	1	0	0	0	0	0	1	0		0	0	0	0	0	136	38.9	66.97	4.86	16	2018-01-02	5	1	0	0	0	0	0	0	0	0	0	2	2	482	552	9550	1	2000	1	1050	500	550
51-55	2018-01-02	Spinal tumor	161	71	27.3909	0	0	0	0	0	0	0	0	1	0		0	0	0	0	0	131	37.2	66.2	4.48		2018-01-03	3	0	0	1	0	0	0	0	0	0	0		2	521	612	7700	1	1000	1	4100	1600	2500
81-85	2018-01-02	Breast tumor	160	70	27.3438	1	0	0	0	0	0	0	0	1	0		0	0	0	0	0	126	46.4	67.88	4.5		2018-01-03	11	0	1	0	0	0	0	0	0	0	0		3	57	145	500	0		0	10	10
56-60	2018-01-03	Thyroid tumor	157	74	30.0215	1	1	1	0	0	0	1	0	1	0		0	0	0	0	0	138	45.7	68.15	6.41		2018-01-04	5	1	0	0	0	0	0	0	0	0	0		3	58	107	1000	0		0	10	10
41-45	2017-12-22	Adrenal tumor	160	49.2	19.2188	0	0	0	0	0	0	0	0	0	0		0	0	0	0	0	111	43.7	50.1	3.52	64	2018-01-05	8	0	0	0	0	0	0	1	0	0	0	1	2	145	230	2800	1	1000	0	500	100	400
86-90	2018-01-05	Fracture	163	60	22.5827	1	0	0	0	0	0	0	0	0	0		0	0	0	0	0	126	38.1	58.1	5.07	738	2018-01-08	3	0	0	1	0	0	0	0	0	0	0		3	87	195	1600	1	500	0	10	10
61-65	2018-01-04	Spinal osteoarthritis	164	49	18.2183	1	0	0	0	0	0	0	0	0	0		0	0	0	1	0	131	37.4	45.37	4.32	82	2018-01-08	3	0	0	1	0	0	0	0	0	0	0		2	227	435	8250	1	1200	1	2500	1000	1500
61-65	2018-01-03	Spinal tumor	170	60	20.7612	1	1	1	0	0	0	0	0	0	0		0	0	1	0	0	130	47.1	87	5.52		2018-01-08	3	0	0	1	0	0	0	0	0	0	0		3	428	542	6500	1	1500	1	1400	1000	400
61-65	2018-01-05	Adrenal tumor	156	65	26.7094	1	0	0	0	0	0	1	0	0	0		0	0	0	0	0	128	42.5	65.67	4.68	64	2018-01-08	8	0	0	0	0	0	0	1	0	0	0	1	2	89	135	1500	0		0	250	100	150
71-75	2018-01-08	Spinal tumor	165	57.5	21.1203	0	1	0	0	0	0	0	0	1	1	2	0	0	0	0	0		27.6				2018-01-09	3	0	0	1	0	0	0	0	0	0	0		2	193	307	3100	1	500	0	1000	500	500
71-75	2018-01-22	Colorectal tumor	168	63	22.3214	1	0	0	0	0	0	0	0	1	0		0	0	1	0	0	152	45.9	82.92	6.28	51	2018-01-25	5	1	0	0	0	0	0	0	0	0	0	1	2	196	277	3850	0		0	830	30	800
61-65	2018-01-08	Duodenum tumor	172	75	25.3515	0	0	0	0	0	0	0	0	0	0		0	0	0	0	0	90	33.1	63.8	2.98	58	2018-01-22	5	1	0	0	0	0	0	0	0	0	0	2	2	501	449	5200	1	500	1	1300	400	900
81-85	2018-01-17	Colorectal tumor	155	62	25.8065	0	1	1	0	0	0	0	0	0	0		0	0	0	0	0	136	47.5	59.8	6.89		2018-01-26	5	1	0	0	0	0	0	0	0	0	0	1	2	195	286	3050	1	500	0	100	10	100
81-85	2018-01-22	Biliary stone	156	65	26.7094	1	0	0	0	0	0	0	0	0	0		0	0	0	0	0	117	39.6	87.8	6.61		2018-01-26	5	1	0	0	0	0	0	0	0	0	0	1	3	59	127	500	0		0	100	10	100
61-65	2018-01-09	Esophageal tumor	160	53.5	20.8984	1	0	0	0	0	0	1	0	1	0		0	0	0	0	0	133	40.9	54.16	3.89	258	2018-01-24	4	0	0	0	1	0	0	0	0	0	0	2	3	355	437	3600	1	500	0	1000	150	850
81-85	2018-01-24	Fracture	172	75	25.3515	1	1	0	0	0	0	0	0	0	0		0	0	0	0	0	123	35.4	116	7.81		2018-01-26	3	0	0	1	0	0	0	0	0	0	0		3	68	142	1100	0		0	1100	200	800
46-50	2018-01-23	Spinal tumor	178	110	34.7178	1	1	0	0	0	0	0	0	1	0		0	1	0	0	0	132	47	103.93	6.61		2018-01-29	3	0	0	1	0	0	0	0	0	0	0		3	339	439	7300	1	1000	1	1650	1200	450
61-65	2018-01-18	Pituitary tumor	170	63	21.7993	1	1	1	0	0	0	0	0	0	1	3	0	0	0	0	0	107	24.2	130.4	15.77	78	2018-01-29	6	0	0	0	0	1	0	0	0	0	0		4	106	250	1200	1	100	1	350	200	150
76-80	2018-01-26	Bladder tumor	176	72	23.2438	0	0	0	0	0	1	1	0	1	0		0	0	0	0	0	140	38.2	78.39	5.96		2018-01-29	8	0	0	0	0	0	0	1	0	0	0		2	48	98	1000	0		0	10	10
71-75	2018-01-05	Bladder tumor	173	76	25.3934	1	0	0	0	0	0	1	0	1	0		0	0	0	0	0	171	44.8	78.9	5.22	42	2018-01-25	8	0	0	0	0	0	0	1	0	0	0	2	2	145	204	3300	1	1000	0	900	500	400
71-75	2018-01-31	Spinal tumor	162	60	22.8624	0	0	0	0	0	0	0	0	1	0		0	0	0	0	0	146	41.9	80.9	9.39		2018-01-31	3	0	0	1	0	0	0	0	0	0	0		3	217	357	5400	1	1000	1	4050	2000	1650
66-70	2018-01-16	Obstructive jaundice	176	75	24.2123	1	0	0	0	0	0	0	0	1	0		0	0	0	0	0	151	47.8	118.1	9.27	98	2018-01-29	5	1	0	0	0	0	0	0	0	0	0	2	2	312	331	7500	1	2000	1	3460	2500	960
61-65	2018-01-31	Prostate tumor	172	73	24.6755	1	0	1	0	0	0	1	0	1	0		0	0	0	0	0	140	41.1	77.54	4.72	46	2018-02-01	8	0	0	0	0	0	0	1	0	0	0	1	2	69	167	1100	0		0	10	10
76-80	2018-01-29	Fracture	158	70	28.0404	1	0	0	0	0	0	1	1	1	0		0	0	0	0	0	120	43.5	64.3	8.2	364	2018-02-01	3	0	0	1	0	0	0	0	0	0	0		3	194	320	2600	1	500	0	200	100	100
36-40	2018-01-26	Retroperitoneal tumor	155	60	24.974	1	0	0	0	0	0	0	0	0	0		0	0	0	0	0	114	47.1	54.83	4.43	27	2018-02-02	8	0	0	0	0	0	0	1	0	0	0	1	2	150	226	4600	1	1000	0	700	100	600
71-75	2018-01-25	Gastric tumor	172	75	25.3515	0	0	0	0	0	0	0	0	0	0		0	0	0	0	0	115	34.7	72.7	5.26	123	2018-02-01	5	1	0	0	0	0	0	0	0	0	0	2	2	299	349	7500	1	1500	1	3660	3000	660
56-60	2018-02-22	Colorectal tumor	168	67.25	23.8272	0	0	0	0	0	0	0	0	1	1	4	0	0	0	0	0	97	26.8	219	15.67		2018-02-26	5	1	0	0	0	0	0	0	0	0	0	1	3	160	299	2900	0		1	150	100	50
71-75	2018-02-24	Lung tumor	173	75	25.0593	0	1	1	0	0	1	0	0	1	0		0	0	0	0	1	135	39.4	88.8	4.28	86	2018-03-01	4	0	0	0	1	0	0	0	0	0	0	1	2	224	325	1200	0		0	370	20	350
76-80	2018-02-27	Colorectal tumor	170	75	25.9516	0	0	0	0	0	0	0	0	1	0		0	0	1	0	0	149	40.6	85.1	5.09		2018-03-02	5	1	0	0	0	0	0	0	0	0	0	1	3	109	289	2100	1	500	0	400	10	400
36-40	2018-02-27	Adrenal tumor	175	63.5	20.7347	1	0	0	0	1	0	0	0	0	0		0	0	0	0	0	146	47.9	68.6	4.03		2018-03-01	8	0	0	0	0	0	0	1	0	0	0	1	3	64	140	2250	1	500	0	150	10	150
61-65	2018-02-27	Adrenal tumor	175	61	19.9184	1	0	0	0	0	0	0	0	0	0		0	0	1	0	0	123	38.3	88.1	6.56		2018-03-01	8	0	0	0	0	0	0	1	0	0	0	1	3	142	224	3800	1	1000	0	600	100	500
46-50	2018-02-24	Obstructive jaundice	170	59	20.4152	0	0	0	0	0	0	0	0	1	0		0	0	0	0	0	138	41	64.3	3.59		2018-02-27	5	1	0	0	0	0	0	0	0	0	0	2	2	132	202	1600	0		0	500	100	400
31-35	2018-02-28	Pregnancy with preeclampsia	160	74	28.9062	0	0	0	0	0	0	0	0	0	0		0	0	0	0	0	135	38	52.4	3.6	58	2018-03-03	7	0	0	0	0	0	1	0	0	0	0	2	2	87	147	1550	1	150	1	750	400	350
76-80	2018-02-18	Ileus	168	45	15.9439	1	0	0	0	0	0	1	0	1	0		0	0	1	0	0	122	33.3	73.9	8.45	1025	2018-02-22	5	1	0	0	0	0	0	0	0	0	0	2	4	83	152	2500	0		0	200	10	200
81-85	2018-02-18	Biliary stone	155	57	23.7253	1	1	1	0	0	0	0	0	0	0		0	0	0	0	0	85	30.2	66.5	7.48	335	2018-03-05	5	1	0	0	0	0	0	0	0	0	0	1	3	37	88	1500	0		0	10	10
56-60	2018-03-01	Adrenal tumor	170	70	24.2215	1	1	1	0	0	0	0	0	0	0		0	0	0	0	0	150	46.8	82.46	6.46	26	2018-03-05	8	0	0	0	0	0	0	1	0	0	0	1	2	50	110	2000	1	500	0	10	10
71-75	2018-02-26	Arterial stenosis	171	75	25.6489	1	1	1	0	0	0	1	0	0	0		0	0	0	0	0	147	36.3	77.68	6.58	198	2018-03-06	10	0	0	0	0	0	0	0	0	1	0		3	133	226	1350	0		0	1270	20	1250
71-75	2018-02-23	Meningioma	150	41	18.2222	1	1	1	0	0	0	0	1	0	0		0	0	0	0	1	102	33.7	64.3	5.92	429	2018-02-28	34	0	0	0	0	0	0	0	0	0	0		2	248	408	2850	0		0	2100	100	2000
56-60	2018-02-22	Colorectal tumor	169	77.5	27.1349	1	1	1	0	0	0	0	0	1	0		0	0	0	0	1	89	43.7	60	5.19	227	2018-03-06	5	1	0	0	0	0	0	0	0	0	0	1	3	161	267	1750	0		1	200	50	150
66-70	2018-02-27	Gastric tumor	158	58	23.2335	1	0	0	0	0	0	0	0	1	0		0	0	0	0	0	132	43.9	64.2	4.46		2018-03-07	5	1	0	0	0	0	0	0	0	0	0	2	2	229	290	2850	1	500	0	550	100	450
91-95	2018-03-06	Polyp of vorcal cord	148	78	35.6099	1	0	0	0	0	0	0	0	0	0		0	0	0	0	0	107	24.9	70.1	6.21	430	2018-03-07	9	0	0	0	0	0	0	0	1	0	0		4	22	89	500	0		0	10	10
71-75	2018-02-28	Gastric tumor	164	87	32.3468	0	1	1	0	0	0	0	0	1	0		0	0	1	0	0	137	42.3	73.7	5.6		2018-03-05	5	1	0	0	0	0	0	0	0	0	0	1	3	179	264	2200	1	500	0	300	100	200
46-50	2018-03-07	Mesenteric venous thrombosis	170	75	25.9516	0	0	0	0	0	0	0	0	0	0		0	0	0	0	0	206	31.1	310	9	163	2018-03-07	5	1	0	0	0	0	0	0	0	0	1	2	4	139	257	5050	0		1	400	50	350
76-80	2018-02-27	Prosopalgia	164	55	20.4491	1	0	0	0	0	0	0	0	0	0		0	0	0	0	1	139	44.3	82.4	9.81		2018-03-07	6	0	0	0	0	1	0	0	0	0	0		3	151	242	2100	1	500	0	1650	50	1600
66-70	2018-02-24	Colorectal tumor	172	65	21.9713	0	1	1	0	0	0	0	0	1	0		0	0	0	0	0	72	34.7	56.5	5.35		2018-03-08	5	1	0	0	0	0	0	0	0	0	0	1	3	188	255	2800	1	500	0	300	10	300
66-70	2018-03-07	Femoral head necrosis	155	65	27.0552	1	0	1	0	0	0	0	0	0	1	1	0	0	0	0	0	134	35.7	57.78	4.38	43	2018-03-07	3	0	0	1	0	0	0	0	0	0	1		3	75	149	2100	0		0	500	200	300
81-85	2018-03-26	Bladder tumor	173	53	17.7086	1	0	0	0	0	0	0	0	1	0		0	0	0	0	0	111	38.8	106	10.3	300	2018-03-28	8	0	0	0	0	0	0	1	0	0	0	2	3	133	183	2000	0		0	400	400
41-45	2018-03-22	Bladder tumor	160	58.5	22.8516	0	0	0	0	0	0	0	0	1	0		0	0	0	0	0	77	26.3	54.1	3.47		2018-03-26	8	0	0	0	0	0	0	1	0	0	0	2	3	204	318	2300	1	500	0	300	300
51-55	2018-03-19	Diabetic foot	155	68	28.3039	1	1	1	0	0	0	1	0	0	0		0	0	0	0	0	119	40.5	72.02	6.58	86	2018-03-27	10	0	0	0	0	0	0	0	0	1	0		3	144	252	2100	1	500	0	550	50	500
81-85	2018-03-27	Bladder tumor	163	55	20.7008	1	0	1	0	0	0	0	0	1	0		0	1	0	0	0	133	37.2	118.2	6.79	50	2018-03-29	8	0	0	0	0	0	0	1	0	0	0		3	14	67	600	0		0	10	10
31-35	2018-03-28	Retroperitoneal tumor	173	73	24.3911	1	0	0	0	0	0	0	0	0	0		0	0	0	0	0	143	43.1	60.7	4.02	14	2018-03-29	8	0	0	0	0	0	0	1	0	0	0	1	2	260	338	4600	1	500	1	1250	1000	250
56-60	2018-03-20	Arterial aneurysm	180	106	32.716	1	0	0	0	0	0	0	0	0	0		0	0	0	0	0	161	43.2	86.58	7.12	126	2018-03-29	10	0	0	0	0	0	0	0	0	1	0	2	3	478	556	5850	1	1000	0	2700	1700	600
71-75	2018-03-27	Bladder tumor	158	62	24.8358	1	1	1	1	0	0	0	0	1	1	4	0	0	0	0	0	102	37	150.2	13.47		2018-03-30	11	0	1	0	0	0	0	0	0	0	0		3	31	78	1000	0		0	10	10
36-40	2018-03-26	Spinalcompression	152	65	28.1337	0	0	0	0	0	0	0	0	0	0		0	0	0	0	0	175	39.6	99	3.59	5	2018-03-30	3	0	0	1	0	0	0	0	0	0	0		3	352	489	5350	1	500	1	3000	1500	1500
86-90	2018-03-31	Hernia	157	45	18.2563	1	1	0	0	0	0	1	0	0	0		0	0	0	0	0	125	42.1	70.1	11.17		2018-03-31	5	1	0	0	0	0	0	0	0	0	1		3	75	122	1500	0		0	170	20	150
31-35	2018-03-26	Pregnancy with preeclampsia	170	78	26.9896	0	0	0	0	1	0	0	0	0	0		0	0	0	0	0	97	24.5	59.3	3.16		2018-03-29	7	0	0	0	0	0	1	0	0	0	0	2	3	55	119	1402	0		1	450	300	150
76-80	2018-03-19	Duodenum tumor	167	60	21.5139	1	0	1	0	0	0	0	0	0	0		0	0	1	0	0	141	45.7	74.5	6.49	70	2018-03-28	5	1	0	0	0	0	0	0	0	0	0	2	3	220	287	2200	1	500	0	500	200	300
31-35	2018-03-28	Pregnancy with cardiomyopathy	165	63	23.1405	0	0	0	0	0	0	0	0	0	0		0	0	0	0	0	120	33.3	55.27	2.43		2018-04-02	7	0	0	0	0	0	1	0	0	0	0	2	3	37	113	900	0		0	850	800	50
76-80	2018-03-26	Humerus tumor	168	58	20.5499	1	1	1	0	0	1	0	0	1	0		0	1	1	0	0	138	35.4	93.6	6.21		2018-04-02	3	0	0	1	0	0	0	0	0	0	0		3	224	317	3100	1	500	0	400	300	100
76-80	2018-03-21	ICH	162	62	23.6244	1	1	0	0	0	0	0	0	0	0		0	0	0	0	0	171	38.6	61	6.07	271	2018-03-21	6	0	0	0	0	1	0	0	0	0	1		4	179	262	2600	1	500	0	1050	200	850
71-75	2018-03-29	Prostate tumor	175	74	24.1633	0	0	0	0	0	0	1	0	1	0		0	0	0	0	0	152	40.7	86.13	5.19		2018-04-02	8	0	0	0	0	0	0	1	0	0	0	1	3	100	173	1600	0		0	275	200	75
81-85	2018-03-21	Arterial stenosis	158	44	17.6254	0	0	0	0	0	0	0	0	0	0		0	0	0	1	0	93	29.6	125.5	6.74	2265	2018-04-13	10	0	0	0	0	0	0	0	0	1	0		3	138	208	1500	0		0	200	10	200
21-25	2018-03-20	Thyroid tumor	165	57	20.9366	0	0	0	0	0	0	0	0	1	0		0	0	0	0	1	161	49.5	75.41	3.81		2018-04-03	11	0	1	0	0	0	0	0	0	0	0		1	545	639	4300	1	500	0	2750	300	2450
81-85	2018-03-22	Gastric tumor	165	50	18.3655	1	0	0	0	0	0	0	0	1	0		0	0	0	0	1	81	29.8	73.12	4.91	118	2018-04-04	5	1	0	0	0	0	0	0	0	0	0	1	2	160	242	2300	1	200	0	210	10	200
46-50	2018-04-02	Pelvic tumor	170	72	24.9135	0	0	0	0	0	0	0	0	1	0		0	0	0	0	0	112	29.5	52.6	4.59	181	2018-04-04	5	1	0	0	0	0	0	0	0	0	0	2	2	363	443	5600	1	1000	0	2000	200	1800
61-65	2018-03-30	Breast tumor	147	78	36.0961	1	0	1	0	0	0	1	0	1	0		0	0	0	0	1	136	44.4	56.2	5.48		2018-04-04	11	0	1	0	0	0	0	0	0	0	0		3	85	136	1000	0		0	10	10
86-90	2018-04-27	Bladder tumor	172	79	26.7036	0	0	0	0	0	0	0	0	1	0		0	0	0	0	0	125	37.3	93.81	5.84		2018-05-02	8	0	0	0	0	0	0	1	0	0	0		2	18	52	1000	0		0	10	10
31-35	2018-04-18	Retroperitoneal tumor	161	51	19.6752	0	0	0	0	0	0	0	0	0	0		0	0	0	0	0	132	40.5	66.7	3.66		2018-05-02	5	1	0	0	0	0	0	0	0	0	0	2	2	222	318	4100	1	500	1	2600	600	2000
81-85	2018-04-16	Glioma	170.5	77.9	26.7972	0	0	0	0	0	0	1	0	1	0		0	0	1	1	1	126	34.9	97.1	6.89	56	2018-05-03	6	0	0	0	0	1	0	0	0	0	0		3	221	333	1825	1	500	0	700	10	700
36-40	2018-05-02	Retroperitoneal tumor	168	67	23.7387	1	0	0	0	0	0	0	0	0	0		0	0	0	0	0	162	51.1	73.4	5.56	11	2018-05-04	8	0	0	0	0	0	0	1	0	0	0	2	2	223	349	11400	1	2000	1	3450	10	2850
71-75	2018-04-23	Indigitation	150	51	22.6667	1	0	0	0	0	0	0	0	0	0		0	0	0	0	0	110	32.1	50.6	4.82	147	2018-05-04	5	1	0	0	0	0	0	0	0	0	0	1	3	194	258	2950	0		0	450	50	400
51-55	2018-04-19	Pleural tumor	159	49	19.3821	0	0	0	0	0	0	0	0	0	0		0	0	0	0	0	99	31	56.4	3.9		2018-05-03	4	0	0	0	1	0	0	0	0	0	0	2	2	692	805	5200	1	500	1	1700	400	1330
56-60	2018-05-05	GIH	170	75	25.9516	1	0	0	0	0	0	0	0	0	0		0	0	0	0	1	113	25.4	60.3	7.34		2018-05-06	5	1	0	0	0	0	0	0	0	0	1	2	3	288	497	4600	0		1	1600	1100	500
66-70	2018-05-03	Renal tumor	178	73	23.04	0	0	0	0	0	0	0	0	1	0		0	0	0	0	0	73	26.2	98	5.79	559	2018-05-07	8	0	0	0	0	0	0	1	0	0	0	2	3	162	226	4100	1	500	1	1000	800	200
71-75	2018-04-20	Biliary stone	156	50	20.5457	1	1	1	0	0	0	0	0	0	0		0	0	0	0	0	100	29.1	58.07	3.35	203	2018-05-02	5	1	0	0	0	0	0	0	0	0	0	1	3	97	127	1000	1	200	0	200	50	150
86-90	2018-04-28	Colorectal tumor	174	80	26.4236	1	1	0	0	0	0	0	0	1	0		0	0	0	1	1	118	39.6	96.43	5.74	226	2018-05-07	5	1	0	0	0	0	0	0	0	0	0	1	3				0
91-95	2018-04-27	Biliary stone	182	69	20.8308	1	1	0	0	0	1	0	0	0	0		0	0	0	0	1	127	36	104.2	7.62	128	2018-05-09	5	1	0	0	0	0	0	0	0	0	0	1	3	159	210	1100	1	500	0	10	10
61-65	2018-05-07	Adrenal tumor	170	62	21.4533	0	1	0	0	0	0	1	0	1	0		0	0	1	0	0	144	44.5	71.4	6.13	21	2018-05-09	8	0	0	0	0	0	0	1	0	0	0	1	3	79	156	3800	1	1000	0	1000	10	1000
76-80	2018-05-02	Colorectal tumor	155	55	22.8928	1	0	0	0	0	0	0	0	1	0		0	0	0	0	0	125	38.9	51.57	4.56	100	2018-05-10	5	1	0	0	0	0	0	0	0	0	0	1	3	142	231	2500	1	500	0	850	50	800
76-80	2018-05-02	Pancreas tumor	176	55	17.7557	1	0	1	0	0	0	0	0	1	0		0	0	1	0	0	97	40.7	79.62	5.06	77	2018-05-08	5	1	0	0	0	0	0	0	0	0	0	1	3	261	356	3400	1	500	0	550	400	150
66-70	2018-05-02	Lung tumor	178	88	27.7743	1	0	0	0	0	0	0	0	1	0		0	0	0	0	0	130	41	89.4	6.22	66	2018-05-04	4	0	0	0	1	0	0	0	0	0	0	1	3	182	314	1100	0		0	400	50	350
56-60	2018-05-02	Bladder tumor	175	90	29.3878	1	0	0	0	0	0	0	0	1	0		0	0	0	0	0	119	28	70.5	4.97	11	2018-05-04	8	0	0	0	0	0	0	1	0	0	0	1	3	407	503	4850	1	500	1	110	10	100
86-90	2018-05-10	Biliary stone	150	45	20	1	1	1	0	0	1	0	0	0	0		0	0	0	1	0	116	35.6	78	5.68		2018-05-10	5	1	0	0	0	0	0	0	0	0	1		3	75	105		0		0
86-90	2018-05-03	Eyelid tumor	174	70	23.1206	1	0	0	0	0	0	0	0	1	1	4	0	0	0	0	0	125	40.4	217.43	14.91		2018-05-11	3	0	0	1	0	0	0	0	0	0	0		2	256	346	2100	0		0	800	400	400
46-50	2018-04-24	Esophageal tumor	171	71	24.281	0	0	1	0	0	0	0	0	1	0		0	0	1	0	1	128	24.5	83.7	4.38	158	2018-05-02	9	0	0	0	0	0	0	0	1	0	0	2	3	518	640	5000	1	500	0	1150	300	850
66-70	2018-04-23	Arterial aneurysm	156	60	24.6548	0	0	0	0	0	0	0	0	0	0		0	0	0	0	0	125	40.6	73.1	4.03	78	2018-05-14	10	0	0	0	0	0	0	0	0	1	0	2	3	355	716	3500	1	500	1	1300	600	700
81-85	2018-05-07	Colorectal tumor	170	65	22.4913	1	0	0	0	0	0	0	1	1	1	3	0	0	0	1	1	108	39.7	166.8	11.74		2018-05-14	5	1	0	0	0	0	0	0	0	0	0	2	3	160	231	1600	0		0	280	30	250
71-75	2018-05-07	Colorectal tumor	170	60	20.7612	0	0	0	0	0	0	0	0	0	0		0	0	0	0	0	138	41.3	74.06	5.03		2018-05-11	5	1	0	0	0	0	0	0	0	0	0	1	3	65	157	1600	1	500	0	10	10
76-80	2018-05-14	Prostate tumor	173	63	21.0498	1	0	0	0	0	0	0	0	1	0		0	0	0	0	0	142	47.6	69.31	5.36	35	2018-05-15	8	0	0	0	0	0	0	1	0	0	0	1	2	97	178	1600	0		0	10	10
71-75	2018-05-11	Bladder tumor	170	59	20.4152	0	0	0	0	0	1	0	0	1	0		0	0	0	0	0	135	47.7	113.08	6.89		2018-05-15	8	0	0	0	0	0	0	1	0	0	0	2	3	161	216	2100	1	1000	0	1000	1000
46-50	2018-05-16	Renal tumor	157	56	22.719	0	0	0	0	0	0	0	0	0	0		0	1	0	0	0	93	36.5	89	5.6		2018-05-16	8	0	0	0	0	0	0	1	0	0	1	2	4	228	297	6150	0		1	1560	900	660
61-65	2018-05-11	Spinal tumor	150	50	22.2222	0	0	0	0	1	0	0	0	1	0		0	0	0	0	1	132	37.2	55	5.75		2018-05-15	3	0	0	1	0	0	0	0	0	0	0		2	272	282	7500	1	1500	1	4100	2600	1500
66-70	2018-05-14	Biliary tumor	172	70	23.6614	0	0	0	0	0	0	1	0	1	0		0	0	0	0	0	138	39.5	71.04	5.64		2018-05-17	5	1	0	0	0	0	0	0	0	0	0	2	3	312	406	3500	1	1000	0	900	500	400
51-55	2018-05-16	Adrenal tumor	167	61	21.8724	0	0	0	0	0	0	0	0	0	0		0	0	0	0	0	139	47.6	71.06	4.35		2018-05-17	8	0	0	0	0	0	0	1	0	0	0	1	3	85	148	1600	1	1000	0	1000	100	900
81-85	2018-05-02	Gastric tumor	174	75	24.7721	1	1	1	0	0	0	0	0	1	0		0	0	0	0	1	115	33.9	70.7	5.91		2018-05-17	5	1	0	0	0	0	0	0	0	0	0	2	3	292	378	2600	1	500	0	300	100	200
61-65	2018-05-11	Thymoma	160	66.5	25.9766	0	0	0	0	0	0	0	0	0	0		0	0	0	0	0	146	45.4	60.6	6.51		2018-05-18	4	0	0	0	1	0	0	0	0	0	0	1	3	147	247	1700	0		0	110	10	100
56-60	2018-05-04	Duodenum tumor	168	50	17.7154	0	0	0	0	0	0	0	0	1	0		0	0	0	0	0	112	36.4	65.4	4.58	799	2018-05-14	5	1	0	0	0	0	0	0	0	0	0	1	3	266	272	2600	0		1	550	200	350
36-40	2018-05-16	Endometrial hyperplasia	161	63	24.3046	0	0	0	0	0	0	0	0	0	0		0	0	0	0	0	98	40.7	80.7	3.63		2017-05-17	4	0	0	0	1	0	0	0	0	0	0		2	165	155	750	0		0	650	0	650
71-75	2018-04-28	Spinal osteoarthritis	172	50	16.901	0	0	0	0	0	1	0	0	1	0		0	0	0	0	0	110	34.5	78	9.24	61	2018-05-18	3	0	0	1	0	0	0	0	0	0	0		3	180	262	2800	0		1	650	100	550
71-75	2018-05-15	Hip osteoarthritis	167	100	35.8564	0	0	0	0	0	0	0	0	0	0		0	0	0	0	0	133	41	100.5	7.77	32	2018-05-18	3	0	0	1	0	0	0	0	0	0	0		2	233	328	2800	1	500	1	600	10	600
76-80	2018-05-12	Arterial embolism	165	65	23.8751	1	1	1	0	0	0	0	0	0	0		0	0	0	0	0	133	40	117.04	9.67	329	2018-05-12	10	0	0	0	0	0	0	0	0	1	1		4	216	291	2700	1	1000	0	1100	400	700
71-75	2018-05-18	Penis tumor	171	78	26.6749	1	1	1	0	0	0	0	0	1	0		0	0	0	0	0	131	43.7	62.6	5.86	60	2018-05-21	8	0	0	0	0	0	0	1	0	0	0		2	33	109	1100	0		0	10	10
71-75	2018-05-04	Lung tumor	170	71	24.5675	1	1	0	0	0	0	1	0	1	0		0	0	0	0	0	128	36.1	70.5	5.04	42	2018-05-21	4	0	0	0	1	0	0	0	0	0	0	1	3	241	327	2100	0		0	160	10	150
56-60	2018-05-17	Spinal tumor	156	52	21.3675	1	0	0	0	0	0	0	0	1	1	1	0	0	0	0	0	122	44.8	78.4	5.37		2018-05-21	3	0	0	1	0	0	0	0	0	0	0		3	181	276	4500	1	500	1	1650	1200	450
66-70	2018-05-18	Gastric tumor	160	60	23.4375	0	0	0	0	0	1	0	0	1	0		0	0	0	0	0	118	44.1	72.43	5.3	49	2018-05-22	5	1	0	0	0	0	0	0	0	0	0	2	3	218	311	2500	1	500	0	400	100	300
81-85	2018-05-15	Spinal tumor	155	68	28.3039	0	0	1	0	0	0	0	1	1	0		0	0	0	0	0	139	44.5	67.51	6.94		2018-05-22	3	0	0	1	0	0	0	0	0	0	0		3	277	420	5600	1	1500	1	2550	1500	650
71-75	2018-05-15	Spinal osteoarthritis	160	90	35.1562	1	0	0	0	0	0	0	0	0	0		0	0	0	1	0	134	38.7	41.5	5.75		2018-05-23	3	0	0	1	0	0	0	0	0	0	0		3	98	209	1700	1	500	0	810	10	800
71-75	2018-05-11	Gastric tumor	166	65	23.5883	1	1	1	0	0	0	0	0	1	0		0	0	1	0	1	92	33.8	72	3.54	93	2018-05-21	5	1	0	0	0	0	0	0	0	0	0	1	3	202	276	2600	1	500	0	300	100	200
61-65	2018-05-10	Colorectal tumor	165	67	24.6097	0	0	0	0	0	0	1	1	1	0		0	1	0	0	0	134	43.2	164	7.85		2018-05-22	5	1	0	0	0	0	0	0	0	0	0	2	2	276	362	3800	1	500	0	1600	300	1300
46-50	2018-05-18	OSAS	160	62	24.2188	1	0	0	0	0	0	0	0	0	0		0	0	0	0	0	109	39.8	64.2	6.92		2018-05-24	9	0	0	0	0	0	0	0	1	0	0		2	303	395	2000	0		0	950	50	900
76-80	2018-05-09	Skin tumor	160	60	23.4375	1	1	1	1	0	1	1	0	1	0		0	0	0	0	0	98	29.3	75.8	4.87	380	2018-05-25	6	0	0	0	0	1	0	0	0	0	0		4	84	201	200	0		0	90	10	80
76-80	2018-05-10	Colorectal tumor	175	60	19.5918	0	1	0	0	0	0	0	0	1	0		0	0	0	0	0	137	38.9	107	5.39		2018-05-25	5	1	0	0	0	0	0	0	0	0	0	2	3	394	556	5300	1	500	1	1550	500	1050
71-75	2018-05-27	Arterial aneurysm	170	59	20.4152	1	0	0	0	0	0	0	0	0	0		0	0	0	0	0	97	30.1	103	8.04	22	2018-05-27	10	0	0	0	0	0	0	0	0	1	1	2	2	135	165	1500	0		0	600	10	600
61-65	2018-05-24	Prostate tumor	168	48.5	17.184	1	1	0	0	0	0	0	0	1	0		0	0	0	0	0	125	47.7	78.58	7.4		2018-04-28	8	0	0	0	0	0	0	1	0	0	0	1	2	96	163	2700	1	500	0	50	50
86-90	2018-05-17	Gastric tumor	164	95	35.3212	1	0	0	0	0	0	0	0	1	0		0	0	0	0	0	104	37.8	68.9	4.88	121	2018-05-23	5	1	0	0	0	0	0	0	0	0	0	2	3	351	494	4200	1	500	0	360	10	350
56-60	2018-05-16	Lung tumor	175	63	20.5714	1	0	0	0	0	0	0	0	1	0		0	0	1	0	0	134	37.1	65.6	5.96		2018-05-28	4	0	0	0	1	0	0	0	0	0	0	2	2	220	303	1000	0		0	500	100	400
76-80	2018-05-15	Colorectal tumor	173	75	25.0593	1	1	1	0	0	0	0	0	1	0		0	0	0	0	0	140	37.3	73.6	5.4	65	2018-05-29	5	1	0	0	0	0	0	0	0	0	0	1	3	192	289	3350	1	500	0	900	400	500
66-70	2018-05-28	Adrenal tumor	160	53	20.7031	1	1	0	0	0	0	0	0	0	0		0	0	0	0	0	131	41.7	109.67	8.87		2018-05-29	8	0	0	0	0	0	0	1	0	0	0	2	3	95	157	2500	1	500	0	3100	100	250
76-80	2018-05-14	Pancreas tumor	158	69	27.6398	0	0	0	0	0	0	0	0	1	0		0	1	0	0	0	94	29.8	63.13	5.15		2018-05-29	5	1	0	0	0	0	0	0	0	0	0	2	3
31-35	2018-05-25	Pregnancy	160	72	28.125	0	0	0	0	0	0	0	0	0	0		0	0	0	0	0	103	27.8	75.5	5.48		2018-05-25	7	0	0	0	0	0	1	0	0	0	1	2	3	49	129	700	0		1	100	100
76-80	2018-05-28	Bladder tumor	160	55	21.4844	1	0	0	0	0	0	1	0	1	0		0	1	0	0	0	94	38.9	89.7	10.84		2018-06-06	8	0	0	0	0	0	0	1	0	0	0	2	3	107	179	2100	1	500	0	150	10	150
71-75	2018-05-04	Gastric tumor	178	66.5	20.9885	1	1	1	0	0	0	0	0	1	0		0	0	0	0	0	88	33.4	97.6	7.14	128	2018-05-30	5	1	0	0	0	0	0	0	0	0	0	2	3	212	338	1800	0		0	650	10	650
76-80	2018-05-22	Gastric tumor	176	70	22.5981	0	0	0	0	0	0	0	0	1	0		0	0	0	0	1	131	40.9	77.2	3.92		2018-05-30	5	1	0	0	0	0	0	0	0	0	0	2	3	199	301	2100	1	500	0	150	50	100
71-75	2018-05-23	Liver tumor	146	92	43.1601	0	0	0	0	0	0	0	0	1	0		0	0	0	0	1	122	39.1	71.9	6.04	133	2018-05-31	5	1	0	0	0	0	0	0	0	0	0	2	2	185	253	2800	1	1000	0	1600	900	700
56-60	2018-05-21	VHL syndrome	164	57	21.1927	1	1	0	0	0	0	1	0	1	0		0	1	0	0	0	129	40	72	4.44		2018-05-31	6	0	0	0	0	1	0	0	0	0	0		3	444	529	6050	1	1500	0	4550	500	4050
81-85	2018-05-25	Bladder tumor	170	69	23.8754	0	1	0	0	0	0	0	0	1	0		0	0	0	0	0	136	41.4	98.6	8.2		2018-05-28	8	0	0	0	0	0	0	1	0	0	0	2	2	145	196	2000	1	500	0	500	500
86-90	2018-05-21	Colorectal tumor	168	70	24.8016	0	1	0	0	0	0	1	0	1	0		0	0	0	0	0	136	36.7	56.8	4.08		2018-05-31	5	1	0	0	0	0	0	0	0	0	0	2	3	201	294	2350	0		0	200	50	150
86-90	2018-05-21	Tumor of chest wall	163	63	23.7118	1	0	0	0	0	1	0	0	0	0		0	0	0	0	0	128	37.4	84	6.06		2018-05-31	5	1	0	0	0	0	0	0	0	0	0		3	62	170	1500	0		0	400	100	300
81-85	2018-05-25	Liver tumor	172	70	23.6614	0	0	0	0	0	0	0	0	1	0		0	0	0	0	0	129	38.3	87.64	6.75	38	2018-06-01	5	1	0	0	0	0	0	0	0	0	0	2	3	213	295	2100	1	500	0	1000	200	800
81-85	2018-05-24	Breast tumor	146	46	21.58	0	0	1	0	0	0	0	0	1	0		0	0	0	0	0	116	41.2	60.1	2.78		2018-06-01	5	1	0	0	0	0	0	0	0	0	0		2	85	141	1000	0		0	10	10
56-60	2018-05-28	GIST	168	55	19.487	0	0	0	0	0	0	0	0	0	0		0	0	0	0	0	142	44.8	66.23	3.74		2018-06-01	5	1	0	0	0	0	0	0	0	0	0	2	2	289	405	7250	1	1500	1	2800	2000	800
76-80	2018-06-02	Ileus	160	49	19.1406	1	1	1	0	0	0	0	0	1	0		0	0	0	0	0	121	24.7	42.5	5.6		2018-06-02	5	1	0	0	0	0	0	0	0	0	0	2	4	173	205	2700	1	500	0	700	10	700
51-55	2018-05-25	Colorectal tumor	172	72	24.3375	1	0	1	0	0	0	0	0	1	0		0	0	1	0	1	144	39.1	72.2	4.34		2018-06-01	5	1	0	0	0	0	0	0	0	0	0	2	2	231	320	3500	1	1000	0	750	100	650
[truncated: 65 more columns]
